# Supplementary material for: Comparative Effectiveness of Circular Frames, Plate Fixation, and Intramedullary Nailing in Distal-Third Tibial Fractures: A Systematic Review and Meta-Analysis
Source: Research Square preprint supplement (doi:10.21203/rs.3.rs-8501129/v1), 2026-02-10
Supplement: Supplementary file 1 [file 16c63c185cc6243a7c96a9a4.pdf]

# Supplementary Information

## Broad contents:

|                                                                    |      |
|--------------------------------------------------------------------|------|
| ❖ <b>SI1</b> – Search and screening.....                           | (2)  |
| ❖ <b>SI2</b> – Data extraction tables.....                         | (10) |
| ❖ <b>SI3</b> – Analyses of bias.....                               | (53) |
| ❖ <b>SI4</b> – Primary meta-analyses and sensitivity analyses..... | (72) |
| ❖ <b>SI5</b> – PRISMA 2020 Checklist.....                          | (82) |

# **Search and screening**

## ***Supplementary Information 1 (SI1)***

### Contents:

|                                                     |     |
|-----------------------------------------------------|-----|
| ❖ <b>SI1.1 – Inclusion/Exclusion criteria</b> ..... | (4) |
| <i>Presented in a table using the PICOS format</i>  |     |
| ❖ <b>SI1.2 – Search terms</b>                       |     |
| ➤ SI1.2.1 – PubMed Advanced Search.....             | (6) |
| ➤ SI1.2.2 – Web of Science.....                     | (6) |
| ➤ SI1.2.3 – CINAHL(EBSCO).....                      | (7) |
| ➤ SI1.2.4 – Clinicaltrials.gov.....                 | (7) |
| ➤ SI1.2.5 – Scopus.....                             | (8) |
| ➤ SI1.2.6 – Ovid: MEDLINE, CENTRAL, AMED.....       | (8) |
| ➤ SI1.2.7 – Ovid: Embase.....                       | (9) |

# **Inclusion/Exclusion**

## **criteria**

(SI1.1)

### S1.1

| PICOS framework                 | Include                                                                                                                                                                                                                                                                             | Exclude                                                                                                                |
|---------------------------------|-------------------------------------------------------------------------------------------------------------------------------------------------------------------------------------------------------------------------------------------------------------------------------------|------------------------------------------------------------------------------------------------------------------------|
| <b>Population</b>               | Skeletally mature patients (age $\geq 16$ ) treated surgically for an acute distal tibia fracture.                                                                                                                                                                                  | Paediatric patients (age $< 16$ ).                                                                                     |
| <b>Intervention/Comparators</b> | All studies comparing at least two of the following interventions: <ul style="list-style-type: none"> <li>• Intramedullary nailing</li> <li>• Circular frame</li> <li>• Plate fixation</li> </ul>                                                                                   | Non-comparative studies.                                                                                               |
| <b>Outcomes</b>                 | Studies investigating at least one of the following outcomes: <ul style="list-style-type: none"> <li>• Time to union (weeks)</li> <li>• Time to weight-bearing</li> <li>• Infections</li> <li>• Overall complications</li> <li>• Ultimate clinical/radiological outcomes</li> </ul> | Studies not investigating any of the outcomes.                                                                         |
| <b>Study design</b>             | <ul style="list-style-type: none"> <li>• Randomised Control Trials (RCTs)</li> <li>• Cohort/case-control studies</li> </ul>                                                                                                                                                         | <ul style="list-style-type: none"> <li>• Case reports/series</li> <li>• Other reviews</li> <li>• Editorials</li> </ul> |

# **Search terms**

(SI1.2)

### *S/1.2.1*

#### **PubMed (Advanced search) = 487 search results**

( ( ("External Fixators"[MeSH] OR "Ilizarov Technique"[MeSH] OR "circular fram\*"[tiab] OR "external fixat\*"[tiab] OR "Ilizarov\*"[tiab] OR "fram\*"[tiab]) AND ("Fracture Fixation, Internal"[MeSH] OR "Bone Plates"[MeSH] OR "plate fixat\*"[tiab] OR "internal fixat\*"[tiab] OR "plate\*"[tiab] OR "osteosynthesis"[tiab]) ) OR ( ("Fracture Fixation, Internal"[MeSH] OR "Bone Plates"[MeSH] OR "plate fixat\*"[tiab] OR "internal fixat\*"[tiab] OR "plate\*"[tiab] OR "osteosynthesis"[tiab]) AND ("Fracture Fixation, Intramedullary"[MeSH] OR "intramedullary nail\*"[tiab] OR "intramedullary fixat\*"[tiab] OR "IM nail\*"[tiab] OR "nail fixat\*"[tiab]) ) OR ( ("External Fixators"[MeSH] OR "Ilizarov Technique"[MeSH] OR "circular fram\*"[tiab] OR "external fixat\*"[tiab] OR "Ilizarov\*"[tiab] OR "fram\*"[tiab]) AND ("Fracture Fixation, Intramedullary"[MeSH] OR "intramedullary nail\*"[tiab] OR "intramedullary fixat\*"[tiab] OR "IM nail\*"[tiab] OR "nail fixat\*"[tiab]) ) ) AND ( "Tibia"[MeSH] OR "distal tibia\*"[tiab] OR "lower tibia\*"[tiab] OR "distal third tibi\*"[tiab] OR "lower third tibi\*"[tiab] ) AND ( "Fractures, Bone"[MeSH] OR fracture\*[tiab] ) AND ( randomi\*[tiab] OR trial[tiab] OR cohort[tiab] OR "case control"[tiab] OR "case-control"[tiab] OR observational\*[tiab] OR prospective[tiab] OR retrospective[tiab] OR "follow-up"[tiab] OR "follow up"[tiab] ) NOT ( "case report"[ti] OR "case series"[ti] OR "systematic review"[ti] OR "scoping review"[ti] OR "narrative review"[ti] OR "umbrella review"[ti] OR "meta analysis"[ti] OR editorial[pt] ) AND english[lang]

### *S/1.2.2*

#### **Web of Science = 151 search results**

((TS=((("external fixation" OR "circular frame" OR ilizarov) AND ("plate fixation" OR "internal fixation" OR osteosynthesis))) OR (TS=((("plate fixation" OR "internal fixation" OR osteosynthesis) AND ("intramedullary nailing" OR "intramedullary fixation" OR "IM nail" OR "nail fixation")))) OR (TS=((("external fixation" OR "circular frame" OR ilizarov) AND ("intramedullary nailing" OR "intramedullary fixation" OR "IM nail" OR "nail fixation"))))) AND TS=("distal tibia" OR "lower tibia" OR "distal third tibia" OR "lower third tibia") AND TS=(fracture) AND TS=(randomi\* OR trial OR cohort OR "case-control" OR observational OR prospective OR retrospective OR "follow-up") NOT TI=("case report" OR "case series" OR "systematic review" OR "scoping review" OR "narrative review" OR "umbrella review" OR "meta analysis" OR editorial)

*Apply English language only in the filters*

### S/1.2.3

**CINAHL(EBSCO)** = 73 search results

((((TI "external fixat\*" OR AB "external fixat\*" OR TI "circular fram\*" OR AB "circular fram\*" OR TI ilizarov\* OR AB ilizarov\* OR TI fram\* OR AB fram\*) AND (TI "plate fixat\*" OR AB "plate fixat\*" OR TI "internal fixat\*" OR AB "internal fixat\*" OR TI plate\* OR AB plate\* OR TI osteosynthesis OR AB osteosynthesis)) OR ((TI "plate fixat\*" OR AB "plate fixat\*" OR TI "internal fixat\*" OR AB "internal fixat\*" OR TI plate\* OR AB plate\* OR TI osteosynthesis OR AB osteosynthesis) AND (TI "intramedullary nail\*" OR AB "intramedullary nail\*" OR TI "intramedullary fixat\*" OR AB "intramedullary fixat\*" OR TI "im nail\*" OR AB "im nail\*" OR TI "nail fixat\*" OR AB "nail fixat\*")) OR ((TI "external fixat\*" OR AB "external fixat\*" OR TI "circular fram\*" OR AB "circular fram\*" OR TI ilizarov\* OR AB ilizarov\* OR TI fram\* OR AB fram\*) AND (TI "intramedullary nail\*" OR AB "intramedullary nail\*" OR TI "intramedullary fixat\*" OR AB "intramedullary fixat\*" OR TI "im nail\*" OR AB "im nail\*" OR TI "nail fixat\*" OR AB "nail fixat\*")))) AND (TI "distal tibia\*" OR AB "distal tibia\*" OR TI "lower tibia\*" OR AB "lower tibia\*" OR TI "distal third tibi\*" OR AB "distal third tibi\*" OR TI "lower third tibi\*" OR AB "lower third tibi\*") AND (TI fracture\* OR AB fracture\*) AND (TI (randomi\* OR trial OR cohort OR "case-control" OR observational\* OR prospective OR retrospective OR "follow-up") OR AB (randomi\* OR trial OR cohort OR "case-control" OR observational\* OR prospective OR retrospective OR "follow-up")) NOT TI ("case report" OR "case series" OR "systematic review" OR "scoping review" OR "narrative review" OR "umbrella review" OR "meta analysis" OR editorial)

*Apply English language only in the filters*

### S/1.2.4

**Clinicaltrials.gov (grey literature)** = 13 search results

(distal tibia OR lower tibia OR distal third tibia) AND (fracture OR fractures) AND (((external fixator OR Ilizarov OR circular frame) AND (internal fixation OR bone plates OR osteosynthesis)) OR ((internal fixation OR bone plates OR osteosynthesis) AND (intramedullary nail OR IM nail OR nail fixation OR intramedullary fixation)) OR ((external fixator OR Ilizarov OR circular frame) AND (intramedullary nail OR IM nail OR nail fixation OR intramedullary fixation))) AND (randomized OR trial OR cohort OR observational OR prospective OR retrospective OR follow-up)

### S/1.2.5

**Scopus** = 378 search results

((TITLE-ABS-KEY("external fixat\*" OR "circular fram\*" OR ilizarov\* OR fram\*) AND TITLE-ABS-KEY("plate fixat\*" OR "internal fixat\*" OR plate\* OR osteosynthesis)) OR (TITLE-ABS-KEY("plate fixat\*" OR "internal fixat\*" OR plate\* OR osteosynthesis) AND TITLE-ABS-KEY("intramedullary nail\*" OR "intramedullary fixat\*" OR "im nail\*" OR "nail fixat\*"))) OR (TITLE-ABS-KEY("external fixat\*" OR "circular fram\*" OR ilizarov\* OR fram\*) AND TITLE-ABS-KEY("intramedullary nail\*" OR "intramedullary fixat\*" OR "im nail\*" OR "nail fixat\*")) AND TITLE-ABS-KEY("distal tibia\*" OR "lower tibia\*" OR "distal third tibi\*" OR "lower third tibi\*") AND TITLE-ABS-KEY(fracture\*) AND TITLE-ABS-KEY(randomi\* OR trial OR cohort OR "case-control" OR observational\* OR prospective OR retrospective OR "follow-up") AND NOT TITLE("case report" OR "case series" OR "systematic review" OR "scoping review" OR "narrative review" OR "umbrella review" OR "meta analysis" OR editorial) AND (LIMIT-TO(LANGUAGE, "English"))

### S/1.2.6

| #  | Search (Ovid: MEDLINE, CENTRAL, AMED) = 181 search results                                                                                                        |
|----|-------------------------------------------------------------------------------------------------------------------------------------------------------------------|
| 1  | "Circular fram*" OR "External Fixat*" OR "Ilizarov*" OR "fram*"                                                                                                   |
| 2  | ("Circular fram*" OR "External Fixat*" OR "Ilizarov*" OR "fram*").ti,ab                                                                                           |
| 3  | 1 OR 2                                                                                                                                                            |
| 4  | "Plate fixat*" OR "Internal Fixat*" OR "plate*" OR "osteosynthesis"                                                                                               |
| 5  | ("Plate fixat*" OR "Internal Fixat*" OR "plate*" OR "osteosynthesis").ti,ab                                                                                       |
| 6  | 4 OR 5                                                                                                                                                            |
| 7  | "intramedullary nail*" OR "Intramedullary fixat*" OR "IM nail*" OR "nail fixat*"                                                                                  |
| 8  | ("intramedullary nail*" OR "Intramedullary fixat*" OR "IM nail*" OR "nail fixat*").ti,ab                                                                          |
| 9  | 7 OR 8                                                                                                                                                            |
| 10 | (3 AND 6) OR (3 AND 9) OR (6 AND 9) OR (3 AND 6 AND 9)                                                                                                            |
| 11 | "distal tibia*" OR "lower tibia*" OR "distal third tibi*" OR "lower third tibi*"                                                                                  |
| 12 | ("distal tibia*" OR "lower tibia*" OR "distal third tibi*" OR "lower third tibi*").ti,ab                                                                          |
| 13 | 11 OR 12                                                                                                                                                          |
| 14 | "fracture*"                                                                                                                                                       |
| 15 | "fracture*".ti                                                                                                                                                    |
| 16 | 14 OR 15                                                                                                                                                          |
| 17 | 13 AND 16                                                                                                                                                         |
| 18 | 10 AND 17                                                                                                                                                         |
| 19 | ("case report" OR "case series" OR "systematic review" OR "Scoping review" OR "narrative review" OR "umbrella review" OR "meta analysis" OR "editorial").ti       |
| 20 | 18 NOT 19                                                                                                                                                         |
| 21 | (randomi* OR "trial" OR "cohort" OR "case control" OR "case-control" OR "observational*" OR "prospective" OR "retrospective" OR "follow-up" OR "follow up").ti,ab |
| 22 | 20 AND 21                                                                                                                                                         |
| 23 | Limit 22 to English Language                                                                                                                                      |



# SI1.2.7

| #  | Search (Ovid: Embase) = 180 search results                                                                                                                           |
|----|----------------------------------------------------------------------------------------------------------------------------------------------------------------------|
| 1  | "Circular fram*" / OR "External Fixat*" / OR "Ilizarov*" / OR "fram*" /                                                                                              |
| 2  | ("Circular fram*" OR "External Fixat*" OR "Ilizarov*" OR "fram*").ti,ab,kw                                                                                           |
| 3  | 1 OR 2                                                                                                                                                               |
| 4  | "Plate fixat*" / OR "Internal Fixat*" / OR "plate*" / OR "osteosynthesis" /                                                                                          |
| 5  | ("Plate fixat*" OR "Internal Fixat*" OR "plate*" OR "osteosynthesis").ti,ab,kw                                                                                       |
| 6  | 4 OR 5                                                                                                                                                               |
| 7  | "intramedullary nail*" / OR "Intramedullary fixat*" / OR "IM nail*" / OR "nail fixat*" /                                                                             |
| 8  | ("intramedullary nail*" OR "Intramedullary fixat*" OR "IM nail*" OR "nail fixat*").ti,ab,kw                                                                          |
| 9  | 7 OR 8                                                                                                                                                               |
| 10 | (3 AND 6) OR (3 AND 9) OR (6 AND 9) OR (3 AND 6 AND 9)                                                                                                               |
| 11 | "distal tibia*" / OR "lower tibia*" / OR "distal third tibi*" / OR "lower third tibi*" /                                                                             |
| 12 | ("distal tibia*" OR "lower tibia*" OR "distal third tibi*" OR "lower third tibi*").ti,ab,kw                                                                          |
| 13 | 11 OR 12                                                                                                                                                             |
| 14 | "fracture*" /                                                                                                                                                        |
| 15 | "fracture*".ti,kw                                                                                                                                                    |
| 16 | 14 OR 15                                                                                                                                                             |
| 17 | 13 AND 16                                                                                                                                                            |
| 18 | 10 AND 17                                                                                                                                                            |
| 19 | ("case report" OR "case series" OR "systematic review" OR "Scoping review" OR "narrative review" OR "umbrella review" OR "meta analysis" OR "editorial").ti,kw       |
| 20 | 18 NOT 19                                                                                                                                                            |
| 21 | (randomi* OR "trial" OR "cohort" OR "case control" OR "case-control" OR "observational*" OR "prospective" OR "retrospective" OR "follow-up" OR "follow up").ti,ab,kw |
| 22 | 20 AND 21                                                                                                                                                            |
| 23 | Limit 22 to English Language                                                                                                                                         |

# **Data-extraction tables**

## ***Supplementary Information 2 (SI2)***

### Contents:

- ❖ SI2.1 – Randomised control trials (RCT)
  - SI2.1.1 – RCT Baseline characteristics.....(12)
  - SI2.1.2 – RCT data (Radiographically-assessed).....(13)
  - SI2.1.3 – RCT data (Patient-assessed).....(17)
  - SI2.1.4 – RCT data (Clinician-assessed).....(21)
- ❖ SI2.2 – Non-randomised studies (NRS)
  - SI2.2.1 – NRS Baseline characteristics.....(25)
  - SI2.2.2 – NRS data (Radiographically-assessed).....(27)
  - SI2.2.3 – NRS data (Patient-assessed).....(37)
  - SI2.2.4 – NRS data (Clinician-assessed).....(46)

\* denotes statistically significant result ( $p < 0.05$ )

# **Randomised Control**

# **Trials**

(SI2.1)

### SI2.1.1 – Baseline characteristics for the randomised control trials

| Study                | Country     | Setting                                      | Intra- or Extra-Articular | Intervention         | Comparator(s)                         | Sample size |     |       |                |                                                                      |
|----------------------|-------------|----------------------------------------------|---------------------------|----------------------|---------------------------------------|-------------|-----|-------|----------------|----------------------------------------------------------------------|
|                      |             |                                              |                           |                      |                                       | Total       | IMN | Plate | Circular frame | Missing                                                              |
| Im et al., 2005      | South Korea | University-affiliated tertiary care hospital | Both                      | Nail                 | Plate (ORIF)                          | 78          | 34  | 30    |                | 12 patients lost to FUP                                              |
| Guo et al., 2010     | China       | University-affiliated tertiary care hospital | Extra (AO43A only)        | Nail                 | Plate (MIPO)                          | 85          | 44  | 41    |                | 0                                                                    |
| Vallier et al., 2011 | USA         | Level 1 Trauma centre ≈ MTC                  | Extra (OTA 42-A, B, C)    | Plate (ORIF)         | Nail                                  | 104         | 56  | 48    |                | 0                                                                    |
| Li et al., 2014      | China       | Tertiary centre                              | Extra (OTA 42-A, B, C)    | Plate (MIPO)         | Nail ; [monolateral external fixator] | 121         | 40  | 42    |                | 15 lost to FUP/death/other                                           |
| Polat et al., 2015   | Turkey      | Level 1 Trauma centre ≈ MTC                  | Extra (AO42A1, 43A1)      | Nail                 | Plate (MIPO)                          | 25          | 10  | 15    |                | 0                                                                    |
| Imran et al., 2016   | Pakistan    | Tertiary centre                              | Extra                     | Plate (MIPO)         | Nail                                  | 86          | 43  | 43    |                | 0                                                                    |
| Wani et al., 2017    | India       | Tertiary centre                              | Extra (AO42A1-3)          | Nail                 | Plate (MIPO)                          | 60          | 30  | 30    |                | 0                                                                    |
| Costa et al., 2018   | UK          | 28 acute trauma centres.                     | Extra                     | Nail                 | Plate (MIPO)                          | 321         | 161 | 160   |                | 10 withdrawals post-randomisation                                    |
| Rayan et al., 2018   | Egypt       | University-affiliated tertiary care hospital | Intra                     | Plate (ORIF)         | Circular frame                        | 45          |     | 22    | 20             | 3 missing: 2 lost to FUP (1 from each group) and 1 refused treatment |
| Sharma et al., 2018  | Nepal       | Tertiary centre                              | Extra & Intra             | Plate (MIPO)         | Circular frame (hybrid Ilizarov)      | 80          |     | 40    | 40             | 0                                                                    |
| KC et al., 2021      | Nepal       | Tertiary centre                              | Extra                     | Nail                 | Plate (MIPO)                          | 100         | 50  | 50    |                | 0                                                                    |
| Kumar et al., 2022   | India       | University-affiliated tertiary care hospital | Extra (AO43A only)        | Nail                 | Plate (MIPO)                          | 52          | 26  | 26    |                | 0                                                                    |
| Ahmed et al., 2023   | Iraq        | University-affiliated tertiary care hospital | Extra                     | Plate (MIPO)         | Nail                                  | 20          | 10  | 10    |                | 0                                                                    |
| Hamdy et al., 2024   | Egypt       | 2 tertiary centres                           | Extra (AO43A1 only)       | Nail (Poller screws) | Plate (ORIF)                          | 65          | 31  | 34    |                | 3 lost to FUP in IMN group: 34-3=31                                  |
| Prabhat et al., 2025 | India       | Single tertiary centre                       | Extra (AO43A only)        | Nail (ETN)           | Plate (ORIF)                          | 60          | 30  | 30    |                | 0                                                                    |

### SI2.1.2 – Radiographically assessed data from the randomised control trials

| Study                | Main Outcomes                                                                                        | Outcome Timepoints                                                                                                                                                            | Time to union (weeks)      |                             |                | Time to partial weight bearing (weeks) |       |                | Time to full weight bearing (weeks) |       |                | Teeny and Wiss |       |                | Points of interest                                                                                                    |
|----------------------|------------------------------------------------------------------------------------------------------|-------------------------------------------------------------------------------------------------------------------------------------------------------------------------------|----------------------------|-----------------------------|----------------|----------------------------------------|-------|----------------|-------------------------------------|-------|----------------|----------------|-------|----------------|-----------------------------------------------------------------------------------------------------------------------|
|                      |                                                                                                      |                                                                                                                                                                               | IMN                        | Plate                       | Circular frame | IMN                                    | Plate | Circular frame | IMN                                 | Plate | Circular frame | IMN            | Plate | Circular frame |                                                                                                                       |
| Im et al., 2005      | Time to union; Infection (superficial & deep); OMAS                                                  | Time to Union = weeks; OMAS = 2 years; Infection = cumulative (final review at 2 years)                                                                                       | 18 (range = 12– 64)        | 20 (range = 12– 72)         |                |                                        |       |                |                                     |       |                |                |       |                | Significantly higher angulation in IMN compared to MIPO. However, IMN had significantly better ankle range of motion. |
| Guo et al., 2010     | Time to union; AOFAS; Pain; Function; Wound problems (delayed wound healing & superficial infection) | AOFAS, Pain, Function = 12 months (cumulative 3, 6, 12 month reviews); Time to union = weeks; Wound problems = 5 days, 14/15 days                                             | 17.66 (95% CI = 16.7-18.6) | 17.59 (95% CI = 16.9- 18.3) |                |                                        |       |                |                                     |       |                |                |       |                | Alignment was equal between groups. IMN had increased pain but better function.                                       |
| Vallier et al., 2011 | Malunion; Nonunion; Infection; Secondary operations                                                  | Infection and secondary complications = not specified (likely reviewed cumulatively at routine follow up appointments - see Points of Interest ["POI"])                       |                            |                             |                |                                        |       |                |                                     |       |                |                |       |                | Significantly greater malalignment in IMN group.                                                                      |
| Li et al., 2014      | Time to union (radiographic); Ankle function (Mazur ankle score)                                     | Time to union = weeks; Ankle function (Mazur ankle score) = 12 months; infection = not specified (likely reviewed cumulatively at routine follow up appointments - see "POI") | 15.6 ± 3.2                 | 15 ± 3.4                    |                |                                        |       |                |                                     |       |                |                |       |                | No significant difference in malunion but IMN had greater knee pain reported (transtendinous approach).               |

*SI2.1.2 – Radiographically assessed data from the randomised control trials (continued)*

|                    |                                                                                                                                                                               |                                                                                                                                                                                                           |                                   |                                   |  |  |  |  |             |             |  |  |  |  |                                                                                                         |
|--------------------|-------------------------------------------------------------------------------------------------------------------------------------------------------------------------------|-----------------------------------------------------------------------------------------------------------------------------------------------------------------------------------------------------------|-----------------------------------|-----------------------------------|--|--|--|--|-------------|-------------|--|--|--|--|---------------------------------------------------------------------------------------------------------|
| Polat et al., 2015 | Time to union; Time for full weight-bearing; Foot function Index score; Superficial Infection                                                                                 | Time to union = mean days; Time for full weight-bearing = mean days; Foot Function Index score (FFI) = final FUP (mean ; Superficial Infection = cumulative until final FUP                               | 18.4 ± 1.97                       | 19.13 ± 2.17                      |  |  |  |  | 5.64 ± 2.54 | 6.51 ± 3.17 |  |  |  |  | Malunion was similar but there was significantly greater malalignment due to rotation in the IMN group. |
| Imran et al., 2016 | Union rates                                                                                                                                                                   | Measured 3 months after surgery                                                                                                                                                                           | Union rates at: 3 months = 97.67% | Union rates at: 3 months = 79.07% |  |  |  |  |             |             |  |  |  |  |                                                                                                         |
| Wani et al., 2017  | FFI; Complications (inc. malunion, infection, implant removal, time to union and secondary operations); Time to union; Time to full weight-bearing                            | FFI = 12 months; Time to union, time to full weight-bearing = days; Complications = not specified (likely reviewed cumulatively at routine follow up appointments - see "POI")                            | 18.44 ± 1.93                      | 19.14 ± 0.73                      |  |  |  |  | 5.36 ± 2.26 | 6.23 ± 2.99 |  |  |  |  | Malunion was similar but there was significantly greater malalignment due to rotation in the IMN group. |
| Costa et al., 2018 | DRI; OMAS, EQ-5D, Complications (inc. malunion, nonunion, infection, wound problems, neurovascular and tendon injury, VTE, ankle osteoarthritis, malalignment and shortening) | DRI, OMAS, EQ-5D and radiographs (nonunion, arthritis, malalignment, shortening, malunion) = baseline, 6 weeks and 12 months; DRI, OMAS, EQ-5D, complications = 6 weeks, 3 months, 6 months and 12 months |                                   |                                   |  |  |  |  |             |             |  |  |  |  | Significantly more patients weight-bearing at the 6-week timepoint.                                     |

SI2.1.2 – Radiographically assessed data from the randomised control trials (continued)

|                     |                                                                                             |                                                                                                                                                                                                                                                               |              |                                |                                  |             |             |  |  |  |  |  |  |  |                                                                                                                            |
|---------------------|---------------------------------------------------------------------------------------------|---------------------------------------------------------------------------------------------------------------------------------------------------------------------------------------------------------------------------------------------------------------|--------------|--------------------------------|----------------------------------|-------------|-------------|--|--|--|--|--|--|--|----------------------------------------------------------------------------------------------------------------------------|
| Rayan et al., 2018  | Time to Union; AOFAS                                                                        | Time to Union = mean days; AOFAS = final FUP 2 years post-op                                                                                                                                                                                                  |              | 16.13                          | 14                               |             |             |  |  |  |  |  |  |  | Malunion rate is equal in both groups. Significantly better AOFAS score in frame group.                                    |
| Sharma et al., 2018 | Infection; Time to full weight-bearing; Clinical and radiological union                     | Infection = 2nd postop day, 2 weeks, 6 weeks, 12 weeks. time to full weight bearing = not specified (cumulative to final FUP). Clinical and radiological union = 2, 6 and 12 weeks.                                                                           |              | Union rates at: 12 weeks = 90% | Union rates at: 12 weeks = 82.5% |             |             |  |  |  |  |  |  |  | Malunion, malalignment and ROM was similar between groups. However, rotational malalignment was not measured.              |
| KC et al., 2021     | Time to Union; Time to partial weight-bearing; AOFAS; Superficial infection; Deep infection | Time to Union = mean weeks; Time to partial weight-bearing = mean weeks; AOFAS = final FUP 1 year after fracture; [Superficial infection; Deep infection] = cumulative FUPs every 6 weeks for 6 months and every 3 months after that until final FUP (1 year) | 25.90 ± 5.19 | 26.06 ± 5.35                   |                                  | 7.02 ± 1.55 | 7.32 ± 1.49 |  |  |  |  |  |  |  | Knee pain / malunion significantly higher in IMN compared to plate. But MIPO had significantly more superficial infection. |

*SI2.1.2 – Radiographically assessed data from the randomised control trials (continued)*

|                      |                                                                                                                       |                                                                                                                                                                                        |                                                                       |                                                                       |  |  |  |  |       |       |  |              |               |  |                                                                                                                                                                                                                  |
|----------------------|-----------------------------------------------------------------------------------------------------------------------|----------------------------------------------------------------------------------------------------------------------------------------------------------------------------------------|-----------------------------------------------------------------------|-----------------------------------------------------------------------|--|--|--|--|-------|-------|--|--------------|---------------|--|------------------------------------------------------------------------------------------------------------------------------------------------------------------------------------------------------------------|
| Kumar et al., 2022   | Time to union; Time to full weight-bearing; Teeny and Wiss; Complications (including deep and superficial infections) | Time to union = mean weeks; Time to full weight-bearing = mean weeks; Teeny and Wiss = measured at final FUP (24 weeks); Complications = measured cumulatively until 24-week final FUP | 23 ± 5.35                                                             | 23.69 ± 7.20                                                          |  |  |  |  | 11.48 | 12.96 |  | 84.84 ± 9.66 | 84.26 ± 11.79 |  |                                                                                                                                                                                                                  |
| Ahmed et al., 2023   | Time to union; Knee Society Score; Superficial infection                                                              | Time to weight bearing = mean weeks; Knee Society Score = "0-100" after final FUP at 24 weeks; Superficial infection = cumulative until final 24-week FUP                              | 9.3 ± 1.77                                                            | 10.2 ± 1.48                                                           |  |  |  |  |       |       |  |              |               |  | No malunions reported + no significant difference in complications between groups. Knee pain reported in 20% of IMN patients compared to none in the plating group. (infra/suprapatellar approach not specified) |
| Hamdy et al., 2024   | OMAS; Overall complications (inc. deep infection); Time to union                                                      | OMAS = 3&6 months; Complications = cumulative (final FUP = 6 months); Time to union = mean weeks                                                                                       | 21.16±0.58 SD converted (assumed to be SEM mislabelled) 0.58 --> 3.23 | 22.17±0.53 SD converted (assumed to be SEM mislabelled) 0.53 --> 3.09 |  |  |  |  |       |       |  |              |               |  |                                                                                                                                                                                                                  |
| Prabhat et al., 2025 | AOFAS; Infection; Time to union; Weight-bearing; radiological outcomes                                                | AOFAS = 6 months final FUP; Infection = cumulative at 6-month final FUP; Time to union = mean months; WB = not specified; Rad. = not specified                                         | 21.811±4.7584                                                         | 23.833±6.9918                                                         |  |  |  |  |       |       |  |              |               |  |                                                                                                                                                                                                                  |



### SI2.1.3 – Patient-assessed data from the randomised control trials

| Study                | Main Outcomes                                                                                        | Outcome Timepoints                                                                                                                                                            | AOFAS (mean)                             |                                          |                | OMAS             |                  |                | Other                                                        |                                                              |                | Points of interest                                                                                                    |
|----------------------|------------------------------------------------------------------------------------------------------|-------------------------------------------------------------------------------------------------------------------------------------------------------------------------------|------------------------------------------|------------------------------------------|----------------|------------------|------------------|----------------|--------------------------------------------------------------|--------------------------------------------------------------|----------------|-----------------------------------------------------------------------------------------------------------------------|
|                      |                                                                                                      |                                                                                                                                                                               | IMN                                      | Plate                                    | Circular frame | IMN              | Plate            | Circular frame | IMN                                                          | Plate                                                        | Circular frame |                                                                                                                       |
| Im et al., 2005      | Time to union; Infection (superficial & deep); OMAS                                                  | Time to Union = weeks; OMAS = 2 years; Infection = cumulative (final review at 2 years)                                                                                       |                                          |                                          |                | 24 months = 88.5 | 24 months = 88.2 |                |                                                              |                                                              |                | Significantly higher angulation in IMN compared to MIPO. However, IMN had significantly better ankle range of motion. |
| Guo et al., 2010     | Time to union; AOFAS; Pain; Function; Wound problems (delayed wound healing & superficial infection) | AOFAS, Pain, Function = 12 months (cumulative 3, 6, 12 month reviews); Time to union = weeks; Wound problems = 5 days, 14/15 days                                             | 12 months = 86.1 (95% CI = 83.7 to 88.6) | 12 months = 83.9 (95% CI = 81.7 to 86.1) |                |                  |                  |                |                                                              |                                                              |                | Alignment was equal between groups. IMN had increased pain but better function.                                       |
| Vallier et al., 2011 | Malunion; Nonunion; Infection; Secondary operations                                                  | Infection and secondary complications = not specified (likely reviewed cumulatively at routine follow up appointments - see Points of Interest ["POI"])                       |                                          |                                          |                |                  |                  |                |                                                              |                                                              |                | Significantly greater malalignment in IMN group.                                                                      |
| Li et al., 2014      | Time to union (radiographic); Ankle function (Mazur ankle score)                                     | Time to union = weeks; Ankle function (Mazur ankle score) = 12 months; infection = not specified (likely reviewed cumulatively at routine follow up appointments - see "POI") |                                          |                                          |                |                  |                  |                | Proportion with "excellent/good" Mazur score 12 months = 87% | Proportion with "excellent/good" Mazur score 12 months = 90% |                | No significant difference in malunion but IMN had greater knee pain reported (transtendinous approach).               |

*SI2.1.3 – Patient-assessed data from the randomised control trials (continued)*

|                    |                                                                                                                                                                                  |                                                                                                                                                                                                          |  |                  |                  |                                                                          |                                                                          |  |                                                                                                   |                                                                                                   |  |                                                                                                         |
|--------------------|----------------------------------------------------------------------------------------------------------------------------------------------------------------------------------|----------------------------------------------------------------------------------------------------------------------------------------------------------------------------------------------------------|--|------------------|------------------|--------------------------------------------------------------------------|--------------------------------------------------------------------------|--|---------------------------------------------------------------------------------------------------|---------------------------------------------------------------------------------------------------|--|---------------------------------------------------------------------------------------------------------|
| Polat et al., 2015 | Time to union;<br>Time for full weight-bearing;<br>Foot function Index score;<br>Superficial Infection                                                                           | Time to union = mean days; Time for full weight-bearing = mean days; Foot Function Index score (FFI) = final FUP (mean ; Superficial Infection = cumulative until final FUP                              |  |                  |                  |                                                                          |                                                                          |  | Foot function index<br>12 months = 25.7 ± 11.1                                                    | Foot function index<br>12 months = 25.3 ± 16.4                                                    |  | Malunion was similar but there was significantly greater malalignment due to rotation in the IMN group. |
| Imran et al., 2016 | Union rates                                                                                                                                                                      | Measured 3 months after surgery                                                                                                                                                                          |  |                  |                  |                                                                          |                                                                          |  |                                                                                                   |                                                                                                   |  |                                                                                                         |
| Wani et al., 2017  | FFI;<br>Complications (inc. malunion, infection, implant removal, time to union and secondary operations);<br>Time to union;<br>Time to full weight-bearing                      | FFI = 12 months; Time to union, time to full weight-bearing = days; Complications = not specified (likely reviewed cumulatively at routine follow up appointments - see "POI")                           |  |                  |                  |                                                                          |                                                                          |  | Foot function index<br>12 months = 23.7±7.0                                                       | Foot function index<br>12 months = 25.4±16.3                                                      |  | Malunion was similar but there was significantly greater malalignment due to rotation in the IMN group. |
| Costa et al., 2018 | DRI; OMAS, EQ-5D,<br>Complications (inc. malunion, nonunion, infection, wound problems, neurovascular and tendon injury, VTE, ankle osteoarthritis, malalignment and shortening) | DRI, OMAS, EQ-5D and radiographs (nonunion, arthritis, malalignment, shortening, malunion) = baseline, 6weeks and 12 months; DRI, OMAS, EQ-5D, complications = 6 weeks, 3 months, 6 months and 12 months |  |                  |                  | 3 months = 42.3 ±22.1<br>6 months = 62.4 ±23.1<br>12 months = 73.8 ±22.5 | 3 months = 36.0 ±21.3<br>6 months = 57.6 ±24.9<br>12 months = 70.8 ±24.2 |  | DRI (primary outcome)<br>3 months = 44.2 ±19.9<br>6 months = 29.8 ±23.1<br>12 months = 23.1 ±23.3 | DRI (primary outcome)<br>3 months = 52.6 ±19.9<br>6 months = 33.8 ±24.7<br>12 months = 24.0 ±24.6 |  | Significantly more patients weight-bearing at the 6-week timepoint.                                     |
| Rayan et al., 2018 | Time to Union;<br>AOFAS                                                                                                                                                          | Time to Union = mean days;<br>AOFAS = final FUP 2 years post-op                                                                                                                                          |  | 24 months = 82.3 | 24 months = 86.7 |                                                                          |                                                                          |  |                                                                                                   |                                                                                                   |  | Malunion rate is equal in both groups. Significantly better AOFAS score in frame group.                 |

SI2.1.3 – Patient-assessed data from the randomised control trials (continued)

|                     |                                                                                                                       |                                                                                                                                                                                                                                                               |                          |                          |  |  |  |  |                            |                                                                       |                                                                       |                                                                                                                                                                                                                  |
|---------------------|-----------------------------------------------------------------------------------------------------------------------|---------------------------------------------------------------------------------------------------------------------------------------------------------------------------------------------------------------------------------------------------------------|--------------------------|--------------------------|--|--|--|--|----------------------------|-----------------------------------------------------------------------|-----------------------------------------------------------------------|------------------------------------------------------------------------------------------------------------------------------------------------------------------------------------------------------------------|
| Sharma et al., 2018 | Infection; Time to full weight-bearing; Clinical and radiological union                                               | Infection = 2nd postop day, 2 weeks, 6 weeks, 12 weeks. time to full weight bearing = not specified (cumulative to final FUP). Clinical and radiological union = 2, 6 and 12 weeks.                                                                           |                          |                          |  |  |  |  |                            | Lower Extremity Functional Score (% of maximum function) = 83.93±3.26 | Lower Extremity Functional Score (% of maximum function) = 83.18±3.83 | Malunion, malalignment and ROM was similar between groups. However, rotational malalignment was not measured.                                                                                                    |
| KC et al., 2021     | Time to Union; Time to partial weight-bearing; AOFAS; Superficial infection; Deep infection                           | Time to Union = mean weeks; Time to partial weight-bearing = mean weeks; AOFAS = final FUP 1 year after fracture; [Superficial infection; Deep infection] = cumulative FUPs every 6 weeks for 6 months and every 3 months after that until final FUP (1 year) | 12 months = 83.84 ± 8.87 | 12 months = 84.16 ± 8.80 |  |  |  |  |                            |                                                                       |                                                                       | Knee pain / malunion significantly higher in IMN compared to plate. But MIPO had significantly more superficial infection.                                                                                       |
| Kumar et al., 2022  | Time to union; Time to full weight-bearing; Teeny and Wiss; Complications (including deep and superficial infections) | Time to union = mean weeks; Time to full weight-bearing = mean weeks; Teeny and Wiss = measured at final FUP (24 weeks); Complications = measured cumulatively until 24-week final FUP                                                                        |                          |                          |  |  |  |  |                            |                                                                       |                                                                       |                                                                                                                                                                                                                  |
| Ahmed et al., 2023  | Time to union; Knee Society Score; Superficial infection                                                              | Time to weight bearing = mean weeks; Knee Society Score = "0-100" after final FUP at 24 weeks; Superficial infection = cumulative until final 24-week FUP                                                                                                     |                          |                          |  |  |  |  | KSS at 24 weeks = 79 ± 7.0 | KSS at 24 weeks = 76 ± 6.14                                           |                                                                       | No malunions reported + no significant difference in complications between groups. Knee pain reported in 20% of IMN patients compared to none in the plating group. (infra/suprapatellar approach not specified) |

SI2.1.3 – Patient-assessed data from the randomised control trials (continued)

|                      |                                                                        |                                                                                                                                                |                 |               |  |                                                                                                                                    |                                                                                                                                    |  |  |  |  |  |
|----------------------|------------------------------------------------------------------------|------------------------------------------------------------------------------------------------------------------------------------------------|-----------------|---------------|--|------------------------------------------------------------------------------------------------------------------------------------|------------------------------------------------------------------------------------------------------------------------------------|--|--|--|--|--|
| Hamdy et al., 2024   | OMAS; Overall complications (inc. deep infection); Time to union       | OMAS = 3&6 months; Complications = cumulative (final FUP = 6 months); Time to union = mean weeks                                               |                 |               |  | 3 months = 48.23±1.05<br>6 months = 64.83±1.32<br>SDs converted (assumed to be SEMs mislabelled)<br>1.05 --> 5.85<br>1.32 --> 7.35 | 3 months = 36.02±1.07<br>6 months = 57.94±1.14<br>SDs converted (assumed to be SEMs mislabelled)<br>1.07 --> 6.24<br>1.14 --> 6.65 |  |  |  |  |  |
| Prabhat et al., 2025 | AOFAS; Infection; Time to union; Weight-bearing; radiological outcomes | AOFAS = 6 months final FUP; Infection = cumulative at 6 month final FUP; Time to union = mean months; WB = not specified; Rad. = not specified | 6 months = 90.3 | 6 months = 89 |  |                                                                                                                                    |                                                                                                                                    |  |  |  |  |  |

*SI2.1.4 – Clinician-assessed data from the randomised control trials*

| Study                | Main Outcomes                                                                                        | Outcome Timepoints                                                                                                                                                            | Superficial Infections (%) |        |                | Deep infections (%) |       |                | Infection rate (%) |       |                | Overall complication rate (%) |       |                | Points of interest                                                                                                    |
|----------------------|------------------------------------------------------------------------------------------------------|-------------------------------------------------------------------------------------------------------------------------------------------------------------------------------|----------------------------|--------|----------------|---------------------|-------|----------------|--------------------|-------|----------------|-------------------------------|-------|----------------|-----------------------------------------------------------------------------------------------------------------------|
|                      |                                                                                                      |                                                                                                                                                                               | IMN                        | Plate  | Circular frame | IMN                 | Plate | Circular frame | IMN                | Plate | Circular frame | IMN                           | Plate | Circular frame |                                                                                                                       |
| Im et al., 2005      | Time to union; Infection (superficial & deep); OMAS                                                  | Time to Union = weeks; OMAS = 2 years; Infection = cumulative (final review at 2 years)                                                                                       | 3%                         | 20.00% |                | 0%                  | 3.33% |                |                    |       |                |                               |       |                | Significantly higher angulation in IMN compared to MIPO. However, IMN had significantly better ankle range of motion. |
| Guo et al., 2010     | Time to union; AOFAS; Pain; Function; Wound problems (delayed wound healing & superficial infection) | AOFAS, Pain, Function = 12 months (cumulative 3, 6, 12 month reviews); Time to union = weeks; Wound problems = 5 days, 14/15 days                                             |                            |        |                |                     |       |                |                    |       |                |                               |       |                | Alignment was equal between groups. IMN had increased pain but better function.                                       |
| Vallier et al., 2011 | Malunion; Nonunion; Infection; Secondary operations                                                  | Infection and secondary complications = not specified (likely reviewed cumulatively at routine follow up appointments - see Points of Interest ["POI"])                       |                            |        |                | 5%                  | 6.25% |                |                    |       |                |                               |       |                | Significantly greater malalignment in IMN group.                                                                      |
| Li et al., 2014      | Time to union (radiographic); Ankle function (Mazur ankle score)                                     | Time to union = weeks; Ankle function (Mazur ankle score) = 12 months; infection = not specified (likely reviewed cumulatively at routine follow up appointments - see "POI") | 2.50%                      | 16.67% |                | 5.00%               | 2.38% |                |                    |       |                |                               |       |                | No significant difference in malunion but IMN had greater knee pain reported (transtendinous approach).               |
| Polat et al., 2015   | Time to union; Time for full weight-bearing; Foot function Index score; Superficial Infection        | Time to union = mean days; Time for full weight-bearing = mean days; Foot Function Index score (FFI) = final FUP (mean ; Superficial Infection = cumulative until final FUP   | 0.00%                      | 6.67%  |                |                     |       |                |                    |       |                |                               |       |                | Malunion was similar but there was significantly greater malalignment due to rotation in the IMN group.               |

SI2.1.4 – Clinician-assessed data from the randomised control trials (continued)

|                     |                                                                                                                                                                               |                                                                                                                                                                                                           |       |        |  |    |                                                   |    |  |  |  |  |  |  |                                                                                                               |
|---------------------|-------------------------------------------------------------------------------------------------------------------------------------------------------------------------------|-----------------------------------------------------------------------------------------------------------------------------------------------------------------------------------------------------------|-------|--------|--|----|---------------------------------------------------|----|--|--|--|--|--|--|---------------------------------------------------------------------------------------------------------------|
| Imran et al., 2016  | Union rates                                                                                                                                                                   | Measured 3 months after surgery                                                                                                                                                                           |       |        |  |    |                                                   |    |  |  |  |  |  |  |                                                                                                               |
| Wani et al., 2017   | FFI; Complications (inc. malunion, infection, implant removal, time to union and secondary operations); Time to union; Time to full weight-bearing                            | FFI = 12 months; Time to union, time to full weight-bearing = days; Complications = not specified (likely reviewed cumulatively at routine follow up appointments - see "POI")                            | 0.00% | 10.00% |  |    |                                                   |    |  |  |  |  |  |  | Malunion was similar but there was significantly greater malalignment due to rotation in the IMN group.       |
| Costa et al., 2018  | DRI; OMAS, EQ-5D, Complications (inc. malunion, nonunion, infection, wound problems, neurovascular and tendon injury, VTE, ankle osteoarthritis, malalignment and shortening) | DRI, OMAS, EQ-5D and radiographs (nonunion, arthritis, malalignment, shortening, malunion) = baseline, 6 weeks and 12 months; DRI, OMAS, EQ-5D, complications = 6 weeks, 3 months, 6 months and 12 months |       |        |  | 1% | 3.13%                                             |    |  |  |  |  |  |  | Significantly more patients weight-bearing at the 6-week timepoint.                                           |
| Rayan et al., 2018  | Time to Union; AOFAS                                                                                                                                                          | Time to Union = mean days; AOFAS = final FUP 2 years post-op                                                                                                                                              |       |        |  |    |                                                   |    |  |  |  |  |  |  | Malunion rate is equal in both groups. Significantly better AOFAS score in frame group.                       |
| Sharma et al., 2018 | Infection; Time to full weight-bearing; Clinical and radiological union                                                                                                       | Infection = 2nd postop day, 2 weeks, 6 weeks, 12 weeks. time to full weight bearing = not specified (cumulative to final FUP). Clinical and radiological union = 2, 6 and 12 weeks.                       |       |        |  |    | 7.5% (at 12 weeks post -op requiring debridement) | 0% |  |  |  |  |  |  | Malunion, malalignment and ROM was similar between groups. However, rotational malalignment was not measured. |

SI2.1.4 – Clinician-assessed data from the randomised control trials (continued)

|                      |                                                                                                                       |                                                                                                                                                                                                                                                               |        |        |  |       |        |  |        |        |  |        |        |  |                                                                                                                                                                                                                  |
|----------------------|-----------------------------------------------------------------------------------------------------------------------|---------------------------------------------------------------------------------------------------------------------------------------------------------------------------------------------------------------------------------------------------------------|--------|--------|--|-------|--------|--|--------|--------|--|--------|--------|--|------------------------------------------------------------------------------------------------------------------------------------------------------------------------------------------------------------------|
| KC et al., 2021      | Time to Union; Time to partial weight-bearing; AOFAS; Superficial infection; Deep infection                           | Time to Union = mean weeks; Time to partial weight-bearing = mean weeks; AOFAS = final FUP 1 year after fracture; [Superficial infection; Deep infection] = cumulative FUPs every 6 weeks for 6 months and every 3 months after that until final FUP (1 year) | 4.00%  | 8.00%  |  | 2%    | 2.00%  |  |        |        |  |        |        |  | Knee pain / malunion significantly higher in IMN compared to plate. But MIPO had significantly more superficial infection.                                                                                       |
| Kumar et al., 2022   | Time to union; Time to full weight-bearing; Teeny and Wiss; Complications (including deep and superficial infections) | Time to union = mean weeks; Time to full weight-bearing = mean weeks; Teeny and Wiss = measured at final FUP (24 weeks); Complications = measured cumulatively until 24 week final FUP                                                                        | 11.53% | 0.00%  |  | 3.85% | 15.38% |  |        |        |  | 23.08% | 26.92% |  |                                                                                                                                                                                                                  |
| Ahmed et al., 2023   | Time to union; Knee Society Score; Superficial infection                                                              | Time to weight bearing = mean weeks; Knee Society Score = "0-100" after final FUP at 24 weeks; Superficial infection = cumulative until final 24-week FUP                                                                                                     | 0.00%  | 10.00% |  |       |        |  |        |        |  |        |        |  | No malunions reported + no significant difference in complications between groups. Knee pain reported in 20% of IMN patients compared to none in the plating group. (infra/suprapatellar approach not specified) |
| Hamdy et al., 2024   | OMAS; Overall complications (inc. deep infection); Time to union                                                      | OMAS = 3&6 months; Complications = cumulative (final FUP = 6 months); Time to union = mean weeks                                                                                                                                                              |        |        |  | 0.00% | 10%    |  |        |        |  | 3.20%  | 18.50% |  |                                                                                                                                                                                                                  |
| Prabhat et al., 2025 | AOFAS; Infection; Time to union; Weight-bearing; radiological outcomes                                                | AOFAS = 6 months final FUP; Infection = cumulative at 6 month final FUP; Time to union = mean months; WB = not specified; Rad. = not specified                                                                                                                | 10.00% | 33.33% |  | 0.00% | 6.70%  |  | 10.00% | 40.00% |  |        |        |  |                                                                                                                                                                                                                  |

# **Non-randomised** **studies** (SI2.2)



SI2.2.1 – Baseline characteristics for the non-randomised studies

| Study                    | Study Design  | Country            | Setting                                      | Intra- or Extra-Articular                    | Intervention | Comparator(s)               | Sample size                                                            |     |       |                |                                                                                                        |
|--------------------------|---------------|--------------------|----------------------------------------------|----------------------------------------------|--------------|-----------------------------|------------------------------------------------------------------------|-----|-------|----------------|--------------------------------------------------------------------------------------------------------|
|                          |               |                    |                                              |                                              |              |                             | Total                                                                  | IMN | Plate | Circular frame | Missing                                                                                                |
| Harris et al., 2006      | Retrospective | US                 | Level 1 Trauma Centre                        | Intra (OTA43-B1, B2, B3 OR OTA43-C1, C2, C3) | Plate (ORIF) | Circular frame              | 79 (based on number of fractures, not patients of which there were 76) |     | 63    | 16             | Only 33 of the 76 patients completed outcomes questionnaires.                                          |
| Yang et al., 2006        | Retrospective | Taiwan             | University-affiliated tertiary care hospital | Extra (AO43A)                                | Nail         | Plate (ORIF)                | 27                                                                     | 13  | 14    |                |                                                                                                        |
| Janssen et al., 2007     | Retrospective | Netherlands        | University-affiliated tertiary care hospital | Extra (AO42A1-3, B2)                         | Nail         | Plate (ORIF)                | 112                                                                    | 92  | 20    |                |                                                                                                        |
| Koulouvaris et al., 2007 | Retrospective | Greece             | Tertiary Centre                              | Intra (Type C1, C2, C3, B2 & B3)             | Plate (MIPO) | Circular frame              | 55                                                                     |     | 13    | 22             | 20 patients treated with a half-pin external fixator (not ring) making up the total participants to 55 |
| Vallier et al., 2008     | Retrospective | USA                | Two level 1 trauma centres ≈MTCs             | Extra (AO42A, B, C)                          | Nail         | Plate (both MIPO and ORIF)  | 113                                                                    | 76  | 37    |                |                                                                                                        |
| Li et al., 2012          | Retrospective | China              | Tertiary Centre                              | Extra                                        | Nail         | Plate (MIPO)                | 46                                                                     | 23  | 23    |                |                                                                                                        |
| Seyhan et al., 2012      | Retrospective | Turkey             | Tertiary Centre                              | Extra                                        | Nail         | Plate (MIPO)                | 61                                                                     | 25  | 36    |                |                                                                                                        |
| Fadel et al., 2014       | Prospective   | Egypt              | Tertiary Centre                              | Extra                                        | Nail         | Plate (ORIF)                | 40                                                                     |     | 20    | 20             |                                                                                                        |
| Ali et al., 2015         | Retrospective | Egypt/Saudi Arabia | 2 tertiary centres                           | Both                                         | Nail         | Plate (MIPO)                | 60                                                                     | 30  | 30    |                |                                                                                                        |
| Jöstl et al., 2015       | Retrospective | Austria            | Level 1 Trauma Centre                        | Extra (AO42-A, B, C or 43-A, B1)             | Nail         | Circular frame; Plate       | 93                                                                     | 66  | 15    | 12             |                                                                                                        |
| Ali et al., 2016         | Prospective   | India              | University-affiliated tertiary care hospital | Extra (AO43A only)                           | Nail         | Plate (MIPO)                | 60                                                                     | 30  | 30    |                |                                                                                                        |
| Barcak et al., 2016      | Prospective   | USA                | Level II regional trauma center.             | Both (OTA 43-A1-3, 43-C1-2)                  | Nail         | Plate (MIPO)                | 86                                                                     | 27  | 37    |                | 22 did not meet inclusion criteria.                                                                    |
| Shen et al., 2016        | Retrospective | China              | Tertiary Centre                              | Extra (AO43A only)                           | Nail         | Plate (MIPO)                | 125                                                                    | 61  | 64    |                | 134 met inclusion criteria. 9 excluded due to lack of follow up data                                   |
| Beytemur et al., 2017    | Retrospective | Turkey             | Tertiary Centre                              | Intra (AO43C1-2)                             | Nail         | Plate (MIPO)                | 73                                                                     | 37  | 36    |                |                                                                                                        |
| Imren et al., 2017       | Retrospective | Turkey             | University-affiliated tertiary care hospital | Intra (Ruedi and Allgower Type B and C)      | Plate (MIPO) | Circular frame (Tasarimmed) | 41                                                                     |     | 21    | 20             |                                                                                                        |
| Kawalkar et al., 2018    | Retrospective | India              | Tertiary Centre                              | Extra (AO43A only)                           | Nail         | Plate (MIPO)                | 63                                                                     | 31  | 32    |                |                                                                                                        |
| Mahendra et al., 2018    | Prospective   | India              | University-affiliated tertiary care hospital | Extra (AO43A only)                           | Nail         | Plate (MIPO)                | 55                                                                     | 25  | 20    |                |                                                                                                        |
| Vaianti et al., 2019     | Prospective   | Italy              | First level Trauma centre ≈ MTC              | Extra & Intra (close or G&A Type I)          | Nail         | Plate (MIPO)                | 183                                                                    | 102 | 81    |                |                                                                                                        |

*SI2.2.1 – Baseline characteristics for the non-randomised studies (continued)*

|                         |               |             |                                              |                                   |                   |                                              |     |     |     |    |                                                                                                                        |
|-------------------------|---------------|-------------|----------------------------------------------|-----------------------------------|-------------------|----------------------------------------------|-----|-----|-----|----|------------------------------------------------------------------------------------------------------------------------|
| Say et al., 2020        | Retrospective | Turkey      | University-affiliated tertiary care hospital | Extra (AO43A1, 43A2, 43A3)        | Nail              | Plate (MIPO)                                 | 35  | 18  | 17  |    |                                                                                                                        |
| El Zohairy et al., 2021 | Prospective   | Egypt       | University-affiliated tertiary care hospital | Extra (AO43A1, 43A2 & 43A3 only)  | Nail              | Plate (MIPO)                                 | 96  | 48  | 48  |    |                                                                                                                        |
| Keerio et al., 2021     | Prospective   | Pakistan    | University-affiliated tertiary care hospital | Extra                             | Nail              | Plate (ORIF)                                 | 60  | 30  | 30  |    |                                                                                                                        |
| Kumar et al., 2021      | Prospective   | India       | Tertiary Centre                              | Extra                             | Nail              | Plate (MIPO)                                 | 40  | 20  | 20  |    |                                                                                                                        |
| Almishri et al., 2022   | Prospective   | Egypt       | University-affiliated tertiary care hospital | Extra                             | Nail              | Plate (MIPO)                                 | 18  | 9   | 9   |    |                                                                                                                        |
| Bleeker et al., 2022    | Retrospective | Switzerland | Level 1 Trauma centre ≈ MTC                  | Extra (AO 42-A, 42-B, 42-C, 43-A) | Nail              | Plate (MIPO)                                 | 135 | 63  | 72  |    |                                                                                                                        |
| Sharma et al., 2022     | Prospective   | India       | Tertiary Centre                              | Extra                             | Nail              | Plate (MIPO)                                 | 30  | 15  | 15  |    |                                                                                                                        |
| Bastías et al., 2023    | Retrospective | Chile       | MTC                                          | Intra (AO43C only)                | Plate (ORIF)      | Circular frame (hexapod)                     | 53  |     | 30  | 23 |                                                                                                                        |
| Kaya et al., 2023       | Retrospective | Turkey      | University-affiliated tertiary care hospital | Extra (AO42A1-3, 42B1-3, 42C1-3)  | Nail              | Plate (MIPO)                                 | 69  | 35  | 34  |    |                                                                                                                        |
| Kumar et al., 2023      | Prospective   | India       | Tertiary Centre                              | Extra                             | Nail              | Plate (ORIF)                                 | 20  | 10  | 10  |    |                                                                                                                        |
| Nath et al., 2023       | Prospective   | India       | University-affiliated tertiary care hospital | Extra (AO43 only)                 | Nail              | Plate (MIPO)                                 | 40  | 20  | 20  |    | 20 patients were analysed. 5 IMN patients and 3 plate patients did not meet the inclusion criteria and excluded prior. |
| M. Singh et al., 2023   | Prospective   | India       | Tertiary Centre                              | Extra                             | Nail              | Plate (ORIF)                                 | 30  | 15  | 15  |    |                                                                                                                        |
| S. Singh et al., 2023   | Prospective   | India       | Tertiary Centre                              | Extra                             | Nail              | Plate (ORIF)                                 | 30  | 15  | 15  |    |                                                                                                                        |
| Taori et al., 2023      | Prospective   | India       | Tertiary Centre                              | Both                              | Nail              | Plate (MIPO); [monolateral external fixator] | 60  | 18  | 30  | 0  |                                                                                                                        |
| Tukade, 2023            | Prospective   | India       | Tertiary Centre                              | Both                              | Nail              | Plate (ORIF), Circular frame (Ilizarov)      | 30  | 11  | 15  | 4  |                                                                                                                        |
| Wang et al., 2023       | Retrospective | China       | University-affiliated tertiary care hospital | Extra (AO 43-A or AO42)           | Nail              | Plate (MIPO)                                 | 266 | 156 | 110 |    |                                                                                                                        |
| Jang et al., 2024       | Retrospective | USA         | Level-I academic trauma centre.              | Intra (AO43C1-2)                  | Nail              | Plate                                        | 110 | 33  | 77  |    |                                                                                                                        |
| Liu et al., 2024        | Retrospective | China       | Level 1 Trauma centre ≈ MTC                  | Extra (AO43A1-3)                  | Nail (retrograde) | Plate (MIPO)                                 | 48  | 21  | 27  |    |                                                                                                                        |
| Rafiq et al., 2024      | Retrospective | Pakistan    | Tertiary Centre                              | Extra / Partial Intra (AO43-A&B)  | Nail              | Plate (MIPO)                                 | 35  | 17  | 18  |    |                                                                                                                        |
| Shaikh et al., 2024     | Retrospective | Pakistan    | Level 1 Trauma centre ≈ MTC                  | Intra (AOC1, C2, C3)              | Plate (ORIF)      | Circular frame                               | 41  |     | 15  | 26 |                                                                                                                        |
| Singh et al., 2025      | Prospective   | India       | Tertiary Centre                              | Extra                             | Nail              | Plate (MIPO); Circular frame                 | 35  | 12  | 11  | 12 |                                                                                                                        |

## SI2.2.2 – Radiographically assessed data from the non-randomised studies

| Study                    | Main relevant Outcomes                                              | Outcome Timepoints                                                                                                              | Time to union (weeks)           |                                  |                                  | Time to partial weight bearing (weeks) |       |                | Time to full weight bearing (weeks) |       |                | Teeny and Wiss |       |                | Points of interest                                                                                                                                                                                                  |
|--------------------------|---------------------------------------------------------------------|---------------------------------------------------------------------------------------------------------------------------------|---------------------------------|----------------------------------|----------------------------------|----------------------------------------|-------|----------------|-------------------------------------|-------|----------------|----------------|-------|----------------|---------------------------------------------------------------------------------------------------------------------------------------------------------------------------------------------------------------------|
|                          |                                                                     |                                                                                                                                 | IMN                             | Plate                            | Circular frame                   | IMN                                    | Plate | Circular frame | IMN                                 | Plate | Circular frame | IMN            | Plate | Circular frame |                                                                                                                                                                                                                     |
| Harris et al., 2006      | Complications (inc. wound problems, superficial and deep infection) | Complications = cumulative to final FUP                                                                                         |                                 |                                  |                                  |                                        |       |                |                                     |       |                |                |       |                | ORIF associated with fewer complications and less post-traumatic arthritis                                                                                                                                          |
| Yang et al., 2006        | OMAS; Time to union                                                 | Time to union = weeks; OMAS, Malalignment, Malunion, Anterior knee pain = not specified (final FUP ≈ 33months)                  | 22.6 ± 4.3 (range 18-30)        | 27.8 ± 7.6 (range 18-36)         |                                  |                                        |       |                |                                     |       |                |                |       |                | No significant difference in low ankle score nor malunion/misalignment (rotational was not measured). Anterior knee pain reported in some IMN patients compared to none in the plate group.                         |
|                          |                                                                     |                                                                                                                                 | p = 0.037* (independent t-test) |                                  |                                  |                                        |       |                |                                     |       |                |                |       |                |                                                                                                                                                                                                                     |
| Janssen et al., 2007     | Time to union; Infection; Time to weight-bearing                    | Time to union, time to weight-bearing = mean weeks; Infection (likely cumulative at final FUP - see points of interest ["POI"]) | 21 (range 13-28)                | 19 (range 14-32)                 |                                  |                                        |       |                | 14.34                               | 16.51 |                |                |       |                | Main reason for plate removal was because patients "felt it there". Main reason for IMN removal was knee pain. Insignificant differences in malalignment/malunion (including rotational), despite their hypotheses. |
|                          |                                                                     |                                                                                                                                 | p = 0.44 (paired t-test)        |                                  |                                  |                                        |       |                | p = 0.14 (paired t-test)            |       |                |                |       |                |                                                                                                                                                                                                                     |
| Koulouvaris et al., 2007 | Time to union; Infection                                            | Time to union = months; Infection = 1 week, 1 month, monthly for 12 months & annual follow-up (cumulative)                      |                                 | 22.16 ± 2.17 (range 17.38-26.07) | 24.33 ± 4.78 (range 17.38-39.11) |                                        |       |                |                                     |       |                |                |       |                | Significant relationship with the type of fracture and infection. No malunions or nonunions.                                                                                                                        |
|                          |                                                                     |                                                                                                                                 | p = 0.688 (one-way ANOVA)       |                                  |                                  |                                        |       |                |                                     |       |                |                |       |                |                                                                                                                                                                                                                     |
| Vallier et al., 2008     | Complications (inc. infection)                                      | Infection = cumulative at final FUP                                                                                             |                                 |                                  |                                  |                                        |       |                |                                     |       |                |                |       |                | Significantly greater malunion following IMN malalignment. IMN also had significantly greater procedures other than hardware removal (reasons including malalignment).                                              |

*SI2.2.2 – Radiographically assessed data from the non-randomised studies (continued)*

|                     |                                                                                            |                                                                                                                                                                                                    |                                |                    |      |  |  |                                            |              |                   |  |  |                                                                                                                                                                                                                                 |
|---------------------|--------------------------------------------------------------------------------------------|----------------------------------------------------------------------------------------------------------------------------------------------------------------------------------------------------|--------------------------------|--------------------|------|--|--|--------------------------------------------|--------------|-------------------|--|--|---------------------------------------------------------------------------------------------------------------------------------------------------------------------------------------------------------------------------------|
| Li et al., 2012     | Time to Union; Time to full weight-bearing; OMAS; Deep infection; Superficial infection    | Time to union = mean weeks; Time to full weight-bearing = mean weeks; OMAS = measured at final FUP (25.2 weeks); Infection rates measured cumulatively until final FUP (25.2 weeks between groups) | 21.3 ± 3.5                     | 23.1 ± 3.6         |      |  |  | 9.0 ± 1.4                                  | 11.1 ± 1.7   |                   |  |  | No significant differences in anterior knee pain or malalignment. No cases of nonunion, implant failure or delayed union. No significant differences in mean postoperative varus/valgus angulation, ante-/recurvatum alignment. |
|                     |                                                                                            |                                                                                                                                                                                                    | p = 0.047* (paired t-test)     |                    |      |  |  | P = 0.000* (paired t-test)                 |              |                   |  |  |                                                                                                                                                                                                                                 |
| Seyhan et al., 2012 | Time to union; Time to full weight-bearing; Deep infection; Deep and superficial infection | Time to union = mean weeks; Time to full weight-bearing = mean weeks; Infections = measured cumulatively until final FUP (mean 21.4 months)                                                        | 15.74 ± 3.92                   | 17.24 ± 3.05       |      |  |  | 12.95 ± 2.95                               | 15.21 ± 2.80 |                   |  |  | No statistically significant difference in rates of nonunion, malunion or implant irritation. Rate of secondary procedures significantly higher in plate compared to IMN.                                                       |
|                     |                                                                                            |                                                                                                                                                                                                    | p = 0.113 (independent t-test) |                    |      |  |  | P = 0.005* (independent t-test)            |              |                   |  |  |                                                                                                                                                                                                                                 |
| Fadel et al., 2014  | Time to union; Time to partial weight-bearing; Time to full weight-bearing; AOFAS          | Time to union = mean weeks; Time to partial weight-bearing = mean days; Time to full weight-bearing = mean weeks; AOFAS = measured at final FUP (24 weeks)                                         |                                | 28                 | 18.5 |  |  |                                            | From 28.24   | From 0.14 (day 1) |  |  | No cases of delayed union or nonunion in the CF group (significant difference).                                                                                                                                                 |
|                     |                                                                                            |                                                                                                                                                                                                    | p = 0.003* (Mann-Whitney test) |                    |      |  |  | No statistical significance test performed |              |                   |  |  |                                                                                                                                                                                                                                 |
| Ali et al., 2015    | Time to union; Time to full weight-bearing; AOFAS; Superficial infection; Deep infection   | Time to union = mean weeks; Time to full weight-bearing = mean weeks; AOFAS = at final FUP?; Superficial + Deep infection cumulative to final follow-up (mean FUP was 34.2 months between groups)  | 15.74 (range 10-25)            | 17.2 (range 11-30) |      |  |  | 6.66                                       | 11.4         |                   |  |  | No difference in rotational malalignment and insignificantly greater angular malalignment in the MIPO group vs IMN. None of these malalignments required secondary operation.                                                   |
|                     |                                                                                            |                                                                                                                                                                                                    | p = 0.2209 (paired t-test)     |                    |      |  |  | p = 0.0154* (paired t-test)                |              |                   |  |  |                                                                                                                                                                                                                                 |

*SI2.2.2 – Radiographically assessed data from the non-randomised studies (continued)*

|                     |                                                                                                                                                                          |                                                                                                                                                                                                                             |                                                                                                  |                   |               |                               |           |  |                               |            |  |                                |                        |  |                                                                                                                                                                                 |
|---------------------|--------------------------------------------------------------------------------------------------------------------------------------------------------------------------|-----------------------------------------------------------------------------------------------------------------------------------------------------------------------------------------------------------------------------|--------------------------------------------------------------------------------------------------|-------------------|---------------|-------------------------------|-----------|--|-------------------------------|------------|--|--------------------------------|------------------------|--|---------------------------------------------------------------------------------------------------------------------------------------------------------------------------------|
| Jöstl et al., 2015  | Time to union; Overall complication rate (inc. nonunion, implant irritation, painful scar, post-traumatic arthritis, refracture, compartment syndrome, Sudeck's disease) | Time to union = days; Overall complication rate = cumulative at final FUP                                                                                                                                                   | 21.05 ± 13.02                                                                                    | 19.39 ± 15.82     | 23.30 ± 13.83 |                               |           |  |                               |            |  |                                |                        |  | No significant differences in malunion, post-traumatic arthritis, refracture, painful/broken interlocking screw, or range of motion in the knee joint between the three groups. |
|                     |                                                                                                                                                                          |                                                                                                                                                                                                                             | IMN vs CF p = 0.001*<br>Plate vs CF p = 0.01*<br>Plate vs IMN p = 0.293<br>(Kruskal-Wallis test) |                   |               |                               |           |  |                               |            |  |                                |                        |  |                                                                                                                                                                                 |
| Ali et al., 2016    | Time to Union; Time to partial weight-bearing; Time to full weight-bearing; Teeny and Wiss; Deep/superficial infection                                                   | Time to Union = mean weeks; Time to partial weight-bearing = mean weeks; Time to full weight-bearing = mean weeks; Teeny and Wiss = final FUP 9 months post-op; Deep/superficial infection = cumulative FUPs until 9 months | 18.8 ± 6.0                                                                                       | 20.5 ± 4.8        |               | 6.0 ± 1.4                     | 6.1 ± 1.6 |  | 16.2 ± 4.2                    | 15.0 ± 3.8 |  | 86.9 ± 10 at 9 months          | 88.6 ± 6.6 at 9 months |  | Malunion, Delayed union, Ankle stiffness, Anterior knee pain, and Nonunion were measured. None of these were statistically significant using Fisher's test.                     |
|                     |                                                                                                                                                                          |                                                                                                                                                                                                                             | p = 0.25 (independent t-test)                                                                    |                   |               | p = 0.87 (independent t-test) |           |  | p = 0.24 (independent t-test) |            |  | p = 0.451 (independent t-test) |                        |  |                                                                                                                                                                                 |
| Barcak et al., 2016 | AOFAS; SF-36; Time to union; Superficial infections                                                                                                                      | Time to union = weeks; AOFAS, SF-36 = at minimum of 1 year follow up; Infection = cumulative at final FUP                                                                                                                   | 23.2 (range 8-60)                                                                                | 23.4 (range 9-60) |               |                               |           |  |                               |            |  |                                |                        |  | Quantitatively higher scores in Short Form 36 scores in the IMN group but no significant difference. No significant difference in malalignment (rotational not measured).       |
|                     |                                                                                                                                                                          |                                                                                                                                                                                                                             | P = 0.84 (independent t-test)                                                                    |                   |               |                               |           |  |                               |            |  |                                |                        |  |                                                                                                                                                                                 |
| Shen et al., 2016   | Wound complications                                                                                                                                                      | Cumulative until final FUP at 12 months (FUP 6, 10, 14 weeks, then every 6–8 weeks)                                                                                                                                         |                                                                                                  |                   |               |                               |           |  |                               |            |  |                                |                        |  | Malreduction / deformity (inc. valgus/varus, ante-/recurvature, rotation): significantly higher in IMN. No cases of shortening or nonunion.                                     |

S12.2.2 – Radiographically assessed data from the non-randomised studies (continued)

|                       |                                                                                                                    |                                                                                                                                                                                                                    |                                  |                          |          |                                            |              |   |                                                                                                                          |                          |      |  |  |  |                                                                                                                                                                                                                 |
|-----------------------|--------------------------------------------------------------------------------------------------------------------|--------------------------------------------------------------------------------------------------------------------------------------------------------------------------------------------------------------------|----------------------------------|--------------------------|----------|--------------------------------------------|--------------|---|--------------------------------------------------------------------------------------------------------------------------|--------------------------|------|--|--|--|-----------------------------------------------------------------------------------------------------------------------------------------------------------------------------------------------------------------|
| Beytemur et al., 2017 | Time to Union; OMAS; Deep/superficial infection                                                                    | Time to Union = mean weeks; OMAS = final FUP mean 29.4 months; Deep infection = cumulative FUPs until mean 29.4 months                                                                                             | 16.4 ± 2.7 (range 12-24)         | 15.2 ± 1.8 (range 12-20) |          |                                            |              |   | 16.4 ± 2.7 (range 12-24)                                                                                                 | 15.2 ± 1.8 (range 12-20) |      |  |  |  | Anterior knee pain, Varus malunion, Valgus malunion, and Recurvatum malunion were significantly greater with IMN. Ankle dorsiflexion was significantly decreased with IMN.                                      |
|                       |                                                                                                                    |                                                                                                                                                                                                                    | p = 0.079 (independent t-test)   |                          |          |                                            |              |   | p = 0.079 (independent t-test)<br>N.B. Weight-bearing was permitted upon union, so values are the same for both outcomes |                          |      |  |  |  |                                                                                                                                                                                                                 |
| Imren et al., 2017    | Time to union; Complications (inc. infection, hardware removal, delayed union); AOFAS; Time to full weight-bearing | Time to union, time to full weight-bearing = weeks; AOFAS = 1, 2 and 3 years; Delayed union = 6 months; Complications = not specified (likely reviewed cumulatively at routine follow up appointments - see "POI") |                                  | 19.4±2.9                 | 22.1±1.7 |                                            | 6            | 0 |                                                                                                                          | 25.6 ±1.85               | 19.3 |  |  |  |                                                                                                                                                                                                                 |
|                       |                                                                                                                    |                                                                                                                                                                                                                    | P = 0.001* (Mann-Whitney U test) |                          |          | No statistical significance test performed |              |   | No statistical significance test performed                                                                               |                          |      |  |  |  |                                                                                                                                                                                                                 |
| Kawalkar et al., 2018 | Time to Union; Time to partial weight-bearing; AOFAS; Overall complications                                        | Time to Union = mean weeks; Time to partial weight-bearing = mean weeks; AOFAS = final FUP at a minimum of 12 months; Overall complications = Cumulative over at least 12 months                                   | 18 (range 14-24)                 | 19 (range 16-28)         |          | 8                                          | 12           |   |                                                                                                                          |                          |      |  |  |  | Greater nonunion with plate but greater malunion with IMN.                                                                                                                                                      |
|                       |                                                                                                                    |                                                                                                                                                                                                                    | p = 0.85 (independent t-test)    |                          |          | p = 0.01* (independent t-test)             |              |   |                                                                                                                          |                          |      |  |  |  |                                                                                                                                                                                                                 |
| Mahendra et al., 2018 | Time to Union; Time to partial weight-bearing (callus formation); OMAS; Deep/superficial infection                 | Time to Union = mean weeks; Time to partial weight-bearing = mean weeks; OMAS = final FUP 2 years post-op; Deep/superficial infection = cumulative FUPs until 2-year mark                                          | 25.64 ± 4.07                     | 26.60 ± 7.14             |          | 12.00 ± 2.14                               | 13.00 ± 6.34 |   |                                                                                                                          |                          |      |  |  |  | No significant difference in mean angulation or shortening between groups. IMN group had mild anterior knee pain & discomfort when kneeling, and mild pain over screw head. Malunion rates higher in IMN group. |
|                       |                                                                                                                    |                                                                                                                                                                                                                    | p = 0.594 (independent t-test)   |                          |          | P = > 0.05 (independent t-test)            |              |   |                                                                                                                          |                          |      |  |  |  |                                                                                                                                                                                                                 |

*SI2.2.2 – Radiographically assessed data from the non-randomised studies (continued)*

|                         |                                                                                                                |                                                                                                                                                                                                                      |                                 |                            |  |  |  |                                 |                           |  |  |  |  |  |                                                                                                                                                                                                |
|-------------------------|----------------------------------------------------------------------------------------------------------------|----------------------------------------------------------------------------------------------------------------------------------------------------------------------------------------------------------------------|---------------------------------|----------------------------|--|--|--|---------------------------------|---------------------------|--|--|--|--|--|------------------------------------------------------------------------------------------------------------------------------------------------------------------------------------------------|
| Vaianti et al., 2019    | Time to union; Wound problems; Infection; Malunion; Anterior knee pain; Time to full weight-bearing; OMAS; DRI | Time to union, time to full weight-bearing = weeks; DRI, OMAS = 3, 6, 12 months; Infection, anterior knee pain, wound problems, secondary operations = cumulative at final FUP (see "POI")                           | 20.2 (range 16.8-24.2)          | 24.8 (range 18.1-27.5)     |  |  |  |                                 |                           |  |  |  |  |  | No significant difference in malunion/misalignment (including rotational). Greater proportion of knee pain in IMN group but not statistically significant.                                     |
|                         |                                                                                                                |                                                                                                                                                                                                                      | p = 0.271 (Mann-Whitney U test) |                            |  |  |  |                                 |                           |  |  |  |  |  |                                                                                                                                                                                                |
| Say et al., 2020        | Time to union; Median AOFAS; Infection                                                                         | Time to union = weeks; AOFAS / Infection = likely cumulative at final FUP                                                                                                                                            | 18 (range 12-22)                | 15 (range 11-20)           |  |  |  |                                 |                           |  |  |  |  |  | No significant difference in malunion, nonunion, or implant irritation                                                                                                                         |
|                         |                                                                                                                |                                                                                                                                                                                                                      | p = 0.06 (independent t-test)   |                            |  |  |  |                                 |                           |  |  |  |  |  |                                                                                                                                                                                                |
| El Zohairy et al., 2021 | OMAS; Time to full weight-bearing; Time to union; Deep infection rate                                          | OMAS = 6 months; Time to full weight-bearing = Not specified; Deep infection rate = Not specified                                                                                                                    |                                 |                            |  |  |  |                                 |                           |  |  |  |  |  | No significant differences noted in OMAS. Nor in time to union, time to weight bearing or deep infections, despite not reporting any values for these outcomes.                                |
| Keerio et al., 2021     | Time to Union; Time to full weight-bearing; OMAS; Deep infection                                               | Time to Union = mean weeks; Time to full weight-bearing = mean weeks; OMAS = final FUP 1 year after fracture; Deep infection = cumulative FUPs after 6, 12, 18, 24 weeks and every 3 months until final FUP (1 year) | 18.91 ± 1.20 (range 19-23)      | 24.08 ± 1.17 (range 22-30) |  |  |  | 14.4 ± 1.21 (range 14-18)       | 17.5 ± 0.95 (range 17-20) |  |  |  |  |  | Significantly greater range of ankle movement in both plantar- and dorsiflexion for IMN. Some cases of misalignment in IMN, but not plate group. Cases of delayed union higher in plate group. |
|                         |                                                                                                                |                                                                                                                                                                                                                      | P = 0.001* (independent t-test) |                            |  |  |  | P = 0.001* (independent t-test) |                           |  |  |  |  |  |                                                                                                                                                                                                |

*SI2.2.2 – Radiographically assessed data from the non-randomised studies (continued)*

|                       |                                                                                                                         |                                                                                                                                                                                                                                                    |                                  |                            |  |  |  |                                            |                                       |                                                                               |  |                         |                         |  |                                                                                       |
|-----------------------|-------------------------------------------------------------------------------------------------------------------------|----------------------------------------------------------------------------------------------------------------------------------------------------------------------------------------------------------------------------------------------------|----------------------------------|----------------------------|--|--|--|--------------------------------------------|---------------------------------------|-------------------------------------------------------------------------------|--|-------------------------|-------------------------|--|---------------------------------------------------------------------------------------|
| Kumar et al., 2021    | Time to union; Time to full weight-bearing; Superficial infection; Deep infection                                       | Cumulative follow ups until 1-year post-op                                                                                                                                                                                                         | 17.12 ± 1.57                     | 21.28 ± 1.78               |  |  |  |                                            | 8-10 weeks (70%)<br>11-12 weeks (30%) | 8-10 weeks (15%)<br>11-12 weeks (30%)<br>13-14 weeks (40%)<br>>14 weeks (15%) |  |                         |                         |  | More knee stiffness and pain reported in IMN. More ankle stiffness reported in plate. |
|                       |                                                                                                                         |                                                                                                                                                                                                                                                    | P = <0.001* (independent t-test) |                            |  |  |  | No statistical significance test performed |                                       |                                                                               |  |                         |                         |  |                                                                                       |
| Almishri et al., 2022 | Time to Union; Teeny and Wiss functional score; Infection                                                               | Time to Union = mean months; Teeny and Wiss = after 9-month FUP; Infection = measured cumulatively every 4 weeks until final 9-month FUP                                                                                                           | 25.07 ± 6.13                     | 26.55 ± 6.30               |  |  |  |                                            |                                       |                                                                               |  | 84.22 ±20.13            | 80.77 ±18.32            |  | More nonunion in IMN but more deformities and delayed union in plate.                 |
|                       |                                                                                                                         |                                                                                                                                                                                                                                                    | p = 0.654 (independent t-test)   |                            |  |  |  |                                            |                                       | P =0.767 (independent t-test)                                                 |  |                         |                         |  |                                                                                       |
| Bleeker et al., 2022  | Complications (infection, malalignment, secondary operations); Median time to full weight bearing; Median time to union | Median time to union = months; Median time to full weight bearing = months; Infection (and secondary operations, anterior knee pain, range of motion) = not specified (likely reviewed cumulatively at routine follow up appointments - see "POI") | 28.68 median (IQR 29.98)         | 24.78 median (IQR 15.21)   |  |  |  |                                            | 14.77 median (IQR 13.47)              | 16.51 median (IQR 12.17)                                                      |  |                         |                         |  | Insignificant differences in malalignment (rotational + angular)                      |
|                       |                                                                                                                         |                                                                                                                                                                                                                                                    | p = 0.03* (Mann-Whitney U test)  |                            |  |  |  |                                            | P = 0.57 (Mann-Whitney U test)        |                                                                               |  |                         |                         |  |                                                                                       |
| Sharma et al., 2022   | Time to Union; Teeny and Wiss functional score; Superficial infection; Deep Infection                                   | Time to Union = mean weeks; Teeny and Wiss functional score; Superficial infection; Deep Infection                                                                                                                                                 | 22.8 ± 5.40 (range 15-24)        | 23.74 ± 6.85 (range 16-24) |  |  |  |                                            |                                       |                                                                               |  | 84.36 ±8.78 at 9 months | 84.12 ±9.65 at 9 months |  | Very minor differences in malunion and delayed union.                                 |
|                       |                                                                                                                         |                                                                                                                                                                                                                                                    | P = >0.05 (Mann-Whitney U test)  |                            |  |  |  |                                            |                                       | P = >0.05 (Mann-Whitney U test)                                               |  |                         |                         |  |                                                                                       |



SI2.2.2 – Radiographically assessed data from the non-randomised studies (continued)

|                      |                                                                                                                                                  |                                                                                                                                                                                                                                                                        |                                 |                       |                          |                                                                                |      |  |                                                                                |                        |  |                                              |                                              |  |                                                                                                                                                          |
|----------------------|--------------------------------------------------------------------------------------------------------------------------------------------------|------------------------------------------------------------------------------------------------------------------------------------------------------------------------------------------------------------------------------------------------------------------------|---------------------------------|-----------------------|--------------------------|--------------------------------------------------------------------------------|------|--|--------------------------------------------------------------------------------|------------------------|--|----------------------------------------------|----------------------------------------------|--|----------------------------------------------------------------------------------------------------------------------------------------------------------|
| Bastías et al., 2023 | Overall complications (inc. Superficial infection and deep infection); Time to union                                                             | Overall complications = Cumulative over 2 years post-op; Time to union = mean weeks                                                                                                                                                                                    |                                 | 18.4 (range 9.8 - 52) | 27.3 (range 13.2 - 39.2) |                                                                                |      |  |                                                                                |                        |  |                                              |                                              |  | More malunion/misalignment in plate compared to frame.                                                                                                   |
|                      |                                                                                                                                                  |                                                                                                                                                                                                                                                                        | p = 0.009* (independent t-test) |                       |                          |                                                                                |      |  |                                                                                |                        |  |                                              |                                              |  |                                                                                                                                                          |
| Kaya et al., 2023    | Time to union; Complications (inc. wound problems, infection, Sudeck atrophy); AOFAS; Teeny-Wiss radiological score; Time to full weight bearing | Wound problems = Last-follow up (time not specified); Time to union = weeks; Time to full weight bearing and return to daily life = days; Complications, Teeny-Wiss score = not specified (likely reviewed cumulatively at routine follow up appointments - see "POI") | 16 median (IQR 7)               | 12 median (IQR 7.5)   |                          |                                                                                |      |  | 4.29 median (IQR 3.43)                                                         | 6.79 median (IQR 2.14) |  | 47.8% anatomic at final follow up (12 month) | 33.3% anatomic at final follow up (12 month) |  |                                                                                                                                                          |
|                      |                                                                                                                                                  |                                                                                                                                                                                                                                                                        | p = 0.104 (Mann-Whitney U test) |                       |                          |                                                                                |      |  | P = <0.001* (Mann-Whitney U test)                                              |                        |  | P = 0.03* (Chi-squared test)                 |                                              |  |                                                                                                                                                          |
| Kumar et al., 2023   | Time to weight bearing; Ankle score; Deep/superficial infection                                                                                  | Time to weight bearing = delayed vs immediate; Ankle score = not recorded; Deep infection = cumulative FUPs (mean FUP 10 months)                                                                                                                                       |                                 |                       |                          | 4.2                                                                            | 7.12 |  | 9.6                                                                            | 13.42                  |  |                                              |                                              |  | Entire plating group had delayed union and much less in the IMN group. Malunion rate higher in the nail group. Nonunion was higher in the plating group. |
|                      |                                                                                                                                                  |                                                                                                                                                                                                                                                                        |                                 |                       |                          | Reported significant difference without explicit p values (independent t-test) |      |  | Reported significant difference without explicit p values (independent t-test) |                        |  |                                              |                                              |  |                                                                                                                                                          |
| Nath et al., 2023    | Time to union; AOFAS; Infection                                                                                                                  | Time to union = weeks; AOFAS, Infection = 1 year (cumulative appointments at 6 weeks, 12 weeks, 6 months and 1 year)                                                                                                                                                   | 18.29 ± 2.13                    | 21.07 ± 2.05          |                          |                                                                                |      |  |                                                                                |                        |  |                                              |                                              |  | Nonunion had insignificant difference.                                                                                                                   |
|                      |                                                                                                                                                  |                                                                                                                                                                                                                                                                        | p = > 0.05 (independent t-test) |                       |                          |                                                                                |      |  |                                                                                |                        |  |                                              |                                              |  |                                                                                                                                                          |

SI2.2.2 – Radiographically assessed data from the non-randomised studies (continued)

|                       |                                                                                   |                                                                                                                                                                          |                                                        |           |           |                                                        |      |  |                                                        |              |        |  |  |                                                                                                                                                                                                                          |
|-----------------------|-----------------------------------------------------------------------------------|--------------------------------------------------------------------------------------------------------------------------------------------------------------------------|--------------------------------------------------------|-----------|-----------|--------------------------------------------------------|------|--|--------------------------------------------------------|--------------|--------|--|--|--------------------------------------------------------------------------------------------------------------------------------------------------------------------------------------------------------------------------|
| M. Singh et al., 2023 | Time to union; Time to partial weight-bearing; Time to full weight-bearing; AOFAS | Time to union = mean weeks; Time to partial weight-bearing = mean days; Time to full weight-bearing = mean weeks; AOFAS = measured at final FUP (24 weeks)               | 14.93                                                  | 18        |           | 1.47                                                   | 2.65 |  | 2.87                                                   | 6.07         |        |  |  |                                                                                                                                                                                                                          |
|                       |                                                                                   |                                                                                                                                                                          | p = < 0.05* (statistical significance test not stated) |           |           | p = < 0.05* (statistical significance test not stated) |      |  | p = < 0.05* (statistical significance test not stated) |              |        |  |  |                                                                                                                                                                                                                          |
| S. Singh et al., 2023 | Superficial infection; Deep infection                                             | Both recorded cumulatively until final FUP at 24-weeks                                                                                                                   |                                                        |           |           |                                                        |      |  |                                                        |              |        |  |  | Varus/valgus angulation, knee stiffness, ankle stiffness, nonunion, delayed union, and malunion all had insignificant differences. Deep infection and anterior knee pain the only significantly different complications. |
|                       | Time to Union; AOFAS; Overall complications                                       | Time to Union = not reported; AOFAS = final FUP 12 months; Overall complications = cumulative FUPs (minimum 12 months)                                                   |                                                        |           |           |                                                        |      |  |                                                        |              |        |  |  | Ankle stiffness, nonunion, varus deformity, and valgus deformity were compared. There was no significant difference in overall complications of deformities.                                                             |
| Tukade, 2023          | Time to union; Time to weight bearing; OMAS; Deep/superficial infection           | Time to union = mean weeks; Time to weight bearing = mean weeks; OMAS = measured at final FUP (1-year); Deep/superficial infection = cumulative until final FUP (1-year) | 19.36 ± 2.42                                           | 21 ± 1.92 | 24 ± 1.63 |                                                        |      |  | 11.09 ± 1.57                                           | 13.86 ± 2.13 | 12 ± 0 |  |  | No cases of nonunion. No cases of delayed union. No cases of malunion. Ankle stiffness was IMN<CF<Plate                                                                                                                  |
|                       |                                                                                   |                                                                                                                                                                          | p = 0.002* (ANOVA test)                                |           |           |                                                        |      |  | P = <0.000001* (ANOVA test)                            |              |        |  |  |                                                                                                                                                                                                                          |

*S12.2.2 – Radiographically assessed data from the non-randomised studies (continued)*

|                       |                                                                                                                             |                                                                                                                                                                                                            |                                 |                |  |  |  |                                 |           |  |  |  |  |  |                                                                                                                                          |
|-----------------------|-----------------------------------------------------------------------------------------------------------------------------|------------------------------------------------------------------------------------------------------------------------------------------------------------------------------------------------------------|---------------------------------|----------------|--|--|--|---------------------------------|-----------|--|--|--|--|--|------------------------------------------------------------------------------------------------------------------------------------------|
| Wang et al.,<br>2023  | AOFAS;<br>Time to union;<br>Superficial and deep infection                                                                  | AOFAS = 12 months; Time to union = days; Superficial and deep infection = not specified (likely reviewed cumulatively at routine follow up appointments - see "POI")                                       | 19.83<br>±1.57                  | 21.93<br>±2.44 |  |  |  |                                 |           |  |  |  |  |  | Insignificant differences in malalignment (rotational + angular)                                                                         |
|                       |                                                                                                                             |                                                                                                                                                                                                            | p = 0.000* (independent t-test) |                |  |  |  |                                 |           |  |  |  |  |  |                                                                                                                                          |
| Jang et al.,<br>2024  | Infection;<br>PROs (PROMIS)                                                                                                 | Reduction loss = 6 weeks; Nonunion = 6 months; PROs (PROMIS) = 2 weeks, 6 weeks, 12 weeks, 6 months, and 12 months; Infection = not specified                                                              |                                 |                |  |  |  |                                 |           |  |  |  |  |  | No significant difference in Patient Reported Outcomes (PROMIS).                                                                         |
| Liu et al.,<br>2024   | Time to union; Time to full weight-bearing; AOFAS; Complications (inc. infection, delayed union, nonunion, implant failure) | Time to union, time to full weight-bearing = weeks; AOFAS = not specified (at final follow up); Complications = not specified (likely reviewed cumulatively at routine follow up appointments - see notes) | 14.9 ± 2.3                      | 15.4 ± 2.3     |  |  |  | 9.9±1.3                         | 11.5 ±1.5 |  |  |  |  |  | Significantly more people with fair and poor AOFAS scores in MIPO group.                                                                 |
|                       |                                                                                                                             |                                                                                                                                                                                                            | p = 0.46 (independent t-test)   |                |  |  |  | P = 0.001* (independent t-test) |           |  |  |  |  |  |                                                                                                                                          |
| Rafiq et al.,<br>2024 | Time to Union; AOFAS; Deep/superficial infection; Overall complications                                                     | Time to Union = mean weeks; AOFAS = final FUP minimum 12 months; Deep infection = cumulative FUPs (minimum 12 months)                                                                                      | 15.1 ± 2.1                      | 16.2 ± 2.4     |  |  |  |                                 |           |  |  |  |  |  | Malalignment: Plate<IMN. Delayed union: Plate<IMN. Nonunion: Plate<IMN. Alignment control was significantly better in the plating group. |
|                       |                                                                                                                             |                                                                                                                                                                                                            | p = 0.12 (independent t-test)   |                |  |  |  |                                 |           |  |  |  |  |  |                                                                                                                                          |

SI2.2.2 – Radiographically assessed data from the non-randomised studies (continued)

|                     |                                                                                                                                                                                              |                                                                                                                                                |                                                     |              |              |  |  |  |  |  |  |  |  |  |  |                                                                                                                                            |
|---------------------|----------------------------------------------------------------------------------------------------------------------------------------------------------------------------------------------|------------------------------------------------------------------------------------------------------------------------------------------------|-----------------------------------------------------|--------------|--------------|--|--|--|--|--|--|--|--|--|--|--------------------------------------------------------------------------------------------------------------------------------------------|
| Shaikh et al., 2024 | DRI; Patient satisfaction (SF-12); AOFAS; Malalignment; Time to union; Complications (inc. infection, secondary operations, malunion, nonunion, secondary arthritis, amputations, DVT, CRPS) | DRI, SF12, AOFAS = 3, 6, 12 months; Complications = not specified (likely reviewed cumulatively at routine follow up appointments - see "POI") |                                                     | 16.00 ± 1.85 | 15.92 ± 1.74 |  |  |  |  |  |  |  |  |  |  | Greater proportion of malunion and secondary operations in the Ilizarov group.                                                             |
|                     |                                                                                                                                                                                              |                                                                                                                                                | p = 0.89 (statistical significance test not stated) |              |              |  |  |  |  |  |  |  |  |  |  |                                                                                                                                            |
| Singh et al., 2025  | AOFAS                                                                                                                                                                                        | AOFAS = minimum of 6-month follow-up                                                                                                           |                                                     |              |              |  |  |  |  |  |  |  |  |  |  | Nonunion:<br>IMN<CF=Plate.<br>Ankle stiffness:<br>Plate<CF=IMN.<br>Varus deformity:<br>Plate<CF<IMN.<br>Valgus deformity:<br>IMN<Plate<CF. |

### SI2.2.3 – Patient-assessed data from the non-randomised studies

| Study                    | Main relevant Outcomes                                              | Outcome Timepoints                                                                                                              | AOFAS |       |                | OMAS                                           |                                                 |                | Other                                                                                           |                                                                     |                                                             | Points of interest                                                                                                                                                                                                  |
|--------------------------|---------------------------------------------------------------------|---------------------------------------------------------------------------------------------------------------------------------|-------|-------|----------------|------------------------------------------------|-------------------------------------------------|----------------|-------------------------------------------------------------------------------------------------|---------------------------------------------------------------------|-------------------------------------------------------------|---------------------------------------------------------------------------------------------------------------------------------------------------------------------------------------------------------------------|
|                          |                                                                     |                                                                                                                                 | IMN   | Plate | Circular frame | IMN                                            | Plate                                           | Circular frame | IMN                                                                                             | Plate                                                               | Circular frame                                              |                                                                                                                                                                                                                     |
| Harris et al., 2006      | Complications (inc. wound problems, superficial and deep infection) | Complications = cumulative to final FUP                                                                                         |       |       |                |                                                |                                                 |                |                                                                                                 | FFI: 0.23;<br><br>MFA: 20.9 at mean 88 months after surgery         | FFI: 0.40;<br><br>MFA: 34.0 at mean 88 months after surgery | ORIF associated with fewer complications and less post-traumatic arthritis                                                                                                                                          |
|                          |                                                                     |                                                                                                                                 |       |       |                |                                                |                                                 |                | FFI: p = 0.03*<br>MFA: statistical significance test not used to compare between fixation types |                                                                     |                                                             |                                                                                                                                                                                                                     |
| Yang et al., 2006        | OMAS; Time to union                                                 | Time to union = weeks; OMAS, Malalignment, Malunion, Anterior knee pain = not specified (final FUP ≈ 33months)                  |       |       |                | 86.2±3.2 at final follow up (mean ≈ 33 months) | 83.9 ±7.1 at final follow up (mean ≈ 33 months) |                | Iowa Ankle Score: Excellent = 38.5%<br>Good = 53.8%<br>Fair = 7.7%                              | Iowa Ankle Score: Excellent = 35.5%<br>Good = 42.9%<br>Fair = 21.4% |                                                             | No significant difference in Iowa ankle score nor malunion/misalignment (rotational was not measured). Anterior knee pain reported in some IMN patients compared none in the Plate group.                           |
|                          |                                                                     |                                                                                                                                 |       |       |                | P = 0.644 (Mann-Whitney U test)                |                                                 |                | P = 0.594 (Chi-Squared test)                                                                    |                                                                     |                                                             |                                                                                                                                                                                                                     |
| Janssen et al., 2007     | Time to union; Infection; Time to weight-bearing                    | Time to union, time to weight-bearing = mean weeks; Infection (likely cumulative at final FUP - see points of interest ["POI"]) |       |       |                |                                                |                                                 |                | Knee Society Score (KSS): 139                                                                   | Knee Society Score (KSS): 146                                       |                                                             | Main reason for plate removal was because patients "felt it there". Main reason for IMN removal was knee pain. Insignificant differences in malalignment/malunion (including rotational), despite their hypotheses. |
|                          |                                                                     |                                                                                                                                 |       |       |                |                                                |                                                 |                | No statistical significance test performed                                                      |                                                                     |                                                             |                                                                                                                                                                                                                     |
| Koulouvaris et al., 2007 | Time to union; Infection                                            | Time to union = months; Infection = 1 week, 1 month, monthly for 12 months & annual follow-up (cumulative)                      |       |       |                |                                                |                                                 |                |                                                                                                 |                                                                     |                                                             | Significant relationship with the type of fracture and infection. No malunions or nonunions.                                                                                                                        |

*SI2.2.3 – Patient-assessed data from the non-randomised studies (continued)*

|                      |                                                                                            |                                                                                                                                                                                                    |  |  |  |                                |            |  |                                            |                                                                                                 |                                                                     |                                                                                                                                                                                                                                 |
|----------------------|--------------------------------------------------------------------------------------------|----------------------------------------------------------------------------------------------------------------------------------------------------------------------------------------------------|--|--|--|--------------------------------|------------|--|--------------------------------------------|-------------------------------------------------------------------------------------------------|---------------------------------------------------------------------|---------------------------------------------------------------------------------------------------------------------------------------------------------------------------------------------------------------------------------|
| Vallier et al., 2008 | Complications (inc. infection)                                                             | Infection = cumulative at final FUP                                                                                                                                                                |  |  |  |                                |            |  |                                            |                                                                                                 |                                                                     | Significantly greater malunion following IMN malalignment. IMN also had significantly greater procedures other than hardware removal (reasons including malalignment).                                                          |
| Li et al., 2012      | Time to Union; Time to full weight-bearing; OMAS; Deep infection; Superficial infection    | Time to union = mean weeks; Time to full weight-bearing = mean weeks; OMAS = measured at final FUP (25.2 weeks); Infection rates measured cumulatively until final FUP (25.2 weeks between groups) |  |  |  | 89.0 ± 7.1                     | 87.6 ± 8.4 |  |                                            |                                                                                                 |                                                                     | No significant differences in anterior knee pain or malalignment. No cases of nonunion, implant failure or delayed union. No significant differences in mean postoperative varus/valgus angulation, ante-/recurvatum alignment. |
|                      |                                                                                            |                                                                                                                                                                                                    |  |  |  | P = 0.478 (independent t-test) |            |  |                                            |                                                                                                 |                                                                     |                                                                                                                                                                                                                                 |
| Seyhan et al., 2012  | Time to union; Time to full weight-bearing; Deep infection; Deep and superficial infection | Time to union = mean weeks; Time to full weight-bearing = mean weeks; Infections= measured cumulatively until final FUP (mean 21.4 months)                                                         |  |  |  |                                |            |  |                                            |                                                                                                 |                                                                     | No statistically significant difference in rates of nonunion, malunion or implant irritation. Rate of secondary procedures significantly higher in plate compared to IMN.                                                       |
| Fadel et al., 2014   | Time to union; Time to partial weight-bearing; Time to full weight-bearing; AOFAS          | Time to union = mean weeks; Time to partial weight-bearing = mean days; Time to full weight-bearing = mean weeks; AOFAS = measured at final FUP (24 weeks)                                         |  |  |  |                                |            |  |                                            | <b>Modified Mazur Ankle Score:</b><br>Excellent = 10%<br>Good = 40%<br>Fair = 20%<br>Poor = 30% | <b>Modified Mazur Ankle Score:</b><br>Excellent = 50%<br>Good = 50% | No cases of delayed union or nonunion in the CF group (significant difference).                                                                                                                                                 |
|                      |                                                                                            |                                                                                                                                                                                                    |  |  |  |                                |            |  | No statistical significance test performed |                                                                                                 |                                                                     |                                                                                                                                                                                                                                 |

S12.2.3 – Patient-assessed data from the non-randomised studies (continued)

|                     |                                                                                                                                                                             |                                                                                                                                                                                                                             |                                               |                                               |  |  |  |  |  |  |  |                                                                                                                                                                                 |
|---------------------|-----------------------------------------------------------------------------------------------------------------------------------------------------------------------------|-----------------------------------------------------------------------------------------------------------------------------------------------------------------------------------------------------------------------------|-----------------------------------------------|-----------------------------------------------|--|--|--|--|--|--|--|---------------------------------------------------------------------------------------------------------------------------------------------------------------------------------|
| Ali et al., 2015    | Time to union;<br>Time to full weight-bearing;<br>AOFAS;<br>Superficial infection; Deep infection                                                                           | Time to union = mean weeks; Time to full weight-bearing = mean weeks; AOFAS = at final FUP?; Superficial + Deep infection cumulative to final follow-up (mean FUP was 34.2 months between groups)                           | 92.9 (75–98)                                  | 89.8 (70–96)                                  |  |  |  |  |  |  |  | No difference in rotational malalignment and insignificantly greater angular malalignment in the MIPO group vs IMN. None of these malalignments required secondary operation.   |
|                     |                                                                                                                                                                             |                                                                                                                                                                                                                             | P = 0.0219* (paired t-test)                   |                                               |  |  |  |  |  |  |  |                                                                                                                                                                                 |
| Jöstl et al., 2015  | Time to union;<br>Overall complication rate (inc. nonunion, implant irritation, painful scar, post-traumatic arthritis, refracture, compartment syndrome, Sudeck's disease) | Time to union = days; Overall complication rate = cumulative at final FUP                                                                                                                                                   |                                               |                                               |  |  |  |  |  |  |  | No significant differences in malunion, post-traumatic arthritis, refracture, painful/broken interlocking screw, or range of motion in the knee joint between the three groups. |
| Ali et al., 2016    | Time to Union;<br>Time to partial weight-bearing;<br>Time to full weight-bearing;<br>Teeny and Wiss;<br>Deep/superficial infection                                          | Time to Union = mean weeks; Time to partial weight-bearing = mean weeks; Time to full weight-bearing = mean weeks; Teeny and Wiss = final FUP 9 months post-op; Deep/superficial infection = cumulative FUPs until 9 months |                                               |                                               |  |  |  |  |  |  |  | Malunion, Delayed union, Ankle stiffness, Anterior knee pain, and Nonunion were measured. None of these were statistically significant using Fisher's test.                     |
| Barcak et al., 2016 | AOFAS; SF-36;<br>Time to union;<br>Superficial infections                                                                                                                   | Time to union = weeks; AOFAS, SF-36 = at minimum of 1 year follow up; Infection = cumulative at final FUP                                                                                                                   | 88.4±11.0 at final follow up (minimum 1 year) | 86.6±11.0 at final follow up (minimum 1 year) |  |  |  |  |  |  |  | Quantitatively higher scores in Short Form 36 scores in the IMN group but no significant difference. No significant difference in malalignment (rotational not measured).       |
|                     |                                                                                                                                                                             |                                                                                                                                                                                                                             | P = 0.24 (independent t-test)                 |                                               |  |  |  |  |  |  |  |                                                                                                                                                                                 |

*SI2.2.3 – Patient-assessed data from the non-randomised studies (continued)*

|                       |                                                                                                                    |                                                                                                                                                                                                                    |                               |                                                                                                                              |                                                                            |                                      |                                      |  |  |  |  |                                                                                                                                                                                                                 |
|-----------------------|--------------------------------------------------------------------------------------------------------------------|--------------------------------------------------------------------------------------------------------------------------------------------------------------------------------------------------------------------|-------------------------------|------------------------------------------------------------------------------------------------------------------------------|----------------------------------------------------------------------------|--------------------------------------|--------------------------------------|--|--|--|--|-----------------------------------------------------------------------------------------------------------------------------------------------------------------------------------------------------------------|
| Shen et al., 2016     | Wound complications                                                                                                | Cumulative until final FUP at 12 months (FUP 6, 10, 14 weeks, then every 6–8 weeks)                                                                                                                                |                               |                                                                                                                              |                                                                            |                                      |                                      |  |  |  |  | Malreduction / deformity (inc. valgus/varus, ante-/recurvation, rotation): significantly higher in IMN. No cases of shortening or nonunion.                                                                     |
| Beytemur et al., 2017 | Time to Union; OMAS; Deep/superficial infection                                                                    | Time to Union = mean weeks; OMAS = final FUP mean 29.4 months; Deep infection = cumulative FUPs until mean 29.4 months                                                                                             |                               |                                                                                                                              |                                                                            | 87.2 ± 8.1                           | 81.5 ± 11.8                          |  |  |  |  | Anterior knee pain, Varus malunion, Valgus malunion, and Recurvatum malunion were significantly greater with IMN. Ankle dorsiflexion was significantly decreased with IMN.                                      |
|                       |                                                                                                                    |                                                                                                                                                                                                                    |                               |                                                                                                                              |                                                                            | P = 0.013* (independent t-test)      |                                      |  |  |  |  |                                                                                                                                                                                                                 |
| Imren et al., 2017    | Time to union; Complications (inc. infection, hardware removal, delayed union); AOFAS; Time to full weight-bearing | Time to union, time to full weight-bearing = weeks; AOFAS = 1, 2 and 3 years; Delayed union = 6 months; Complications = not specified (likely reviewed cumulatively at routine follow up appointments - see "POI") |                               | 12 months = 86.38±2.06<br>24 months = 79.47±1.03<br>36 months = 77.95±0.80                                                   | 12 months = 86.57±1.69<br>24 months = 82.09±0.77<br>36 months = 79.67±1.06 |                                      |                                      |  |  |  |  |                                                                                                                                                                                                                 |
|                       |                                                                                                                    |                                                                                                                                                                                                                    |                               | Year 1: p = 0.745 (independent t-test)<br>Year 2: p = 0.001* (independent t-test)<br>Year 3: p = 0.001* (independent t-test) |                                                                            |                                      |                                      |  |  |  |  |                                                                                                                                                                                                                 |
| Kawalkar et al., 2018 | Time to Union; Time to partial weight-bearing; AOFAS; Overall complications                                        | Time to Union = mean weeks; Time to partial weight-bearing = mean weeks; AOFAS = final FUP at a minimum of 12 months; Overall complications = Cumulative over at least 12 months                                   | 91.10% at 12 months           | 88.90% at 12 months                                                                                                          |                                                                            |                                      |                                      |  |  |  |  | Greater nonunion with plate but greater malunion with IMN.                                                                                                                                                      |
|                       |                                                                                                                    |                                                                                                                                                                                                                    | P = 0.31 (independent t-test) |                                                                                                                              |                                                                            |                                      |                                      |  |  |  |  |                                                                                                                                                                                                                 |
| Mahendra et al., 2018 | Time to Union; Time to partial weight-bearing (callus formation); OMAS; Deep/superficial infection                 | Time to Union = mean weeks; Time to partial weight-bearing = mean weeks; OMAS = final FUP 2 years post-op; Deep/superficial infection = cumulative FUPs until 2-year mark                                          |                               |                                                                                                                              |                                                                            | 82.4±11.5 (range 60-95) at 24 months | 81.5±12.9 (range 40-95) at 24 months |  |  |  |  | No significant difference in mean angulation or shortening between groups. IMN group had mild anterior knee pain & discomfort when kneeling, and mild pain over screw head. Malunion rates higher in IMN group. |
|                       |                                                                                                                    |                                                                                                                                                                                                                    |                               |                                                                                                                              |                                                                            | P = 0.802 (independent t-test)       |                                      |  |  |  |  |                                                                                                                                                                                                                 |



SI2.2.3 – Patient-assessed data from the non-randomised studies (continued)

|                         |                                                                                                                |                                                                                                                                                                                                                   |                                                                          |                                                                          |  |                                                                                                     |                                                                                                     |  |                                                                                                                   |                                                                                                                   |  |                                                                                                                                                                                                 |
|-------------------------|----------------------------------------------------------------------------------------------------------------|-------------------------------------------------------------------------------------------------------------------------------------------------------------------------------------------------------------------|--------------------------------------------------------------------------|--------------------------------------------------------------------------|--|-----------------------------------------------------------------------------------------------------|-----------------------------------------------------------------------------------------------------|--|-------------------------------------------------------------------------------------------------------------------|-------------------------------------------------------------------------------------------------------------------|--|-------------------------------------------------------------------------------------------------------------------------------------------------------------------------------------------------|
| Vaienti et al., 2019    | Time to union; Wound problems; Infection; Malunion; Anterior knee pain; Time to full weight-bearing; OMAS; DRI | Time to union, time to full weight-bearing = weeks; DRI, OMAS = 3, 6, 12 months; Infection, anterior knee pain, wound problems, secondary operations = cumulative at final FUP (see "POI")                        |                                                                          |                                                                          |  | 3 months = 49.8 (range: 40-62)<br>6 months = 68.3 (range: 56-81)<br>12 months = 79.6 (range: 67-89) | 3 months = 34.2 (range: 28-51)<br>6 months = 59.1 (range: 49-70)<br>12 months = 34.2 (range: 65-91) |  | <b>DRI:</b><br>3 months = 40.6 (range: 32-59)<br>6 months = 21.5 (range: 13-38)<br>12 months = 11.8 (range: 6-18) | <b>DRI:</b><br>3 months = 56.7 (range: 42-65)<br>6 months = 30.3 (range: 18-39)<br>12 months = 14.3 (range: 8-24) |  | No significant difference in malunion/misalignment (including rotational). Greater proportion of knee pain in IMN group but not statistically significant.                                      |
|                         |                                                                                                                |                                                                                                                                                                                                                   |                                                                          |                                                                          |  | P = 0.008* (Mann-Whitney U test)                                                                    |                                                                                                     |  | DRI 3 months: p = 0.005*<br>DRI 6 months = 0.098<br>DRI 12 months = 0.326 (Mann-Whitney U test)                   |                                                                                                                   |  |                                                                                                                                                                                                 |
| Say et al., 2020        | Time to union; Median AOFAS; Infection                                                                         | Time to union = weeks; AOFAS / Infection = likely cumulative at final FUP                                                                                                                                         | 82 (range, 65-90) at final follow up (median follow up period 10 months) | 84 (range, 47-90) at final follow up (median follow up period 11 months) |  |                                                                                                     |                                                                                                     |  |                                                                                                                   |                                                                                                                   |  | No significant difference in malunion, nonunion, or implant irritation                                                                                                                          |
|                         |                                                                                                                |                                                                                                                                                                                                                   | P = 0.974 (Mann-Whitney U test)                                          |                                                                          |  |                                                                                                     |                                                                                                     |  |                                                                                                                   |                                                                                                                   |  |                                                                                                                                                                                                 |
| El Zohairy et al., 2021 | OMAS; Time to full weight-bearing; Time to union; Deep infection rate                                          | OMAS = 6 months; Time to full weight-bearing = Not specified; Deep infection rate = Not specified                                                                                                                 |                                                                          |                                                                          |  | 6 months = 80.42 ± 28.4                                                                             | 6 months = 85.42 ± 23.98                                                                            |  |                                                                                                                   |                                                                                                                   |  | No significant differences noted in OMAS. Nor in time to union, time to weight bearing or deep infections, despite not reporting any values for these outcomes.                                 |
|                         |                                                                                                                |                                                                                                                                                                                                                   |                                                                          |                                                                          |  | P = 0.646 (independent t-test)                                                                      |                                                                                                     |  |                                                                                                                   |                                                                                                                   |  |                                                                                                                                                                                                 |
| Keerio et al., 2021     | Time to Union; Time to full weight-bearing; OMAS; Deep infection                                               | Time to Union = mean weeks; Time to full weight-bearing = mean weeks; OMAS = final FUP 1 year after fracture; Deep infection = cumulative FUPs after 6,12,18,24 weeks and every 3 months until final FUP (1 year) |                                                                          |                                                                          |  | 84.50%                                                                                              | 75.30%                                                                                              |  |                                                                                                                   |                                                                                                                   |  | Significantly greater range of ankle movement in both plantar- and dorsi-flexion for IMN. Some cases of misalignment in IMN, but not plate group. Cases of delayed union higher in plate group. |
|                         |                                                                                                                |                                                                                                                                                                                                                   |                                                                          |                                                                          |  | P = 0.383 (independent t-test)                                                                      |                                                                                                     |  |                                                                                                                   |                                                                                                                   |  |                                                                                                                                                                                                 |

SI2.2.3 – Patient-assessed data from the non-randomised studies (continued)

|                       |                                                                                                                         |                                                                                                                                                                                                                                                    |  |  |  |  |  |  |  |  |  |                                                                                       |
|-----------------------|-------------------------------------------------------------------------------------------------------------------------|----------------------------------------------------------------------------------------------------------------------------------------------------------------------------------------------------------------------------------------------------|--|--|--|--|--|--|--|--|--|---------------------------------------------------------------------------------------|
| Kumar et al., 2021    | Time to union;<br>Time to full weight-bearing;<br>Superficial infection; Deep infection                                 | Cumulative follow ups until 1 year post-op                                                                                                                                                                                                         |  |  |  |  |  |  |  |  |  | More knee stiffness and pain reported in IMN. More ankle stiffness reported in plate. |
| Almishri et al., 2022 | Time to Union; Teeny and Wiss functional score; Infection                                                               | Time to Union = mean months; Teeny and Wiss = after 9-month FUP; Infection = measured cumulatively every 4 weeks until final 9-month FUP                                                                                                           |  |  |  |  |  |  |  |  |  | More nonunion in IMN but more deformities and delayed union in plate.                 |
| Bleeker et al., 2022  | Complications (infection, malalignment, secondary operations); Median time to full weight bearing; Median time to union | Median time to union = months; Median time to full weight bearing = months; Infection (and secondary operations, anterior knee pain, range of motion) = not specified (likely reviewed cumulatively at routine follow up appointments - see "POI") |  |  |  |  |  |  |  |  |  | Insignificant differences in malalignment (rotational + angular)                      |
| Sharma et al., 2022   | Time to Union; Teeny and Wiss functional score; Superficial infection; Deep Infection                                   | Time to Union = mean weeks; Teeny and Wiss functional score; Superficial infection; Deep Infection                                                                                                                                                 |  |  |  |  |  |  |  |  |  | Very minor differences in malunion and delayed union.                                 |
| Bastias et al., 2023  | Overall complications (inc. Superficial infection and deep infection); Time to union                                    | Overall complications = Cumulative over 2 years post-op; Time to union = mean weeks                                                                                                                                                                |  |  |  |  |  |  |  |  |  | More malunion/misalignment in plate compared to frame.                                |

SI2.2.3 – Patient-assessed data from the non-randomised studies (continued)

|                       |                                                                                                                                                  |                                                                                                                                                                                                                                                                        |                                                                       |                                                                        |  |  |  |  |  |  |  |                                                                                                                                                                                                                          |
|-----------------------|--------------------------------------------------------------------------------------------------------------------------------------------------|------------------------------------------------------------------------------------------------------------------------------------------------------------------------------------------------------------------------------------------------------------------------|-----------------------------------------------------------------------|------------------------------------------------------------------------|--|--|--|--|--|--|--|--------------------------------------------------------------------------------------------------------------------------------------------------------------------------------------------------------------------------|
| Kaya et al., 2023     | Time to union; Complications (inc. wound problems, infection, Sudeck atrophy); AOFAS; Teeny-Wiss radiological score; Time to full weight bearing | Wound problems = Last-follow up (time not specified); Time to union = weeks; Time to full weight bearing and return to daily life = days; Complications, Teeny-Wiss score = not specified (likely reviewed cumulatively at routine follow up appointments - see "POI") | 95.8 ± 5.0 at final follow up (mean follow up period 13.3±6.0 months) | 91.9 ± 14.3 at final follow up (mean follow up period 13.3±6.0 months) |  |  |  |  |  |  |  |                                                                                                                                                                                                                          |
|                       |                                                                                                                                                  |                                                                                                                                                                                                                                                                        | P = 0.019* (Mann-Whitney U test)                                      |                                                                        |  |  |  |  |  |  |  |                                                                                                                                                                                                                          |
| Kumar et al., 2023    | Time to weight bearing; Ankle score; Deep/superficial infection                                                                                  | Time to weight bearing = delayed vs immediate; Ankle score = not recorded; Deep infection = cumulative FUPs (mean FUP 10 months)                                                                                                                                       |                                                                       |                                                                        |  |  |  |  |  |  |  | Entire plating group had delayed union and much less in the IMN group. Malunion rate higher in the nail group. Nonunion was higher in the plating group.                                                                 |
| Nath et al., 2023     | Time to union; AOFAS; Infection                                                                                                                  | Time to union = weeks; AOFAS, Infection = 1 year (cumulative appointments at 6 weeks, 12 weeks, 6 months and 1 year)                                                                                                                                                   | 92.6±5.41 mean score taken at 6, 12 weeks, 6, 12 months & 1 year      | 91.2±6.81 mean score taken at 6, 12 weeks, 6, 12 months & 1 year       |  |  |  |  |  |  |  | Nonunion had insignificant difference.                                                                                                                                                                                   |
|                       |                                                                                                                                                  |                                                                                                                                                                                                                                                                        | P = > 0.05 (independent t-test)                                       |                                                                        |  |  |  |  |  |  |  |                                                                                                                                                                                                                          |
| M. Singh et al., 2023 | Time to union; Time to partial weight-bearing; Time to full weight-bearing; AOFAS                                                                | Time to union = mean weeks; Time to partial weight-bearing = mean days; Time to full weight-bearing = mean weeks; AOFAS = measured at final FUP (24 weeks)                                                                                                             | Score 90-99 = 53.34%<br>Score 80-89 = 33.33%<br>Score 70-79 = 13.33%  | Score 90-99 = 6.67%<br>Score 80-89 = 20.00%<br>Score 70-79 = 73.33%    |  |  |  |  |  |  |  |                                                                                                                                                                                                                          |
|                       |                                                                                                                                                  |                                                                                                                                                                                                                                                                        | No statistical significance test performed                            |                                                                        |  |  |  |  |  |  |  |                                                                                                                                                                                                                          |
| S. Singh et al., 2023 | Superficial infection; Deep infection                                                                                                            | Both recorded cumulatively until final FUP at 24-weeks                                                                                                                                                                                                                 |                                                                       |                                                                        |  |  |  |  |  |  |  | Varus/valgus angulation, knee stiffness, ankle stiffness, nonunion, delayed union, and malunion all had insignificant differences. Deep infection and anterior knee pain the only significantly different complications. |

SI2.2.3 – Patient-assessed data from the non-randomised studies (continued)

|                    |                                                                         |                                                                                                                                                                          |                                    |                         |                         |                                      |                                   |                                   |  |  |  |                                                                                                                                                              |
|--------------------|-------------------------------------------------------------------------|--------------------------------------------------------------------------------------------------------------------------------------------------------------------------|------------------------------------|-------------------------|-------------------------|--------------------------------------|-----------------------------------|-----------------------------------|--|--|--|--------------------------------------------------------------------------------------------------------------------------------------------------------------|
| Taori et al., 2023 | Time to Union; AOFAS; Overall complications                             | Time to Union = not reported; AOFAS = final FUP 12 months; Overall complications = cumulative FUPs (minimum 12 months)                                                   | 77.5 ± 8.9 at 12 months            | 88.3 ± 9.1 at 12 months | 70.2 ± 6.4 at 12 months |                                      |                                   |                                   |  |  |  | Ankle stiffness, nonunion, varus deformity, and valgus deformity were compared. There was no significant difference in overall complications of deformities. |
|                    |                                                                         |                                                                                                                                                                          | P = < 0 .001* (one-way ANOVA test) |                         |                         |                                      |                                   |                                   |  |  |  |                                                                                                                                                              |
| Tukade, 2023       | Time to union; Time to weight bearing; OMAS; Deep/superficial infection | Time to union = mean weeks; Time to weight bearing = mean weeks; OMAS = measured at final FUP (1-year); Deep/superficial infection = cumulative until final FUP (1-year) |                                    |                         |                         | 87.27±5.17 (timeframe not specified) | 85±5.97 (timeframe not specified) | 85±7.07 (timeframe not specified) |  |  |  | No cases of nonunion. No cases of delayed union. No cases of malunion. Ankle stiffness was IMN<CF<Plate                                                      |
|                    |                                                                         |                                                                                                                                                                          | P = 0.59 (ANOVA test)              |                         |                         |                                      |                                   |                                   |  |  |  |                                                                                                                                                              |
| Wang et al., 2023  | AOFAS; Time to union; Superficial and deep infection                    | AOFAS = 12 months; Time to union = days; Superficial and deep infection = not specified (likely reviewed cumulatively at routine follow up appointments - see "POI")     | 87.3±7.7 at 12 months              | 86.3±6.9 at 12 months   |                         |                                      |                                   |                                   |  |  |  | Insignificant differences in malalignment (rotational + angular)                                                                                             |
|                    |                                                                         |                                                                                                                                                                          | P = 0.057 (independent t-test)     |                         |                         |                                      |                                   |                                   |  |  |  |                                                                                                                                                              |
| Jang et al., 2024  | Infection; PROs (PROMIS)                                                | Reduction loss = 6 weeks; Nonunion = 6 months; PROs (PROMIS) = 2 weeks, 6 weeks, 12 weeks, 6 months, and 12 months; Infection = not specified                            |                                    |                         |                         |                                      |                                   |                                   |  |  |  | No significant difference in Patient Reported Outcomes (PROMIS).                                                                                             |

SI2.2.3 – Patient-assessed data from the non-randomised studies (continued)

|                     |                                                                                                                                                                                                          |                                                                                                                                                                                                                  |                                                                                                                                     |                                                                                                     |                                         |  |  |  |                                                                                                                                                     |                                                                                                             |  |                                                                                                                                          |
|---------------------|----------------------------------------------------------------------------------------------------------------------------------------------------------------------------------------------------------|------------------------------------------------------------------------------------------------------------------------------------------------------------------------------------------------------------------|-------------------------------------------------------------------------------------------------------------------------------------|-----------------------------------------------------------------------------------------------------|-----------------------------------------|--|--|--|-----------------------------------------------------------------------------------------------------------------------------------------------------|-------------------------------------------------------------------------------------------------------------|--|------------------------------------------------------------------------------------------------------------------------------------------|
| Liu et al., 2024    | Time to union;<br>Time to full weight-bearing;<br>AOFAS;<br>Complications (inc. infection, delayed union, nonunion, implant failure)                                                                     | Time to union, time to full weight-bearing = weeks;<br>AOFAS = not specified (at final follow up);<br>Complications = not specified (likely reviewed cumulatively at routine follow up appointments - see notes) | 84.5±4.7 at final follow up (mean follow up period 15.7 months):                                                                    | 82.6±5.8 at final follow up (mean follow up period 15.6 months)                                     |                                         |  |  |  |                                                                                                                                                     |                                                                                                             |  | Significantly more people with fair and poor AOFAS scores in MIPO group.                                                                 |
|                     |                                                                                                                                                                                                          |                                                                                                                                                                                                                  | P = 0.24 (independent t-test)                                                                                                       |                                                                                                     |                                         |  |  |  |                                                                                                                                                     |                                                                                                             |  |                                                                                                                                          |
| Rafiq et al., 2024  | Time to Union;<br>AOFAS;<br>Deep/superficial infection;<br>Overall complications                                                                                                                         | Time to Union = mean weeks;<br>AOFAS = final FUP minimum 12 months; Deep infection = cumulative FUPs (minimum 12 months)                                                                                         | 84.7 ± 7.5 at 12 months                                                                                                             | 87.3 ± 6.8 at 12 months                                                                             |                                         |  |  |  |                                                                                                                                                     |                                                                                                             |  | Malalignment: Plate<IMN. Delayed union: Plate<IMN. Nonunion: Plate<IMN. Alignment control was significantly better in the plating group. |
|                     |                                                                                                                                                                                                          |                                                                                                                                                                                                                  | P = 0.21 (independent t-test)                                                                                                       |                                                                                                     |                                         |  |  |  |                                                                                                                                                     |                                                                                                             |  |                                                                                                                                          |
| Shaikh et al., 2024 | DRI; Patient satisfaction (SF-12);<br>AOFAS;<br>Malalignment;<br>Time to union;<br>Complications (inc. infection, secondary operations, malunion, nonunion, secondary arthritis, amputations, DVT, CRPS) | DRI, SF12, AOFAS = 3, 6, 12 months;<br>Complications = not specified (likely reviewed cumulatively at routine follow up appointments - see "POI")                                                                | 3 months = 41.70±7.97<br>6 months = 45.97±10.33<br>9 months = 57.14±4.66<br>12 months = 60.98±11.49                                 | 3 months = 44.52±13.52<br>6 months = 48.26±7.28<br>9 months = 53.62±7.61<br>12 months = 63.93±10.58 |                                         |  |  |  | DRI:<br>3 months = 44.52±13.52<br>6 months = 48.26±7.28<br>9 months = 53.62±7.61<br>12 months = 63.93±10.58                                         | DRI:<br>3 months = 44.52±13.52<br>6 months = 48.26±7.28<br>9 months = 53.62±7.61<br>12 months = 63.93±10.58 |  | Greater proportion of malunion and secondary operations in the Ilizarov group.                                                           |
|                     |                                                                                                                                                                                                          |                                                                                                                                                                                                                  | 3 months: p = 0.46<br>6 months: p = 0.41<br>9 months: p = 0.11<br>12 months: p = 0.41<br>(statistical significance test not stated) |                                                                                                     |                                         |  |  |  | DRI 3 months: p = 0.24<br>DRI 6 months: p = 0.45<br>DRI 9 months: p = 0.58<br>DRI 12 months: p = 0.14<br>(statistical significance test not stated) |                                                                                                             |  |                                                                                                                                          |
| Singh et al., 2025  | AOFAS                                                                                                                                                                                                    | AOFAS = minimum of 6-month follow-up                                                                                                                                                                             | 74.2 at final follow up (min. 6 months)                                                                                             | 89.2 at final follow up (min. 6 months)                                                             | 70.5 at final follow up (min. 6 months) |  |  |  |                                                                                                                                                     |                                                                                                             |  | Nonunion: IMN<CF=Plate. Ankle stiffness: Plate<CF=IMN. Varus deformity: Plate<CF<IMN. Valgus deformity: IMN<Plate<CF.                    |
|                     |                                                                                                                                                                                                          |                                                                                                                                                                                                                  | P = 0.05* (independent t-test)                                                                                                      |                                                                                                     |                                         |  |  |  |                                                                                                                                                     |                                                                                                             |  |                                                                                                                                          |

# SI2.2.4 – Clinician-assessed data from the non-randomised studies

| Study                    | Main relevant Outcomes                                                                  | Outcome Timepoints                                                                                                                                                                                 | Superficial Infections (%)                 |        |                | Deep infections (%)                        |       |                | Infections (%)                                                                       |       |                | Overall complication rate (%)    |       |                | Points of interest                                                                                                                                                                                                              |
|--------------------------|-----------------------------------------------------------------------------------------|----------------------------------------------------------------------------------------------------------------------------------------------------------------------------------------------------|--------------------------------------------|--------|----------------|--------------------------------------------|-------|----------------|--------------------------------------------------------------------------------------|-------|----------------|----------------------------------|-------|----------------|---------------------------------------------------------------------------------------------------------------------------------------------------------------------------------------------------------------------------------|
|                          |                                                                                         |                                                                                                                                                                                                    | IMN                                        | Plate  | Circular frame | IMN                                        | Plate | Circular frame | IMN                                                                                  | Plate | Circular frame | IMN                              | Plate | Circular frame |                                                                                                                                                                                                                                 |
| Harris et al., 2006      | Complications (inc. wound problems, superficial and deep infection)                     | Complications = cumulative to final FUP                                                                                                                                                            |                                            | 0%     | 12.5%          |                                            | 0%    | 6.25%          |                                                                                      |       |                |                                  | 8.62% | 37.5%          | ORIF associated with fewer complications and less post-traumatic arthritis                                                                                                                                                      |
|                          |                                                                                         |                                                                                                                                                                                                    | No statistical significance test performed |        |                | No statistical significance test performed |       |                |                                                                                      |       |                | P = 0.007* (Fisher's exact test) |       |                |                                                                                                                                                                                                                                 |
| Yang et al., 2006        | OMAS; Time to union                                                                     | Time to union = weeks; OMAS, Malalignment, Malunion, Anterior knee pain = not specified (final FUP ≈ 33months)                                                                                     |                                            |        |                |                                            |       |                |                                                                                      |       |                |                                  |       |                | No significant difference in lowa ankle score nor malunion/misalignment (rotational was not measured). Anterior knee pain reported in some IMN patients compared none in the Plate group.                                       |
| Janssen et al., 2007     | Time to union; Infection; Time to weight-bearing                                        | Time to union, time to weight-bearing = mean weeks; Infection (likely cumulative at final FUP - see points of interest ["POI"])                                                                    | 0%                                         | 8.3%   |                |                                            |       |                |                                                                                      |       |                |                                  |       |                | Main reason for plate removal was because patients "felt it there". Main reason for IMN removal was knee pain. Insignificant differences in malalignment/malunion (including rotational), despite their hypotheses.             |
|                          |                                                                                         |                                                                                                                                                                                                    | No statistical significance test performed |        |                |                                            |       |                |                                                                                      |       |                |                                  |       |                |                                                                                                                                                                                                                                 |
| Koulouvaris et al., 2007 | Time to union; Infection                                                                | Time to union = months; Infection = 1 week, 1 month, monthly for 12 months & annual follow-up (cumulative)                                                                                         |                                            |        |                |                                            | 7.69% | 0%             |                                                                                      | 7.69% | 9.09%          |                                  |       |                | Significant relationship with the type of fracture and infection. No malunions or nonunions.                                                                                                                                    |
|                          |                                                                                         |                                                                                                                                                                                                    |                                            |        |                | No statistical significance test performed |       |                | P = 0.37 – included comparison with monolateral external fixation (Chi-Squared test) |       |                |                                  |       |                |                                                                                                                                                                                                                                 |
| Vallier et al., 2008     | Complications (inc. infection)                                                          | Infection = cumulative at final FUP                                                                                                                                                                |                                            |        |                | 5.26%                                      | 2.70% |                |                                                                                      |       |                |                                  |       |                | Significantly greater malunion following IMN malalignment. IMN also had significantly greater procedures other than hardware removal (reasons including malalignment).                                                          |
|                          |                                                                                         |                                                                                                                                                                                                    |                                            |        |                | P = 0.46 (Fisher's exact test)             |       |                |                                                                                      |       |                |                                  |       |                |                                                                                                                                                                                                                                 |
| Li et al., 2012          | Time to Union; Time to full weight-bearing; OMAS; Deep infection; Superficial infection | Time to union = mean weeks; Time to full weight-bearing = mean weeks; OMAS = measured at final FUP (25.2 weeks); Infection rates measured cumulatively until final FUP (25.2 weeks between groups) | 4.35%                                      | 13.04% |                | 0%                                         | 0%    |                |                                                                                      |       |                |                                  |       |                | No significant differences in anterior knee pain or malalignment. No cases of nonunion, implant failure or delayed union. No significant differences in mean postoperative varus/valgus angulation, ante-/recurvatum alignment. |
|                          |                                                                                         |                                                                                                                                                                                                    | P = 0.608 (Fisher's two-sided exact test)  |        |                | No statistical significance test performed |       |                |                                                                                      |       |                |                                  |       |                |                                                                                                                                                                                                                                 |

*SI2.2.4 – Clinician-assessed data from the non-randomised studies (continued)*

|                     |                                                                                                                                                                          |                                                                                                                                                                                                                             |                                            |        |    |                                             |       |    |                                 |       |  |                                            |        |     |                                                                                                                                                                                 |
|---------------------|--------------------------------------------------------------------------------------------------------------------------------------------------------------------------|-----------------------------------------------------------------------------------------------------------------------------------------------------------------------------------------------------------------------------|--------------------------------------------|--------|----|---------------------------------------------|-------|----|---------------------------------|-------|--|--------------------------------------------|--------|-----|---------------------------------------------------------------------------------------------------------------------------------------------------------------------------------|
| Seyhan et al., 2012 | Time to union; Time to full weight-bearing; Deep infection; Deep and superficial infection                                                                               | Time to union = mean weeks; Time to full weight-bearing = mean weeks; Infections= measured cumulatively until final FUP (mean 21.4 months)                                                                                  | 0.00%                                      | 11.10% |    | 0%                                          | 5.60% |    | 0%                              | 16.7% |  | 20%                                        | 52.80% |     | No statistically significant difference in rates of nonunion, malunion or implant irritation. Rate of secondary procedures significantly higher in plate compared to IMN.       |
|                     |                                                                                                                                                                          |                                                                                                                                                                                                                             | No statistical significance test performed |        |    | P = 0.508 (Fisher's exact chi-squared test) |       |    | P = 0.073 (Fisher's exact test) |       |  | No statistical significance test performed |        |     |                                                                                                                                                                                 |
| Fadel et al., 2014  | Time to union; Time to partial weight-bearing; Time to full weight-bearing; AOFAS                                                                                        | Time to union = mean weeks; Time to partial weight-bearing = mean days; Time to full weight-bearing = mean weeks; AOFAS = measured at final FUP (24 weeks)                                                                  |                                            | 10%    | 0% |                                             | 0%    | 0% |                                 |       |  |                                            |        |     | No cases of delayed union or nonunion in the CF group (significant difference).                                                                                                 |
|                     |                                                                                                                                                                          |                                                                                                                                                                                                                             | No statistical significance test performed |        |    | No statistical significance test performed  |       |    |                                 |       |  |                                            |        |     |                                                                                                                                                                                 |
| Ali et al., 2015    | Time to union; Time to full weight-bearing; AOFAS; Superficial infection; Deep infection                                                                                 | Time to union = mean weeks; Time to full weight-bearing = mean weeks; AOFAS = at final FUP?; Superficial + Deep infection cumulative to final follow-up (mean FUP was 34.2 months between groups)                           | 3.33%                                      | 6.67%  |    | 0%                                          | 0%    |    |                                 |       |  |                                            |        |     | No difference in rotational malalignment and insignificantly greater angular malalignment in the MIPO group vs IMN. None of these malalignments required secondary operation.   |
|                     |                                                                                                                                                                          |                                                                                                                                                                                                                             | No statistical significance test performed |        |    | No statistical significance test performed  |       |    |                                 |       |  |                                            |        |     |                                                                                                                                                                                 |
| Jöstl et al., 2015  | Time to union; Overall complication rate (inc. nonunion, implant irritation, painful scar, post-traumatic arthritis, refracture, compartment syndrome, Sudeck's disease) | Time to union = days; Overall complication rate = cumulative at final FUP                                                                                                                                                   |                                            |        |    |                                             |       |    |                                 |       |  | 12%                                        | 13%    | 25% | No significant differences in malunion, post-traumatic arthritis, refracture, painful/broken interlocking screw, or range of motion in the knee joint between the three groups. |
|                     |                                                                                                                                                                          |                                                                                                                                                                                                                             |                                            |        |    |                                             |       |    |                                 |       |  | No statistical significance test performed |        |     |                                                                                                                                                                                 |
| Ali et al., 2016    | Time to Union; Time to partial weight-bearing; Time to full weight-bearing; Teeny and Wiss; Deep/superficial infection                                                   | Time to Union = mean weeks; Time to partial weight-bearing = mean weeks; Time to full weight-bearing = mean weeks; Teeny and Wiss = final FUP 9 months post-op; Deep/superficial infection = cumulative FUPs until 9 months | 6.67%                                      | 6.67%  |    | 0%                                          | 3.33% |    |                                 |       |  |                                            |        |     | Malunion, Delayed union, Ankle stiffness, Anterior knee pain, and Nonunion were measured. None of these were statistically significant using Fisher's test.                     |
|                     |                                                                                                                                                                          |                                                                                                                                                                                                                             | P = 1.0 (Fisher's exact test)              |        |    | P = 1.0 (Fisher's exact test)               |       |    |                                 |       |  |                                            |        |     |                                                                                                                                                                                 |
| Barcak et al., 2016 | AOFAS; SF-36; Time to union; Superficial infections                                                                                                                      | Time to union = weeks; AOFAS, SF-36 = at minimum of 1 year follow up; Infection = cumulative at final FUP                                                                                                                   | 3.60%                                      | 0.00%  |    |                                             |       |    |                                 |       |  |                                            |        |     | Quantitatively higher scores in Short Form 36 scores in the IMN group but no significant difference. No significant difference in malalignment (rotational not measured).       |
|                     |                                                                                                                                                                          |                                                                                                                                                                                                                             | P = 0.82 (Fisher's exact test)             |        |    |                                             |       |    |                                 |       |  |                                            |        |     |                                                                                                                                                                                 |

*SI2.2.4 – Clinician-assessed data from the non-randomised studies (continued)*

|                       |                                                                                                                    |                                                                                                                                                                                                                    |                                            |        |        |                                            |      |    |                                 |       |  |  |  |  |                                                                                                                                                                                                                 |
|-----------------------|--------------------------------------------------------------------------------------------------------------------|--------------------------------------------------------------------------------------------------------------------------------------------------------------------------------------------------------------------|--------------------------------------------|--------|--------|--------------------------------------------|------|----|---------------------------------|-------|--|--|--|--|-----------------------------------------------------------------------------------------------------------------------------------------------------------------------------------------------------------------|
| Shen et al., 2016     | Wound complications                                                                                                | Cumulative until final FUP at 12 months (FUP 6, 10, 14 weeks, then every 6–8 weeks)                                                                                                                                |                                            |        |        |                                            |      |    |                                 |       |  |  |  |  | Malreduction / deformity (inc. valgus/varus, ante-/recurvation, rotation): significantly higher in IMN. No cases of shortening or nonunion.                                                                     |
| Beytemur et al., 2017 | Time to Union; OMAS; Deep/superficial infection                                                                    | Time to Union = mean weeks; OMAS = final FUP mean 29.4 months; Deep infection = cumulative FUPs until mean 29.4 months                                                                                             | 8.1%                                       | 19.4%  |        | 0%                                         | 2.8% |    |                                 |       |  |  |  |  | Anterior knee pain, Varus malunion, Valgus malunion, and Recurvatum malunion were significantly greater with IMN. Ankle dorsiflexion was significantly decreased with IMN.                                      |
|                       |                                                                                                                    |                                                                                                                                                                                                                    | P = 0.159 (Fisher's exact test)            |        |        | P = 0.493 (Fisher's exact test)            |      |    |                                 |       |  |  |  |  |                                                                                                                                                                                                                 |
| Imren et al., 2017    | Time to union; Complications (inc. infection, hardware removal, delayed union); AOFAS; Time to full weight-bearing | Time to union, time to full weight-bearing = weeks; AOFAS = 1, 2 and 3 years; Delayed union = 6 months; Complications = not specified (likely reviewed cumulatively at routine follow up appointments - see "POI") |                                            | 23.81% | 65.00% |                                            | 0%   | 5% |                                 |       |  |  |  |  |                                                                                                                                                                                                                 |
|                       |                                                                                                                    |                                                                                                                                                                                                                    | No statistical significance test performed |        |        | No statistical significance test performed |      |    |                                 |       |  |  |  |  |                                                                                                                                                                                                                 |
| Kawalkar et al., 2018 | Time to Union; Time to partial weight-bearing; AOFAS; Overall complications                                        | Time to Union = mean weeks; Time to partial weight-bearing = mean weeks; AOFAS = final FUP at a minimum of 12 months; Overall complications = Cumulative over at least 12 months                                   |                                            |        |        |                                            |      |    |                                 |       |  |  |  |  | Greater nonunion with plate but greater malunion with IMN.                                                                                                                                                      |
| Mahendra et al., 2018 | Time to Union; Time to partial weight-bearing (callus formation); OMAS; Deep/superficial infection                 | Time to Union = mean weeks; Time to partial weight-bearing = mean weeks; OMAS = final FUP 2 years post-op; Deep/superficial infection = cumulative FUPs until 2-year mark                                          | 0%                                         | 10%    |        | 0%                                         | 5%   |    |                                 |       |  |  |  |  | No significant difference in mean angulation or shortening between groups. IMN group had mild anterior knee pain & discomfort when kneeling, and mild pain over screw head. Malunion rates higher in IMN group. |
|                       |                                                                                                                    |                                                                                                                                                                                                                    | No statistical significance test performed |        |        | No statistical significance test performed |      |    |                                 |       |  |  |  |  |                                                                                                                                                                                                                 |
| Valenti et al., 2019  | Time to union; Wound problems; Infection; Malunion; Anterior knee pain; Time to full weight-bearing; OMAS; DRI     | Time to union, time to full weight-bearing = weeks; DRI, OMAS = 3, 6, 12 months; Infection, anterior knee pain, wound problems, secondary operations = cumulative at final FUP (see "POI")                         |                                            |        |        |                                            |      |    | 0.00%                           | 3.70% |  |  |  |  | No significant difference in malunion/misalignment (including rotational). Greater proportion of knee pain in IMN group but not statistically significant.                                                      |
|                       |                                                                                                                    |                                                                                                                                                                                                                    |                                            |        |        |                                            |      |    | P = 0.084 (Fisher's exact test) |       |  |  |  |  |                                                                                                                                                                                                                 |



*S12.2.4 – Clinician-assessed data from the non-randomised studies (continued)*

|                         |                                                                                                                         |                                                                                                                                                                                                                                                    |                                            |        |  |                                            |        |  |                                      |       |  |                              |        |  |                                                                                                                                                                                                 |
|-------------------------|-------------------------------------------------------------------------------------------------------------------------|----------------------------------------------------------------------------------------------------------------------------------------------------------------------------------------------------------------------------------------------------|--------------------------------------------|--------|--|--------------------------------------------|--------|--|--------------------------------------|-------|--|------------------------------|--------|--|-------------------------------------------------------------------------------------------------------------------------------------------------------------------------------------------------|
| Say et al., 2020        | Time to union; Median AOFAS; Infection                                                                                  | Time to union = weeks; AOFAS / Infection = likely cumulative at final FUP                                                                                                                                                                          | 11.10%                                     | 23.50% |  | 0%                                         | 0%     |  |                                      |       |  | 50%                          | 52.90% |  | No significant difference in malunion, nonunion, or implant irritation                                                                                                                          |
|                         |                                                                                                                         |                                                                                                                                                                                                                                                    | P = 0.33 (Chi-Squared test)                |        |  | No statistical significance test performed |        |  |                                      |       |  | P = 0.862 (Chi-Squared test) |        |  |                                                                                                                                                                                                 |
| El Zohairy et al., 2021 | OMAS; Time to full weight-bearing; Time to union; Deep infection rate                                                   | OMAS = 6 months; Time to full weight-bearing = Not specified; Deep infection rate = Not specified                                                                                                                                                  |                                            |        |  |                                            |        |  |                                      |       |  |                              |        |  | No significant differences noted in OMAS. Nor in time to union, time to weight bearing or deep infections, despite not reporting any values for these outcomes.                                 |
| Keerio et al., 2021     | Time to Union; Time to full weight-bearing; OMAS; Deep infection                                                        | Time to Union = mean weeks; Time to full weight-bearing = mean weeks; OMAS = final FUP 1 year after fracture; Deep infection = cumulative FUPs after 6,12,18,24 weeks and every 3 months until final FUP (1 year)                                  |                                            |        |  | 0%                                         | 26.70% |  |                                      |       |  |                              |        |  | Significantly greater range of ankle movement in both plantar- and dorsi-flexion for IMN. Some cases of malalignment in IMN, but not plate group. Cases of delayed union higher in plate group. |
|                         |                                                                                                                         |                                                                                                                                                                                                                                                    |                                            |        |  | No statistical significance test performed |        |  |                                      |       |  |                              |        |  |                                                                                                                                                                                                 |
| Kumar et al., 2021      | Time to union; Time to full weight-bearing; Superficial infection; Deep infection                                       | Cumulative follow ups until 1 year post-op                                                                                                                                                                                                         | 0%                                         | 5%     |  | 0%                                         | 15%    |  |                                      |       |  |                              |        |  | More knee stiffness and pain reported in IMN. More ankle stiffness reported in plate.                                                                                                           |
|                         |                                                                                                                         |                                                                                                                                                                                                                                                    | No statistical significance test performed |        |  | No statistical significance test performed |        |  |                                      |       |  |                              |        |  |                                                                                                                                                                                                 |
| Almishri et al., 2022   | Time to Union; Teeny and Wiss functional score; Infection                                                               | Time to Union = mean months; Teeny and Wiss = after 9-month FUP; Infection = measured cumulatively every 4 weeks until final 9-month FUP                                                                                                           |                                            |        |  |                                            |        |  | 33.3%                                | 55.6% |  |                              |        |  | More nonunion in IMN but more deformities and delayed union in plate.                                                                                                                           |
|                         |                                                                                                                         |                                                                                                                                                                                                                                                    |                                            |        |  |                                            |        |  | P = 0.34 (Pearson's Chi-Square test) |       |  |                              |        |  |                                                                                                                                                                                                 |
| Bleeker et al., 2022    | Complications (infection, malalignment, secondary operations); Median time to full weight bearing; Median time to union | Median time to union = months; Median time to full weight bearing = months; Infection (and secondary operations, anterior knee pain, range of motion) = not specified (likely reviewed cumulatively at routine follow up appointments - see "POI") | 4.76%                                      | 4.17%  |  | 1.59%                                      | 8.33%  |  | 6.35%                                | 12.5% |  |                              |        |  | Insignificant differences in malalignment (rotational + angular)                                                                                                                                |
|                         |                                                                                                                         |                                                                                                                                                                                                                                                    | No statistical significance test performed |        |  | No statistical significance test performed |        |  | P = 0.21 (Fisher's exact test)       |       |  |                              |        |  |                                                                                                                                                                                                 |
| Sharma et al., 2022     | Time to Union; Teeny and Wiss functional score; Superficial infection; Deep Infection                                   | Time to Union = mean weeks; Teeny and Wiss functional score; Superficial infection; Deep Infection                                                                                                                                                 | 13.33%                                     | 0%     |  | 6.66%                                      | 13.33% |  |                                      |       |  |                              |        |  | Very minor differences in malunion and delayed union.                                                                                                                                           |
|                         |                                                                                                                         |                                                                                                                                                                                                                                                    | P = > 0.05 (Chi-Squared test)              |        |  | No statistical significance test performed |        |  |                                      |       |  |                              |        |  |                                                                                                                                                                                                 |

*S12.2.4 – Clinician-assessed data from the non-randomised studies (continued)*

|                       |                                                                                                                                                  |                                                                                                                                                                                                                                                                        |                                                       |            |        |                                                        |            |    |                                |     |  |                                       |        |        |                                                                                                                                                                                                                          |
|-----------------------|--------------------------------------------------------------------------------------------------------------------------------------------------|------------------------------------------------------------------------------------------------------------------------------------------------------------------------------------------------------------------------------------------------------------------------|-------------------------------------------------------|------------|--------|--------------------------------------------------------|------------|----|--------------------------------|-----|--|---------------------------------------|--------|--------|--------------------------------------------------------------------------------------------------------------------------------------------------------------------------------------------------------------------------|
| Bastías et al., 2023  | Overall complications (inc. Superficial infection and deep infection); Time to union                                                             | Overall complications = Cumulative over 2 years post-op; Time to union = mean weeks                                                                                                                                                                                    |                                                       | 20%        | 47.80% |                                                        | 20%        | 0% |                                |     |  |                                       | 56.67% | 65.22% | More malunion/misalignment in plate compared to frame.                                                                                                                                                                   |
|                       |                                                                                                                                                  |                                                                                                                                                                                                                                                                        | P = 0.031* (Chi-Squared test)                         |            |        | P = 0.03* (Fisher's exact test)                        |            |    |                                |     |  | P = 0.520 (Chi-Squared test)          |        |        |                                                                                                                                                                                                                          |
| Kaya et al., 2023     | Time to union; Complications (inc. wound problems, infection, Sudeck atrophy); AOFAS; Teeny-Wiss radiological score; Time to full weight bearing | Wound problems = Last-follow up (time not specified); Time to union = weeks; Time to full weight bearing and return to daily life = days; Complications, Teeny-Wiss score = not specified (likely reviewed cumulatively at routine follow up appointments - see "POI") | 2.9%                                                  | 2.9%       |        | 0.00%                                                  | 2.9%       |    |                                |     |  | 22.86%                                | 29.41% |        |                                                                                                                                                                                                                          |
|                       |                                                                                                                                                  |                                                                                                                                                                                                                                                                        | No statistical significance test performed            |            |        | No statistical significance test performed             |            |    |                                |     |  | P = 0.906 (Pearson's Chi-Square test) |        |        |                                                                                                                                                                                                                          |
| Kumar et al., 2023    | Time to weight bearing; Ankle score; Deep/superficial infection                                                                                  | Time to weight bearing = delayed vs immediate; Ankle score = not recorded; Deep infection = cumulative FUPs (mean FUP 10 months)                                                                                                                                       | 10% (1/10)                                            | 20% (2/10) |        | 0%                                                     | 10% (1/10) |    |                                |     |  |                                       |        |        | Entire plating group had delayed union and much less in the IMN group. Malunion rate higher in the nail group. Nonunion was higher in the plating group.                                                                 |
|                       |                                                                                                                                                  |                                                                                                                                                                                                                                                                        | No statistical significance test performed            |            |        | No statistical significance test performed             |            |    |                                |     |  |                                       |        |        |                                                                                                                                                                                                                          |
| Nath et al., 2023     | Time to union; AOFAS; Infection                                                                                                                  | Time to union = weeks; AOFAS, Infection = 1 year (cumulative appointments at 6 weeks, 12 weeks, 6 months and 1 year)                                                                                                                                                   |                                                       |            |        |                                                        |            |    | 0%                             | 15% |  |                                       |        |        | Nonunion had insignificant difference.                                                                                                                                                                                   |
|                       |                                                                                                                                                  |                                                                                                                                                                                                                                                                        |                                                       |            |        |                                                        |            |    | P = < 0.05* (Chi-Squared test) |     |  |                                       |        |        |                                                                                                                                                                                                                          |
| M. Singh et al., 2023 | Time to union; Time to partial weight-bearing; Time to full weight-bearing; AOFAS                                                                | Time to union = mean weeks; Time to partial weight-bearing = mean days; Time to full weight-bearing = mean weeks; AOFAS = measured at final FUP (24 weeks)                                                                                                             |                                                       |            |        |                                                        |            |    |                                |     |  |                                       |        |        |                                                                                                                                                                                                                          |
| S. Singh et al., 2023 | Superficial infection; Deep infection                                                                                                            | Both recorded cumulatively until final FUP at 24-weeks                                                                                                                                                                                                                 | 6.67%                                                 | 20%        |        | 0%                                                     | 33.33%     |    |                                |     |  |                                       |        |        | Varus/valgus angulation, knee stiffness, ankle stiffness, nonunion, delayed union, and malunion all had insignificant differences. Deep infection and anterior knee pain the only significantly different complications. |
|                       |                                                                                                                                                  |                                                                                                                                                                                                                                                                        | P = 0.4262 (statistical significance test not stated) |            |        | P = 0.0421* (statistical significance test not stated) |            |    |                                |     |  |                                       |        |        |                                                                                                                                                                                                                          |

SI2.2.4 – Clinician-assessed data from the non-randomised studies (continued)

|                    |                                                                                                                             |                                                                                                                                                                                                            |                                            |         |    |                                            |              |    |                                                    |       |  |                                            |        |  |                                                                                                                                                              |
|--------------------|-----------------------------------------------------------------------------------------------------------------------------|------------------------------------------------------------------------------------------------------------------------------------------------------------------------------------------------------------|--------------------------------------------|---------|----|--------------------------------------------|--------------|----|----------------------------------------------------|-------|--|--------------------------------------------|--------|--|--------------------------------------------------------------------------------------------------------------------------------------------------------------|
| Taori et al., 2023 | Time to Union; AOFAS; Overall complications                                                                                 | Time to Union = not reported; AOFAS = final FUP 12 months; Overall complications = cumulative FUPs (minimum 12 months)                                                                                     |                                            |         |    |                                            |              |    |                                                    |       |  |                                            |        |  | Ankle stiffness, nonunion, varus deformity, and valgus deformity were compared. There was no significant difference in overall complications of deformities. |
| Tukade, 2023       | Time to union; Time to weight bearing; OMAS; Deep/superficial infection                                                     | Time to union = mean weeks; Time to weight bearing = mean weeks; OMAS = measured at final FUP (1-year); Deep/superficial infection = cumulative until final FUP (1-year)                                   | 9.09%                                      | 0%      | 0% | 0%                                         | 6.67% (1/15) | 0% |                                                    |       |  |                                            |        |  | No cases of nonunion. No cases of delayed union. No cases of malunion. Ankle stiffness was IMN<CF<Plate                                                      |
|                    |                                                                                                                             |                                                                                                                                                                                                            | No statistical significance test performed |         |    | No statistical significance test performed |              |    |                                                    |       |  |                                            |        |  |                                                                                                                                                              |
| Wang et al., 2023  | AOFAS; Time to union; Superficial and deep infection                                                                        | AOFAS = 12 months; Time to union = days; Superficial and deep infection = not specified (likely reviewed cumulatively at routine follow up appointments - see "POI")                                       | 1.92%                                      | 8.18%   |    | 0.64%                                      | 0.90%        |    |                                                    |       |  |                                            |        |  | Insignificant differences in malalignment (rotational + angular)                                                                                             |
|                    |                                                                                                                             |                                                                                                                                                                                                            | P = 0.031* (Pearson's chi-square test)     |         |    | P = 1.000 (Fisher's exact test)            |              |    |                                                    |       |  |                                            |        |  |                                                                                                                                                              |
| Jang et al., 2024  | Infection; PROs (PROMIS)                                                                                                    | Reduction loss = 6 weeks; Nonunion = 6 months; PROs (PROMIS) = 2 weeks, 6 weeks, 12 weeks, 6 months, and 12 months; Infection = not specified                                                              |                                            |         |    |                                            |              |    | 6.06%                                              | 14.3% |  |                                            |        |  | No significant difference in Patient Reported Outcomes (PROMIS).                                                                                             |
|                    |                                                                                                                             |                                                                                                                                                                                                            |                                            |         |    |                                            |              |    | P = 0.17 (propensity-adjusted Fisher's exact test) |       |  |                                            |        |  |                                                                                                                                                              |
| Liu et al., 2024   | Time to union; Time to full weight-bearing; AOFAS; Complications (inc. infection, delayed union, nonunion, implant failure) | Time to union, time to full weight-bearing = weeks; AOFAS = not specified (at final follow up); Complications = not specified (likely reviewed cumulatively at routine follow up appointments - see notes) | 4.76%                                      | 11.11 % |    | 0.00%                                      | 7.41%        |    |                                                    |       |  | 4.8%                                       | 29.6%  |  | Significantly more people with fair and poor AOFAS scores in MIPO group.                                                                                     |
|                    |                                                                                                                             |                                                                                                                                                                                                            | No statistical significance test performed |         |    | No statistical significance test performed |              |    |                                                    |       |  | No statistical significance test performed |        |  |                                                                                                                                                              |
| Rafiq et al., 2024 | Time to Union; AOFAS; Deep/superficial infection; Overall complications                                                     | Time to Union = mean weeks; AOFAS = final FUP minimum 12 months; Deep infection = cumulative FUPs (minimum 12 months)                                                                                      | 0%                                         | 11.10%  |    | 0%                                         | 5.60%        |    |                                                    |       |  | 17.60%                                     | 22.20% |  | Malalignment: Plate<IMN. Delayed union: Plate<IMN. Nonunion: Plate<IMN. Alignment control was significantly better in the plating group.                     |
|                    |                                                                                                                             |                                                                                                                                                                                                            | P = 0.23 (Fisher's exact test)             |         |    | P = 0.33 (Fisher's exact test)             |              |    |                                                    |       |  | P = 0.66 (Fisher's exact test)             |        |  |                                                                                                                                                              |

*S12.2.4 – Clinician-assessed data from the non-randomised studies (continued)*

|                     |                                                                                                                                                                                              |                                                                                                                                                |                                |       |       |                                |       |       |  |  |  |  |  |  |  |                                                                                                                          |
|---------------------|----------------------------------------------------------------------------------------------------------------------------------------------------------------------------------------------|------------------------------------------------------------------------------------------------------------------------------------------------|--------------------------------|-------|-------|--------------------------------|-------|-------|--|--|--|--|--|--|--|--------------------------------------------------------------------------------------------------------------------------|
| Shaikh et al., 2024 | DRI; Patient satisfaction (SF-12); AOFAS; Malalignment; Time to union; Complications (inc. infection, secondary operations, malunion, nonunion, secondary arthritis, amputations, DVT, CRPS) | DRI, SF12, AOFAS = 3, 6, 12 months; Complications = not specified (likely reviewed cumulatively at routine follow up appointments - see "POI") |                                | 0.00% | 7.70% |                                | 0.00% | 7.70% |  |  |  |  |  |  |  | Greater proportion of malunion and secondary operations in the Ilizarov group.                                           |
|                     |                                                                                                                                                                                              |                                                                                                                                                | P = 0.52 (Fisher's exact test) |       |       | P = 0.52 (Fisher's exact test) |       |       |  |  |  |  |  |  |  |                                                                                                                          |
| Singh et al., 2025  | AOFAS                                                                                                                                                                                        | AOFAS = minimum of 6-month follow-up                                                                                                           |                                |       |       |                                |       |       |  |  |  |  |  |  |  | Nonunion: IMN<CF=Plate.<br>Ankle stiffness: Plate<CF=IMN. Varus deformity: Plate<CF<IMN. Valgus deformity: IMN<Plate<CF. |

# **Analyses of bias**

## ***Supplementary Information 3***

### ***(SI3)***

#### Contents:

#### ❖ **SI3.1 – Quality assessment (RoB2 tool)**

- SI3.1.1 – Radiographically-assessed.....(55)
  - SI3.1.1.1 – Traffic light plot
  - SI3.1.1.2 – Summary plot
  - SI3.1.1.3 – RoB2 decision process and notes
- SI3.1.2 – Patient-assessed.....(60)
  - SI3.1.2.1 – Traffic light plot
  - SI3.1.2.2 – Summary plot
  - SI3.1.2.3 – RoB2 decision process and notes
- SI3.1.3 – Clinician-assessed.....(64)
  - SI3.1.3.1 – Traffic light plot
  - SI3.1.3.2 – Summary plot
  - SI3.1.3.3 – RoB2 decision process and notes

#### ❖ **SI3.2 – Publication and reporting bias**

- SI3.2.1 – Funnel plot.....(70)
- SI3.2.2 – Egger’s test calculation.....(71)

**Quality assessment**  
**(RoB2)**  
(SI3.1)

SI3.1.1.1 – Traffic light plot for  
radiographically assessed outcomes

| Traffic light plot for<br>visually assessed outcomes |                      | Risk of bias domains |              |              |              |              |              |
|------------------------------------------------------|----------------------|----------------------|--------------|--------------|--------------|--------------|--------------|
|                                                      |                      | D1                   | D2           | D3           | D4           | D5           | Overall      |
| Study                                                | Im et al., 2005      | <div>-</div>         | <div>+</div> | <div>X</div> | <div>+</div> | <div>-</div> | <div>X</div> |
|                                                      | Guo et al., 2010     | <div>-</div>         | <div>+</div> | <div>+</div> | <div>+</div> | <div>-</div> | <div>-</div> |
|                                                      | Vallier et al., 2011 | <div>+</div>         | <div>+</div> | <div>+</div> | <div>+</div> | <div>-</div> | <div>-</div> |
|                                                      | Li et al., 2014      | <div>+</div>         | <div>+</div> | <div>+</div> | <div>+</div> | <div>-</div> | <div>-</div> |
|                                                      | Polat et al., 2015   | <div>X</div>         | <div>+</div> | <div>+</div> | <div>+</div> | <div>-</div> | <div>X</div> |
|                                                      | Imran et al., 2016   | <div>-</div>         | <div>+</div> | <div>+</div> | <div>+</div> | <div>-</div> | <div>-</div> |
|                                                      | Wani et al., 2017    | <div>-</div>         | <div>+</div> | <div>+</div> | <div>+</div> | <div>-</div> | <div>-</div> |
|                                                      | Costa et al., 2018   | <div>+</div>         | <div>+</div> | <div>+</div> | <div>+</div> | <div>+</div> | <div>+</div> |
|                                                      | Rayan et al., 2018   | <div>-</div>         | <div>+</div> | <div>+</div> | <div>+</div> | <div>-</div> | <div>-</div> |
|                                                      | Sharma et al., 2018  | <div>-</div>         | <div>+</div> | <div>+</div> | <div>+</div> | <div>-</div> | <div>-</div> |
|                                                      | KC et al., 2021      | <div>-</div>         | <div>+</div> | <div>+</div> | <div>+</div> | <div>-</div> | <div>-</div> |
|                                                      | Kumar et al., 2022   | <div>-</div>         | <div>+</div> | <div>+</div> | <div>-</div> | <div>-</div> | <div>-</div> |
|                                                      | Ahmed et al., 2023   | <div>X</div>         | <div>+</div> | <div>+</div> | <div>+</div> | <div>-</div> | <div>X</div> |
|                                                      | Hamdy et al., 2024   | <div>-</div>         | <div>+</div> | <div>+</div> | <div>+</div> | <div>-</div> | <div>-</div> |
|                                                      | Prabhat et al., 2025 | <div>-</div>         | <div>+</div> | <div>+</div> | <div>+</div> | <div>-</div> | <div>-</div> |

Domains:

D1: Bias arising from the randomization process.

D2: Bias due to deviations from intended intervention.

D3: Bias due to missing outcome data.

D4: Bias in measurement of the outcome.

D5: Bias in selection of the reported result.

Judgement

X High

- Some concerns

+ Low

SI3.1.1.1 – Summary plot for radiographically assessed outcomes

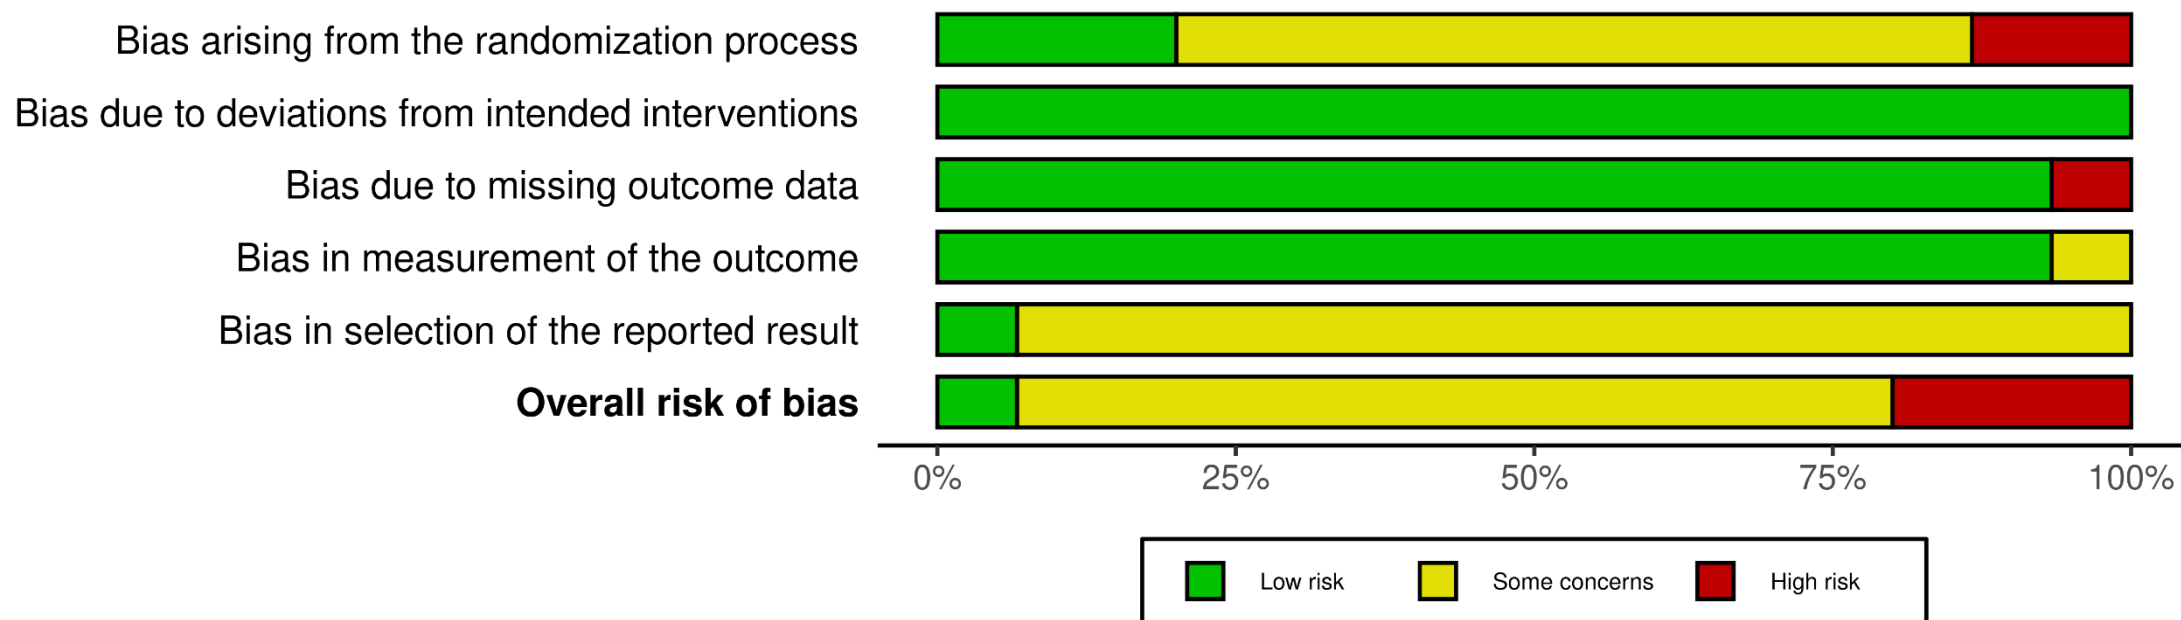



*SI3.1.1.1 – RoB2 decision process and notes*  
*Radiographically assessed outcomes*

| Study                | Overall RoB 2 Judgment | Justification / Notes                                                                                                                                                                                                                                                                                                                                                                                                                                                                                                                                                                                                                  | 1.1 | 1.2 | 1.3 | 2.1 | 2.2 | 2.3 | 2.4 | 2.5 | 2.6 | 2.7 | 3.1 | 3.2 | 3.3 | 3.4 | 4.1 | 4.2 | 4.3 | 4.4 | 4.5 | 5.1 | 5.2 | 5.3 |
|----------------------|------------------------|----------------------------------------------------------------------------------------------------------------------------------------------------------------------------------------------------------------------------------------------------------------------------------------------------------------------------------------------------------------------------------------------------------------------------------------------------------------------------------------------------------------------------------------------------------------------------------------------------------------------------------------|-----|-----|-----|-----|-----|-----|-----|-----|-----|-----|-----|-----|-----|-----|-----|-----|-----|-----|-----|-----|-----|-----|
| Im et al., 2005      | High risk              | No significant differences in baseline characteristics, except there is no statistical test for smoking which does appear to be notably different between both groups (~15%). Does not specify from which intervention groups participants lost to follow up were from, or provide reasoning for why they were lost to follow up. Therefore, we cannot tell differences between interventions in proportions of missing outcome data or whether reasons for missingness differ between interventions. Could not locate pre-analysis plan/trial registration. Likely mITT analysis was completed, although no explicit mention of this. | Y   | Y   | PY  | PY  | Y   | N   |     |     | PY  |     | N   | N   | Y   | NI  | N   | N   | Y   | N   |     | NI  | N   | N   |
| Guo et al., 2010     | Some concerns          | No concealment of allocation process, however baseline characteristics were comparable. Although not explicitly mentioned, mITT can be assumed due to analysis of all participants post-randomisation except for those who had not been followed up at the time of publication. Data is missing (no evidence result is not biased), however missingness is due to the fact that they had not been follow-up at the time of publication.                                                                                                                                                                                                |     | NI  | N   | PY  | Y   | N   |     |     | Y   |     | N   | N   | N   |     | N   | N   | Y   | N   |     | NI  | N   | N   |
| Vallier et al., 2011 | Some concerns          | Whilst assessors would have had knowledge of the procedure, radiographic outcomes in this study are objective making it unlikely that awareness of the intervention would have influenced measurement of the outcome.                                                                                                                                                                                                                                                                                                                                                                                                                  | Y   | Y   | Y   | PY  | Y   | N   |     |     | PY  |     | Y   |     |     |     | N   | N   | Y   | N   |     | NI  | N   | N   |
| Li et al., 2014      | Some concerns          | Although no explicit mention of mITT, all participants were analysed post-randomisation except for 15 lost to follow up. Whilst data missing for around 15 participants, there are documented reasons for this. Could not identify trial registration or pre-analysis plan for this study.                                                                                                                                                                                                                                                                                                                                             | Y   | Y   | N   | PY  | Y   | N   |     |     | PY  |     | N   | N   | PN  |     | N   | N   | Y   | N   |     | NI  | N   | N   |
| Polat et al., 2015   | High risk              | Allocation sequence not concealed as method used was flip of a coin. No specific reference to ITT analysis, however all participants post-randomisation were analysed. Could not access trail registration/pre-analysis plan raising some concerns.                                                                                                                                                                                                                                                                                                                                                                                    |     | NI  | PN  | PY  | Y   | N   |     |     | PY  |     | Y   |     |     |     | N   | N   | Y   | N   |     | NI  | N   | N   |
| Imran et al., 2016   | Some concerns          | No information on concealment of allocation process, and no significance testing between baseline demographic characteristics. However, these characteristics appear to be balanced across both intervention groups. No explicit mention of ITT analysis, but all patients randomised were analysed. No available pre-analysis plan or trial registration could be found for this study raising some concerns.                                                                                                                                                                                                                         |     | NI  | PN  | PY  | Y   | N   |     |     | PY  |     | Y   |     |     |     | N   | N   | Y   | N   |     | NI  | N   | N   |

### SI3.1.1.1 – RoB2 decision process and notes (continued)

#### Radiographically assessed outcomes

|                     |               |                                                                                                                                                                                                                                                                                                                                                                                                                                                                                                                                                                                                                   |   |    |    |    |   |   |  |  |    |  |   |   |    |  |   |   |   |   |    |  |    |   |   |
|---------------------|---------------|-------------------------------------------------------------------------------------------------------------------------------------------------------------------------------------------------------------------------------------------------------------------------------------------------------------------------------------------------------------------------------------------------------------------------------------------------------------------------------------------------------------------------------------------------------------------------------------------------------------------|---|----|----|----|---|---|--|--|----|--|---|---|----|--|---|---|---|---|----|--|----|---|---|
| Wani et al., 2017   | Some concerns | No reference to whether the allocation sequences was concealed, however baseline characteristics were balanced. Whilst no explicit mention of ITT, all participants post-randomisation were analysed. Could not access trail registration/pre-analysis plan raising some concerns.                                                                                                                                                                                                                                                                                                                                |   | NI | N  | PY | Y | N |  |  | PY |  | Y |   |    |  | N | N | Y | N |    |  | NI | N | N |
| Costa et al., 2018  | Low risk      | Sample size was inflated to account for loss of follow up of over 20%, and less than 20% were lost from the primary outcome analysis at every time point, making it unlikely that missing data had an overall impact on measured outcome.                                                                                                                                                                                                                                                                                                                                                                         | Y | Y  | Y  | Y  | Y | N |  |  | Y  |  | N | Y |    |  | N | N | Y | N |    |  | Y  | N | N |
| Rayan et al., 2018  | Some concerns | Allocation sequence random but no information on concealment. However, baseline characteristics appear balanced. Although no reference to mITT, all participants were analysed post-randomisation except for 3 who (refused treatment & lost to follow up) in their original intervention groups. 93.33% (<95%) of original randomised population analysed due to 3 dropouts. However, one from each group dropped out due to insufficient follow up, and another due to treatment refusal. Therefore, unlikely that outcomes were biased as differences were reasonably even across both groups in missing data. |   | NI | PN | PY | Y | N |  |  | PY |  | N | N | PN |  | N | N | Y | N |    |  | NI | N | N |
| Sharma et al., 2018 | Some concerns | No information provided on concealment of allocation process. However, baseline characteristics appeared balanced. No specific reference to ITT analysis, however all participants post-randomisation were analysed.                                                                                                                                                                                                                                                                                                                                                                                              |   | NI | N  | PY | Y | N |  |  | PY |  | Y |   |    |  | N | N | Y | N |    |  | NI | N | N |
| KC et al., 2021     | Some concerns | Allocation was random and concealed. However, there was no significance testing for differences in sex and fracture type between intervention groups, only for age, to assess baseline imbalances. Whilst there was no specific mention of ITT, all participants that were randomised were also analysed. Could not access pre-analysis plan/trail registration.                                                                                                                                                                                                                                                  | Y | Y  | PY | PY | Y | N |  |  | Y  |  | N |   |    |  | N | N | Y | N |    |  | NI | N | N |
| Kumar et al., 2022  | Some concerns | Allocation sequence not concealed. No significance testing on baseline characteristics, however most differences in baseline characteristics are likely due to chance and not the randomisation process. Some concerns in distribution of patients 66-75 years old and types of fracture. No specific reference to ITT, however all participants post-randomisation were analysed. Teeny & Wiss score involves patient reported outcomes (e.g. pain) and therefore knowledge of intervention could influence assessment. However, there is no evidence to suggest this.                                           |   | NI | PN | PY | Y | N |  |  | PY |  | Y |   |    |  | N | N | Y | Y | PN |  | NI | N | N |

### SI3.1.1.1 – RoB2 decision process and notes (continued)

#### Radiographically assessed outcomes

|                      |               |                                                                                                                                                                                                                                                                                                                                                                                                                                                  |  |    |   |    |   |   |  |  |    |  |    |  |  |  |   |   |   |   |  |  |    |   |   |
|----------------------|---------------|--------------------------------------------------------------------------------------------------------------------------------------------------------------------------------------------------------------------------------------------------------------------------------------------------------------------------------------------------------------------------------------------------------------------------------------------------|--|----|---|----|---|---|--|--|----|--|----|--|--|--|---|---|---|---|--|--|----|---|---|
| Ahmed et al., 2023   | High risk     | Patients alternately allocated an intervention ('every other one' basis). Sequence of allocations can be predicted in advance, therefore cannot be considered concealed. Unable to access pre-analysis plan/trial registration.                                                                                                                                                                                                                  |  | N  |   | PY | Y | N |  |  | PY |  | Y  |  |  |  | N | N | Y | N |  |  | NI | N | N |
| Hamdy et al., 2024   | Some concerns | 3 patients lost to follow up in the IMN group. However, >95% of original randomised participants still involved in final analysis. Therefore, nearly all outcome data was available. No mention of time to radiological union as an outcome measure in the pre-analysis plan. No explicit reference to mITT, however all participants were analysed in their original intervention groups apart from the 3 lost to follow up post-randomisation. |  | NI | N | PY | Y | N |  |  | PY |  | PY |  |  |  | N | N | Y | N |  |  | N  | N | N |
| Prabhat et al., 2025 | Some concerns | No information provided on concealment of allocation process. OFAS regarded as clinical measure (but included patient reported elements). Plausible that patient knowledge of intervention could influence certain criteria of the score (e.g. pain), however there is no evidence to suggest this.                                                                                                                                              |  | NI | N | PY | Y | N |  |  | PY |  | Y  |  |  |  | N | N | Y | N |  |  | NI | N | N |

SI3.1.2.1 – Traffic light plot for patient-assessed outcomes

1.2.1 – Traffic light plot for  
assessed outcomes

|       |                     | Risk of bias domains |              |              |              |              |              |
|-------|---------------------|----------------------|--------------|--------------|--------------|--------------|--------------|
|       |                     | D1                   | D2           | D3           | D4           | D5           | Overall      |
| Study | Im et al., 2005     | <div>-</div>         | <div>+</div> | <div>X</div> | <div>-</div> | <div>-</div> | <div>X</div> |
|       | Li et al., 2014     | <div>+</div>         | <div>+</div> | <div>+</div> | <div>-</div> | <div>-</div> | <div>-</div> |
|       | Polat et al., 2015  | <div>X</div>         | <div>+</div> | <div>+</div> | <div>-</div> | <div>-</div> | <div>X</div> |
|       | Wani et al., 2017   | <div>-</div>         | <div>+</div> | <div>+</div> | <div>-</div> | <div>-</div> | <div>-</div> |
|       | Costa et al., 2018  | <div>+</div>         | <div>+</div> | <div>+</div> | <div>-</div> | <div>+</div> | <div>-</div> |
|       | Sharma et al., 2018 | <div>-</div>         | <div>+</div> | <div>+</div> | <div>-</div> | <div>-</div> | <div>-</div> |
|       | Ahmed et al., 2023  | <div>X</div>         | <div>+</div> | <div>+</div> | <div>-</div> | <div>-</div> | <div>X</div> |
|       | Hamdy et al., 2024  | <div>-</div>         | <div>+</div> | <div>+</div> | <div>-</div> | <div>-</div> | <div>-</div> |

Domains:

D1: Bias arising from the randomization process.  
D2: Bias due to deviations from intended intervention.  
D3: Bias due to missing outcome data.  
D4: Bias in measurement of the outcome.  
D5: Bias in selection of the reported result.

Judgement

X High  
- Some concerns  
+ Low

SI3.1.2.2 – Summary plot for patient-assessed outcomes

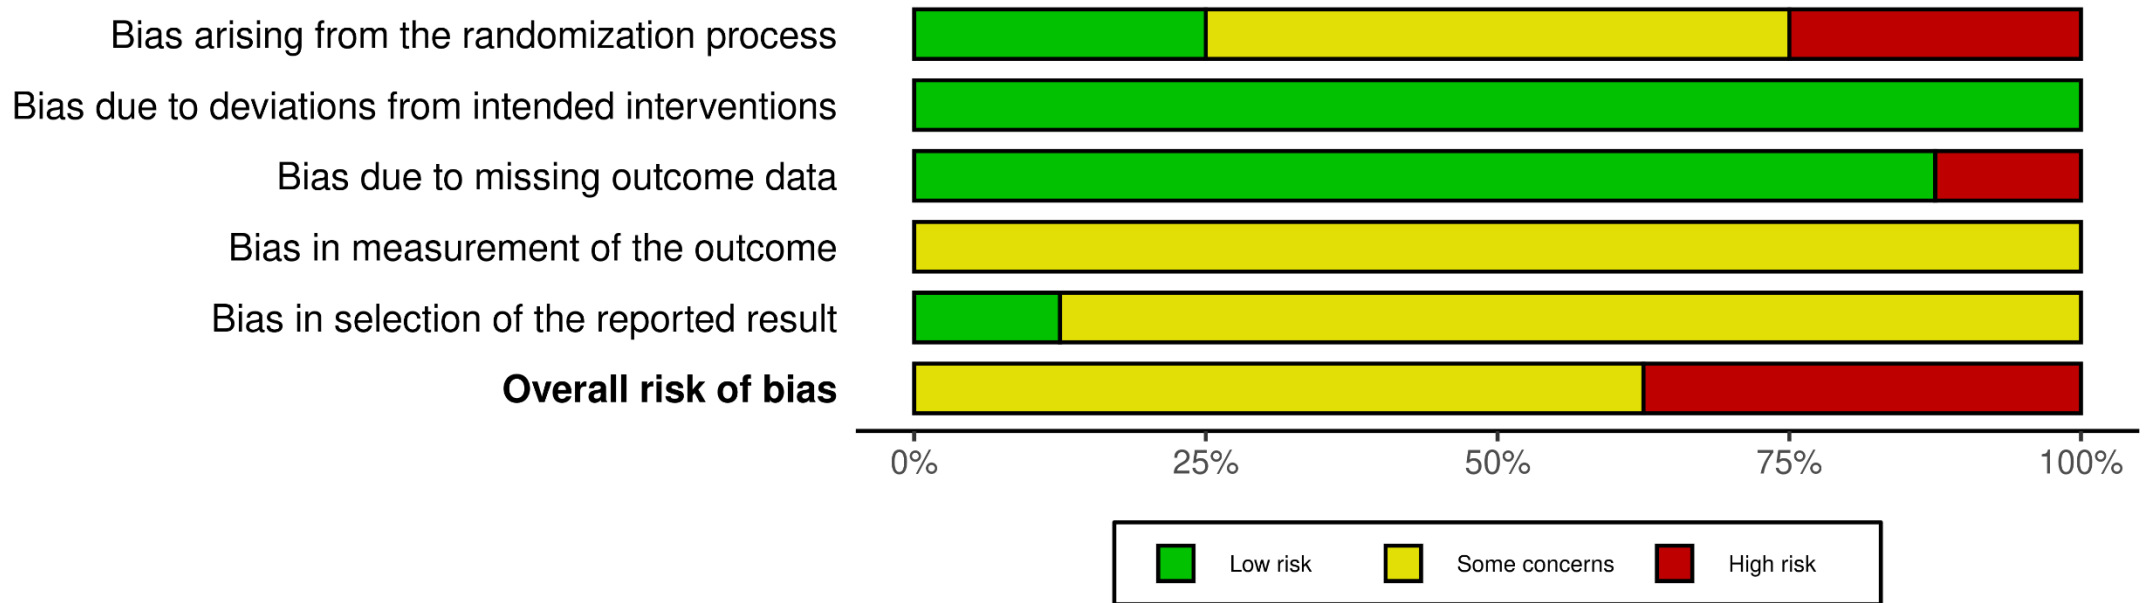

*SI3.1.2.3 – RoB2 decision process and notes*  
*Patient-assessed outcomes*

| Study              | Overall RoB 2 Judgment | Justification / Notes                                                                                                                                                                                                                                                                                                                                                                                                                                                                                                                                                                  | 1.1 | 1.2 | 1.3 | 2.1 | 2.2 | 2.3 | 2.4 | 2.5 | 2.6 | 2.7 | 3.1 | 3.2 | 3.3 | 3.4 | 4.1 | 4.2 | 4.3 | 4.4 | 4.5 | 5.1 | 5.2 | 5.3 |
|--------------------|------------------------|----------------------------------------------------------------------------------------------------------------------------------------------------------------------------------------------------------------------------------------------------------------------------------------------------------------------------------------------------------------------------------------------------------------------------------------------------------------------------------------------------------------------------------------------------------------------------------------|-----|-----|-----|-----|-----|-----|-----|-----|-----|-----|-----|-----|-----|-----|-----|-----|-----|-----|-----|-----|-----|-----|
| Im et al., 2005    | High risk              | Does not specify from which intervention groups participants lost to follow up were from or provide reasoning for why they were lost to follow up. Therefore, we cannot tell differences between interventions in proportions of missing outcome data or whether reasons for missingness differed between interventions. Knowledge of intervention could have influenced self-reported outcomes using OMAS, no evidence to suggest this was the case. Could not locate pre-analysis plan/trial registration. Likely mITT analysis was completed, although no explicit mention of this. | Y   | Y   | PY  | PY  | Y   | N   |     |     | PY  |     | N   | N   | Y   | NI  | N   | N   | Y   | Y   | PN  | NI  | N   | N   |
| Li et al., 2014    | Some concerns          | Although no explicit mention of mITT, all participants were analysed post-randomisation except for 15 lost to follow up. Whilst data missing for around 15 participants, there are documented reasons for this. Soft tissue irritation and anterior knee pain were recorded which could be influenced by knowledge of the intervention. There is no evidence to suggest that this is the case, however. Could not identify trial registration or pre-analysis plan for this study.                                                                                                     | Y   | Y   | N   | PY  | Y   | N   |     |     | PY  |     | N   | N   | PN  |     | N   | N   | Y   | Y   | PN  | NI  | N   | N   |
| Polat et al., 2015 | High risk              | Allocation sequence not concealed as method used was flip of a coin. No specific reference to ITT analysis, however all participants post-randomisation were analysed. FFI, anterior knee pain and prominence of implants are patient reported outcomes. Therefore, knowledge of intervention could influence the assessment of these variables (e.g. pain). However, there is no evidence to suggest that this was the case. Could not access trail registration/pre-analysis plan raising some concerns.                                                                             |     | NI  | PN  | PY  | Y   | N   |     |     | PY  |     | Y   |     |     |     | N   | N   | Y   | Y   | PN  | NI  | N   | N   |
| Wani et al., 2017  | Some concerns          | No reference to whether the allocation sequences was concealed, however baseline characteristics were balanced. Whilst no explicit mention of ITT, all participants post-randomisation were analysed. FFI is a patient reported outcome; therefore knowledge of the intervention could have influenced assessment (e.g. pain). However, there is no evidence to suggest that this was the case. Could not access trail registration/pre-analysis plan raising some concerns.                                                                                                           |     | NI  | N   | PY  | Y   | N   |     |     | PY  |     | Y   |     |     |     | N   | N   | Y   | Y   | PN  | NI  | N   | N   |

### SI3.1.2.3 – RoB2 decision process and notes (continued)

#### Patient-assessed outcomes

|                     |               |                                                                                                                                                                                                                                                                                                                                                                                                                                                                                                                                                  |   |    |   |    |   |   |  |    |  |    |   |  |  |   |   |    |   |    |    |   |   |
|---------------------|---------------|--------------------------------------------------------------------------------------------------------------------------------------------------------------------------------------------------------------------------------------------------------------------------------------------------------------------------------------------------------------------------------------------------------------------------------------------------------------------------------------------------------------------------------------------------|---|----|---|----|---|---|--|----|--|----|---|--|--|---|---|----|---|----|----|---|---|
| Costa et al., 2018  | Some concerns | Sample size was inflated to account for loss of follow up of over 20%, and less than 20% were lost from the primary outcome analysis at every time point, making it unlikely that missing data had an overall impact on measured outcome. Whilst knowledge of the intervention could influence patient assessment of patient reported outcomes, there is no evidence to suggest that this was the case.                                                                                                                                          | Y | Y  | Y | Y  | Y | N |  | Y  |  | N  | Y |  |  | N | N | Y  | Y | PN | Y  | N | N |
| Sharma et al., 2018 | Some concerns | No information provided on concealment of allocation process. However, baseline characteristics appeared balanced. No specific reference to ITT analysis, however all participants post-randomisation were analysed. LEFS (and associated POMF score) and pain score are both patient reported outcomes. Therefore, it is possible that knowledge of the intervention could influenced the assessment of these measures. However, there is no evidence to suggest that this was the case.                                                        |   | NI | N | PY | Y | N |  | PY |  | Y  |   |  |  | N | N | Y  | Y | PN | NI | N | N |
| Ahmed et al., 2023  | High risk     | Patients alternately allocated an intervention ('every other one' basis). Sequence of allocations can be predicted in advance, therefore cannot be considered concealed. This was completed for KSS which is not a PROM that we are analysing in our study. Whilst knowledge of the intervention could have influenced patient reported assessment, there is no evidence to suggest that it did. Unable to access pre-analysis plan/trial registration.                                                                                          |   | N  |   | PY | Y | N |  | PY |  | Y  |   |  |  | N | N | PY | Y | PN | NI | N | N |
| Hamdy et al., 2024  | Some concerns | 3 patients lost to follow up in the IMN group. However, >95% of original randomised participants still involved in final analysis. OMAS assessment could have been influenced by knowledge of intervention, but there is no evidence to suggest that it was. Pre-analysis plan stated a timeframe of 2 weeks for OMAS measurement; however it was measured at 3 and 6 months. No explicit reference to mITT, however all participants were analysed in their original intervention groups apart from the 3 lost to follow up post-randomisation. |   | NI | N | PY | Y | N |  | PY |  | PY |   |  |  | N | N | Y  | Y | PN | N  | N | N |

SI3.1.3.1 – Traffic light plot for  
clinician-assessed outcomes

| Traffic light plot for assessed outcomes               |                      | Risk of bias domains      |             |             |             |             |             |
|--------------------------------------------------------|----------------------|---------------------------|-------------|-------------|-------------|-------------|-------------|
|                                                        |                      | D1                        | D2          | D3          | D4          | D5          | Overall     |
| Study                                                  | Im et al., 2005      | <div></div>               | <div></div> | <div></div> | <div></div> | <div></div> | <div></div> |
|                                                        | Guo et al., 2010     | <div></div>               | <div></div> | <div></div> | <div></div> | <div></div> | <div></div> |
|                                                        | Vallier et al., 2011 | <div></div>               | <div></div> | <div></div> | <div></div> | <div></div> | <div></div> |
|                                                        | Li et al., 2014      | <div></div>               | <div></div> | <div></div> | <div></div> | <div></div> | <div></div> |
|                                                        | Polat et al., 2015   | <div></div>               | <div></div> | <div></div> | <div></div> | <div></div> | <div></div> |
|                                                        | Wani et al., 2017    | <div></div>               | <div></div> | <div></div> | <div></div> | <div></div> | <div></div> |
|                                                        | Costa et al., 2018   | <div></div>               | <div></div> | <div></div> | <div></div> | <div></div> | <div></div> |
|                                                        | Rayan et al., 2018   | <div></div>               | <div></div> | <div></div> | <div></div> | <div></div> | <div></div> |
|                                                        | Sharma et al., 2018  | <div></div>               | <div></div> | <div></div> | <div></div> | <div></div> | <div></div> |
|                                                        | KC et al., 2021      | <div></div>               | <div></div> | <div></div> | <div></div> | <div></div> | <div></div> |
|                                                        | Kumar et al., 2022   | <div></div>               | <div></div> | <div></div> | <div></div> | <div></div> | <div></div> |
|                                                        | Ahmed et al., 2023   | <div></div>               | <div></div> | <div></div> | <div></div> | <div></div> | <div></div> |
|                                                        | Hamdy et al., 2024   | <div></div>               | <div></div> | <div></div> | <div></div> | <div></div> | <div></div> |
|                                                        | Prabhat et al., 2025 | <div></div>               | <div></div> | <div></div> | <div></div> | <div></div> | <div></div> |
| Domains:                                               |                      | Judgement                 |             |             |             |             |             |
| D1: Bias arising from the randomization process.       |                      | <div></div> High          |             |             |             |             |             |
| D2: Bias due to deviations from intended intervention. |                      | <div></div> Some concerns |             |             |             |             |             |
| D3: Bias due to missing outcome data.                  |                      | <div></div> Low           |             |             |             |             |             |
| D4: Bias in measurement of the outcome.                |                      |                           |             |             |             |             |             |
| D5: Bias in selection of the reported result.          |                      |                           |             |             |             |             |             |



SI3.1.3.2 – Summary plot for clinician-assessed outcomes

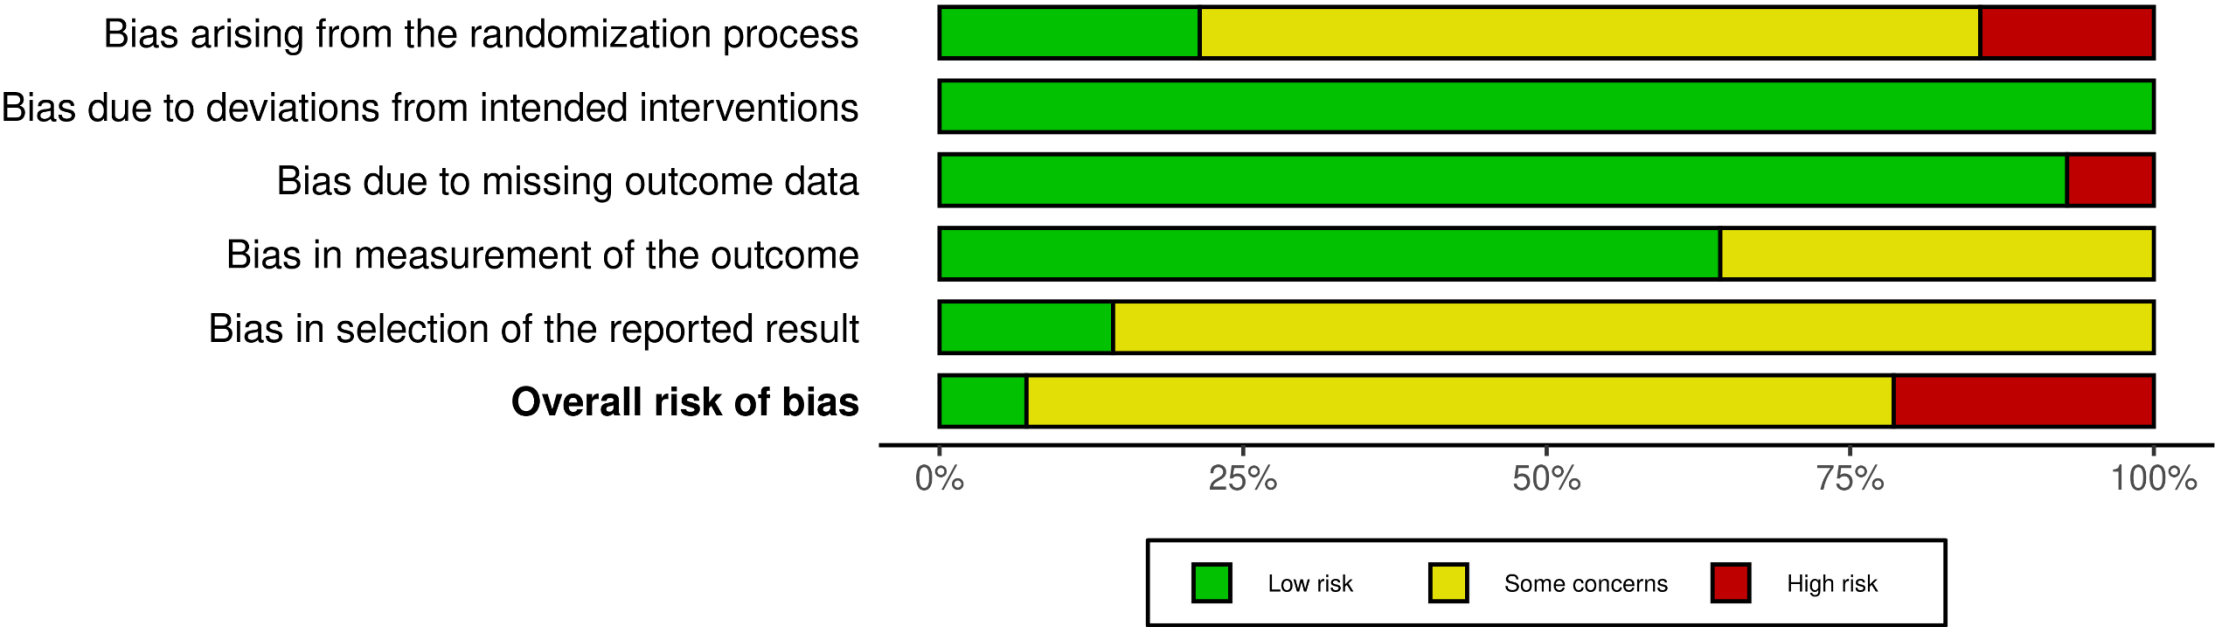

*SI3.1.3.3 – RoB2 decision process and notes*  
*Clinician-assessed outcomes*

| Study                | Overall RoB 2 Judgment | Justification / Notes                                                                                                                                                                                                                                                                                                                                                                                                                                                                                                                                                                                                                                                    | 1.1 | 1.2 | 1.3 | 2.1 | 2.2 | 2.3 | 2.4 | 2.5 | 2.6 | 2.7 | 3.1 | 3.2 | 3.3 | 3.4 | 4.1 | 4.2 | 4.3 | 4.4 | 4.5 | 5.1 | 5.2 | 5.3 |
|----------------------|------------------------|--------------------------------------------------------------------------------------------------------------------------------------------------------------------------------------------------------------------------------------------------------------------------------------------------------------------------------------------------------------------------------------------------------------------------------------------------------------------------------------------------------------------------------------------------------------------------------------------------------------------------------------------------------------------------|-----|-----|-----|-----|-----|-----|-----|-----|-----|-----|-----|-----|-----|-----|-----|-----|-----|-----|-----|-----|-----|-----|
| Im et al., 2005      | High risk              | Does not specify from which intervention groups participants lost to follow up were from, or provide reasoning for why they were lost to follow up. Therefore, we cannot tell differences between interventions in proportions of missing outcome data or whether reasons for missingness differed between interventions. Could not locate pre-analysis plan/trial registration. Likely mITT analysis was completed, although no explicit mention of this.                                                                                                                                                                                                               | Y   | Y   | PY  | PY  | Y   | N   |     |     | PY  |     | N   | N   | Y   | NI  | N   | N   | Y   | N   |     | NI  | N   | N   |
| Guo et al., 2010     | Some concerns          | No concealment of allocation process, however baseline characteristics were comparable. Although not explicitly mentioned, mITT can be assumed due to analysis of all participants post-randomisation except for those who had not been followed up at the time of publication. Data is missing (no evidence result is not biased), however missingness is due to the fact that they had not been follow-up at the time of publication. AOFAS used which included patient reported outcomes (e.g. pain). Therefore, knowledge of the intervention could influence assessment. However, there is no evidence to suggest that this was the case.                           |     | NI  | N   | PY  | Y   | N   |     |     | Y   |     | N   | N   | N   |     | N   | N   | Y   | Y   | PN  | NI  | N   | N   |
| Vallier et al., 2011 | Some concerns          | Missing data from 4 participants in the analysis of those who needed a secondary procedure. This was because they had not reached the 12 month follow up period at the time of the study, meaning their missingness was not dependent on the intervention. Whilst assessors would have had knowledge of the procedure, clinical outcomes in this study (infection and secondary procedures) are objective making it unlikely that awareness of the intervention would have influenced measurement of the outcome.                                                                                                                                                        | Y   | Y   | Y   | PY  | Y   | N   |     |     | PY  |     | N   | N   | N   |     | N   | N   | Y   | N   |     | NI  | N   | N   |
| Li et al., 2014      | Some concerns          | Although no explicit mention of mITT, all participants were analysed post-randomisation except for 15 lost to follow up. Whilst data missing for around 15 participants, there are documented reasons for this. Clinical measures of interest included superficial and deep infection (which are objective and unlikely to be influenced by knowledge of intervention). Mazur ankle score is a clinical measure although includes subjective measures (e.g. pain) which could be influenced by knowledge of the intervention. There is no evidence to suggest that this is the case, however. Could not identify trial registration or pre-analysis plan for this study. | Y   | Y   | N   | PY  | Y   | N   |     |     | PY  |     | N   | N   | PN  |     | N   | N   | Y   | Y   | PN  | NI  | N   | N   |

### SI3.1.3.3 – RoB2 decision process and notes (continued)

#### Clinician-assessed outcomes

|                     |               |                                                                                                                                                                                                                                                                                                                                                                                                                                                                                                                                                                                                                                                                                                                                                                          |   |   |    |    |    |   |   |  |  |  |  |    |  |   |   |    |  |   |   |   |    |    |  |    |   |   |
|---------------------|---------------|--------------------------------------------------------------------------------------------------------------------------------------------------------------------------------------------------------------------------------------------------------------------------------------------------------------------------------------------------------------------------------------------------------------------------------------------------------------------------------------------------------------------------------------------------------------------------------------------------------------------------------------------------------------------------------------------------------------------------------------------------------------------------|---|---|----|----|----|---|---|--|--|--|--|----|--|---|---|----|--|---|---|---|----|----|--|----|---|---|
| Polat et al., 2015  | High risk     | Allocation sequence not concealed as method used was flip of a coin. No specific reference to ITT analysis, however all participants post-randomisation were analysed. Could not access trail registration/pre-analysis plan raising some concerns.                                                                                                                                                                                                                                                                                                                                                                                                                                                                                                                      |   |   | NI | PN | PY | Y | N |  |  |  |  | PY |  | Y |   |    |  | N | N | Y | N  |    |  | NI | N | N |
| Wani et al., 2017   | Some concerns | No reference to whether the allocation sequences was concealed, however baseline characteristics were balanced. Whilst no explicit mention of ITT, all participants post-randomisation were analysed. Could not access trail registration/pre-analysis plan raising some concerns.                                                                                                                                                                                                                                                                                                                                                                                                                                                                                       |   |   | NI | N  | PY | Y | N |  |  |  |  | PY |  | Y |   |    |  | N | N | Y | N  |    |  | NI | N | N |
| Costa et al., 2018  | Low risk      | Sample size was inflated to account for loss of follow up of over 20%, and less than 20% were lost from the primary outcome analysis at every time point, making it unlikely that missing data had an overall impact on measured outcome.                                                                                                                                                                                                                                                                                                                                                                                                                                                                                                                                | Y | Y | Y  | Y  | Y  | Y | N |  |  |  |  | Y  |  | N | Y |    |  | N | N | Y | N  |    |  | Y  | N | N |
| Rayan et al., 2018  | Some concerns | Allocation sequence random but no information on concealment. However, baseline characteristics appear balanced. Although no reference to mITT, all participants were analysed post-randomisation except for 3 who (refused treatment & lost to follow up) in their original intervention groups. 93.33% (<95%) of original randomised population analysed due to 3 dropouts. However, one from each group dropped out due to insufficient follow up, and another due to treatment refusal. Therefore, unlikely that outcomes were biased as differences were reasonably even across both groups in missing data. AOFAS contains patient reported measures (e.g. pain) which could be influenced by knowledge of intervention, but there is no evidence to suggest this. |   |   | NI | PN | PY | Y | N |  |  |  |  | PY |  | N |   |    |  | N | N | Y | Y  | PN |  | NI | N | N |
| Sharma et al., 2018 | Some concerns | No information provided on concealment of allocation process. However, baseline characteristics appeared balanced. No specific reference to ITT analysis, however all participants post-randomisation were analysed.                                                                                                                                                                                                                                                                                                                                                                                                                                                                                                                                                     |   |   | NI | N  | PY | Y | N |  |  |  |  | PY |  | Y |   |    |  | N | N | Y | N  |    |  | NI | N | N |
| KC et al., 2021     | Some concerns | Allocation was random and concealed. However, there was no significance testing for differences in sex and fracture type between intervention groups, only for age. AOFAS regarded as clinical measure (but included patient reported elements). Plausible that patient knowledge of intervention could influence certain criteria of the score (e.g. pain), however there is no evidence to suggest this. Whilst there was no specific mention of ITT, all participants that were randomised were also analysed. Could not access pre-analysis plan/trail registration.                                                                                                                                                                                                 | Y | Y |    | PY | PY | Y | N |  |  |  |  | Y  |  | N | N | PN |  | N | N | Y | PY | PN |  | NI | N | N |

### SI3.1.3.3 – RoB2 decision process and notes (continued)

#### Clinician-assessed outcomes

|                      |               |                                                                                                                                                                                                                                                                                                                                                                                    |  |    |    |    |   |   |  |  |    |  |    |  |  |  |   |   |   |    |    |    |   |   |
|----------------------|---------------|------------------------------------------------------------------------------------------------------------------------------------------------------------------------------------------------------------------------------------------------------------------------------------------------------------------------------------------------------------------------------------|--|----|----|----|---|---|--|--|----|--|----|--|--|--|---|---|---|----|----|----|---|---|
| Kumar et al., 2022   | Some concerns | Allocation sequence not concealed. No significance testing on baseline characteristics, however most differences in baseline characteristics are likely due to chance and not the randomisation process. Some concerns in distribution of patients 66-75 years old and types of fracture. No specific reference to ITT, however all participants post-randomisation were analysed. |  | NI | PN | PY | Y | N |  |  | PY |  | Y  |  |  |  | N | N | Y | N  |    | NI | N | N |
| Ahmed et al., 2023   | High risk     | Patients alternately allocated an intervention ('every other one' basis). Sequence of allocations can be predicted in advance, therefore cannot be considered concealed. Unable to access pre-analysis plan/trial registration.                                                                                                                                                    |  | N  |    | PY | Y | N |  |  | PY |  | Y  |  |  |  | N | N | Y | N  |    | NI | N | N |
| Hamdy et al., 2024   | Some concerns | 3 patients lost to follow up in the IMN group. However, >95% of original randomised participants still involved in final analysis. Clinical outcome measures of complications outlined in pre-analysis plan. No explicit reference to mITT, however all participants were analysed in their original intervention groups apart from the 3 lost to follow up post-randomisation.    |  | NI | N  | PY | Y | N |  |  | PY |  | PY |  |  |  | N | N | Y | N  |    | PY | N | N |
| Prabhat et al., 2025 | Some concerns | No information provided on concealment of allocation process. OFAS regarded as clinical measure (but included patient reported elements). Plausible that patient knowledge of intervention could influence certain criteria of the score (e.g. pain), however there is no evidence to suggest this.                                                                                |  | NI | N  | PY | Y | N |  |  | PY |  | Y  |  |  |  | N | N | Y | PY | PN | NI | N | N |

# **Publication and reporting bias**

(SI3.2)

*Only available for “**time to union**” as it was the only outcome with  $\geq 10$  studies reporting on it for **primary meta-analysis**.*

SI3.2.1 – Funnel plot  
Time to union

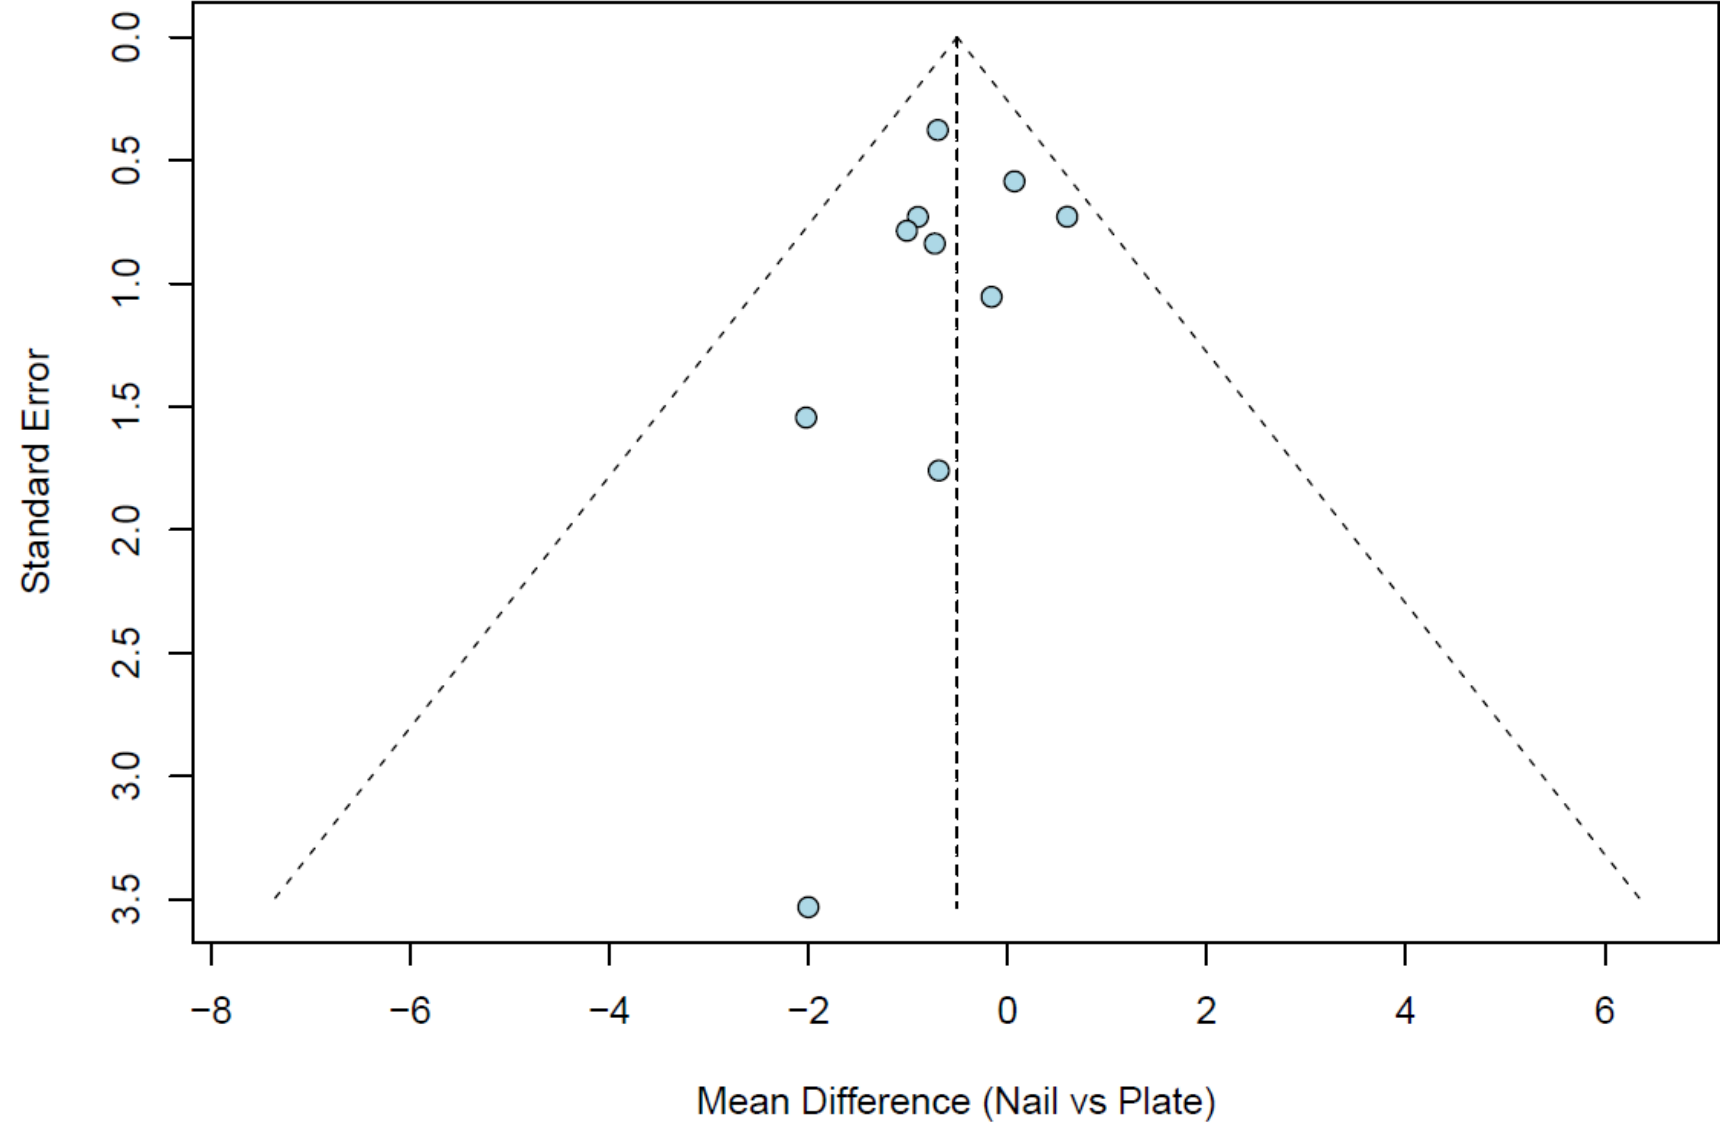

### **Linear regression test of funnel plot asymmetry**

Test result:  $t = -0.54$ ,  $df = 8$ ,  $p\text{-value} = 0.6038$

Bias estimate:  $-0.2994$  ( $SE = 0.5543$ )

Details:

- multiplicative residual heterogeneity variance ( $\tau^2 = 0.6721$ )
- predictor: standard error
- weight: inverse variance
- reference: Egger et al. (1997), BMJ

- *Insignificant publication bias ( $p=0.6038$ )*
- *Moderate heterogeneity was found ( $\tau^2 = 0.67$ ), so there was some variability among studies. However, it did not appear to be related to small-study effects and was probably due to large sample variances - not a true heterogeneity ( $I^2 = 0.00\%$ ).*

# **Primary meta-analyses & Sensitivity analyses**

## ***Supplementary Information 4 (SI4)***

### Contents:

#### ***Primary meta-analyses***

- ❖ SI4.1 – Continuous outcomes.....(73)
  - SI4.1.1 – Time to union
  - SI4.1.2 – Time to full weightbearing
  - SI4.1.3 – OMAS at 3 months
  - SI4.1.4 – OMAS at 6 months
  - SI4.1.5 – FFI at 12 months
  - SI4.1.6 – AOFAS at 12 months
  
- ❖ SI4.2 – Dichotomous outcomes.....(76)
  - SI4.2.1 Overall complications
  - SI4.2.2 Superficial infections
  - SI4.2.3 Deep infections

#### ***Sensitivity analyses***

- ❖ SI4.3 – Continuous outcomes.....(78)
  - SI4.3.1 – Time to union
  
- ❖ SI4.4 – Dichotomous outcomes.....(80)
  - SI4.4.1 Overall complications
  - SI4.4.2 Superficial infections
  - SI4.4.3 Deep infections



**Primary meta-analyses**

**Continuous outcomes**

**(SI4.1)**

### SI4.1.1 – Time to union

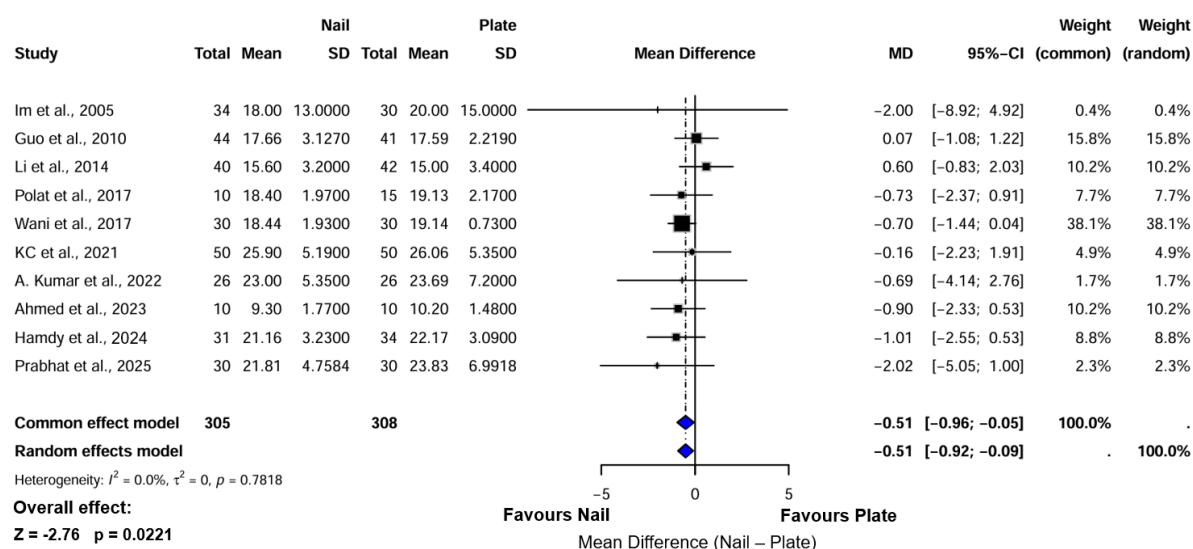

### SI4.1.2 – Time to full weightbearing

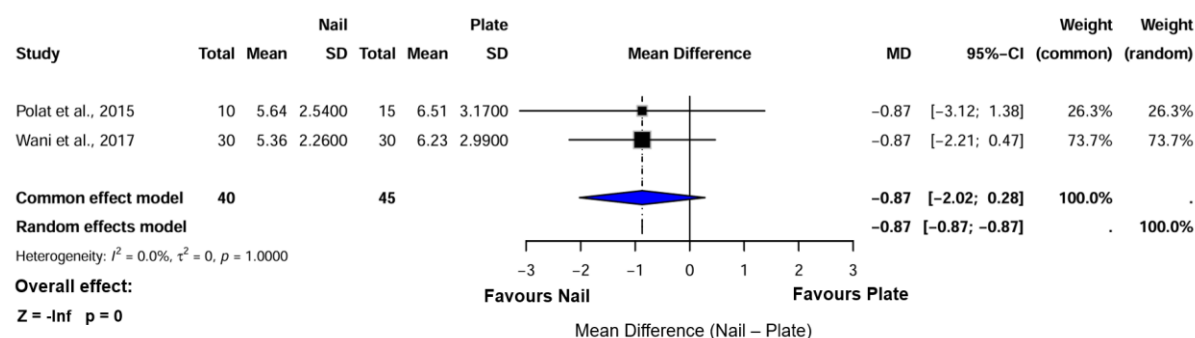

### SI4.1.3 – OMAS at 3 months

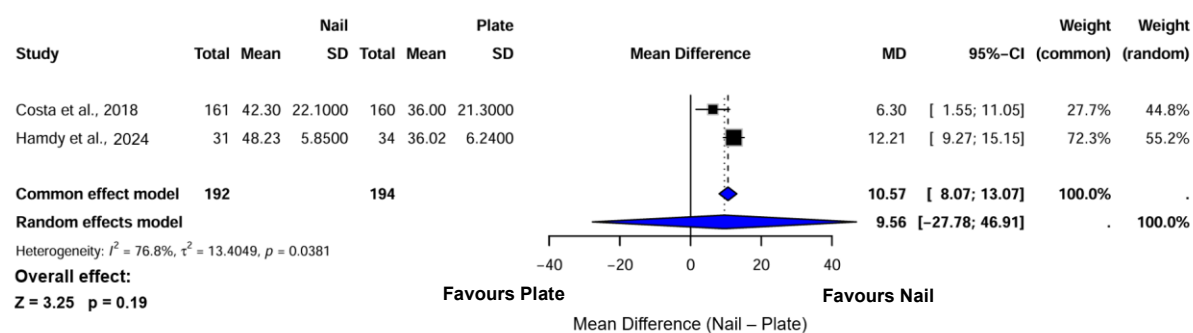

### SI4.1.4 – OMAS at 6 months

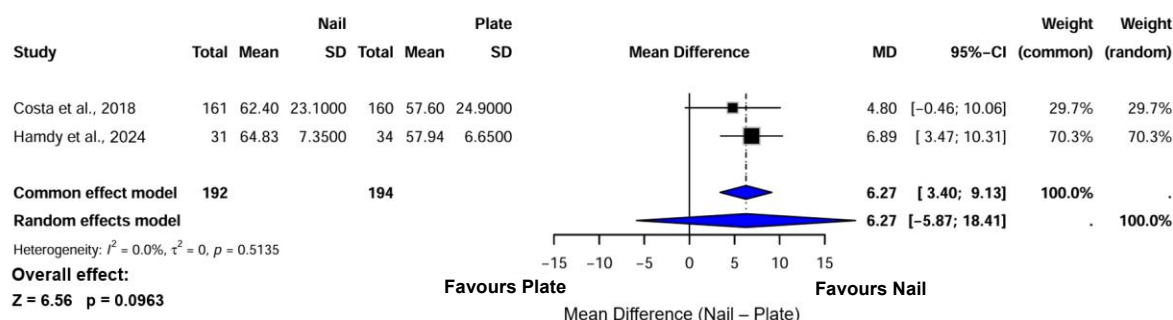

### SI4.1.5 – FFI at 12 months

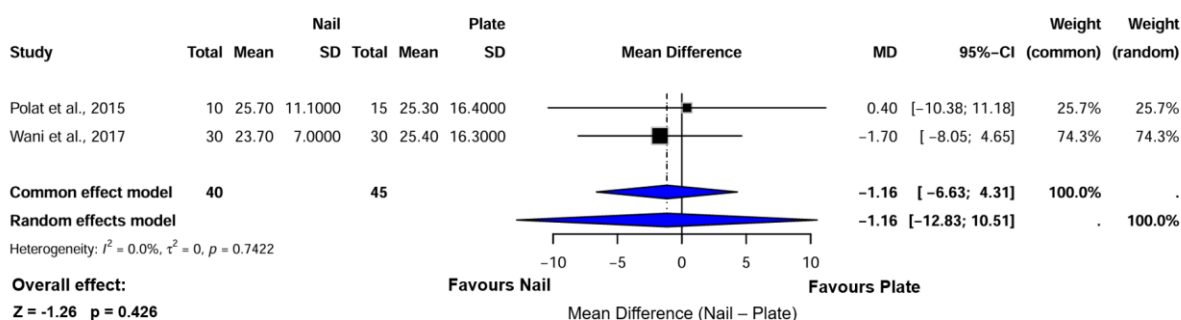

### SI4.1.6 – AOFAS at 12 months

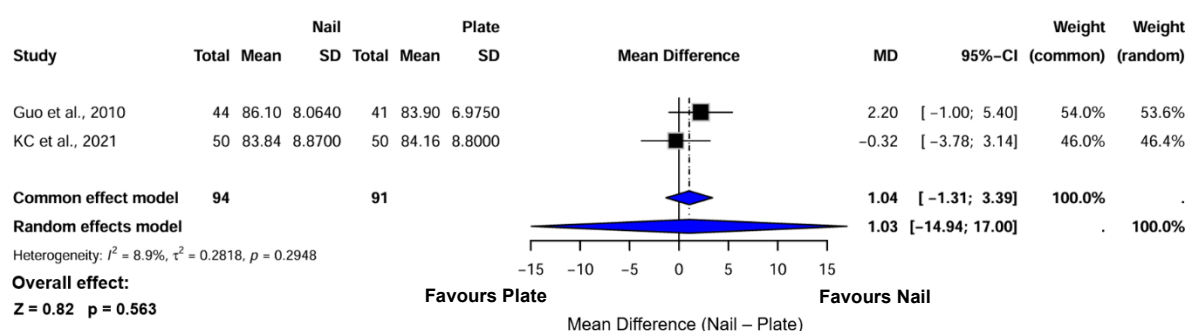

**Primary meta-analyses**  
**Dichotomous outcomes**  
**(SI4.2)**

### SI4.2.1 – Overall complications

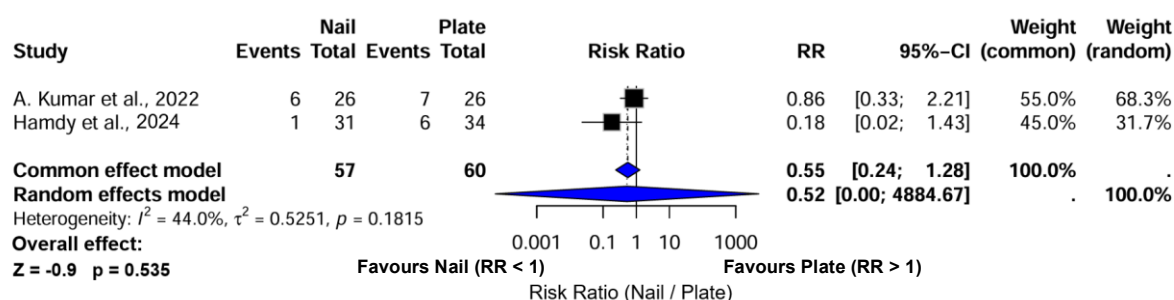

### SI4.2.2 – Superficial infections

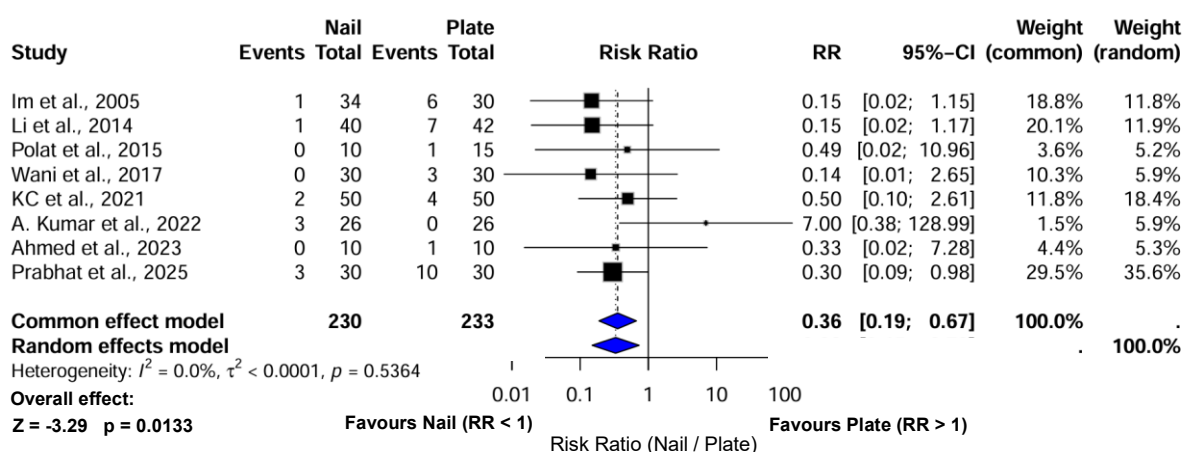

### SI4.2.3 – Deep infections

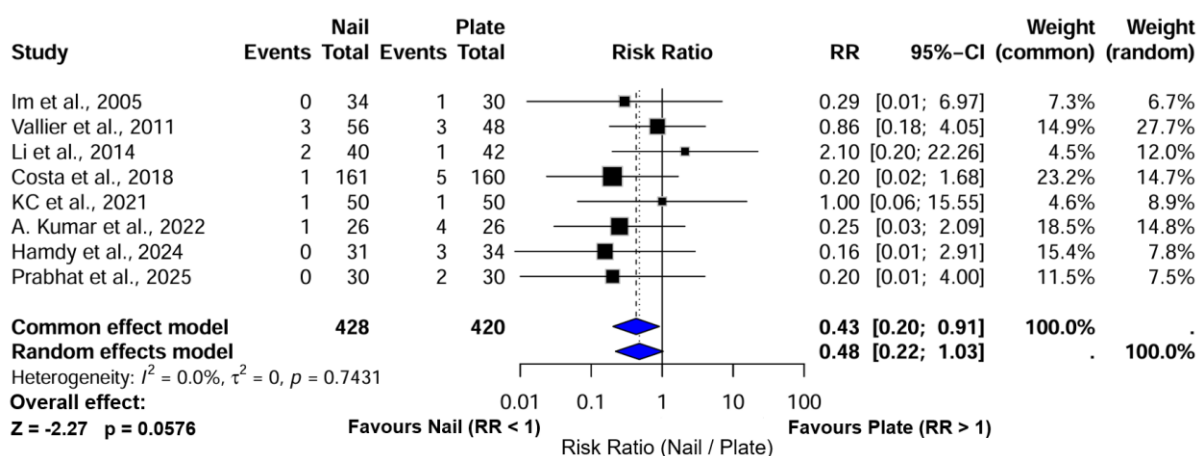

**Sensitivity analyses**  
**Continuous outcomes**  
**(SI4.3)**

### SI4.3.1 – Time to union

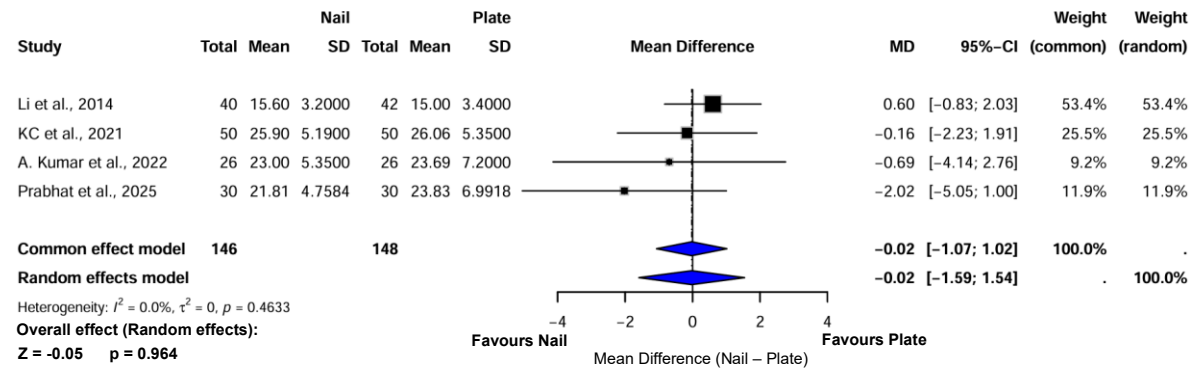

***Sensitivity analyses***

**Dichotomous outcomes**  
**(SI4.4)**



#### SI4.4.1 – Overall complications

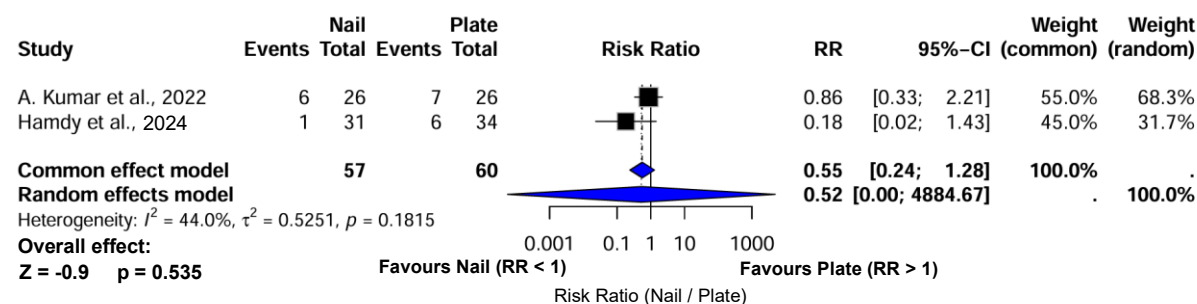

#### SI4.4.2 – Superficial infections

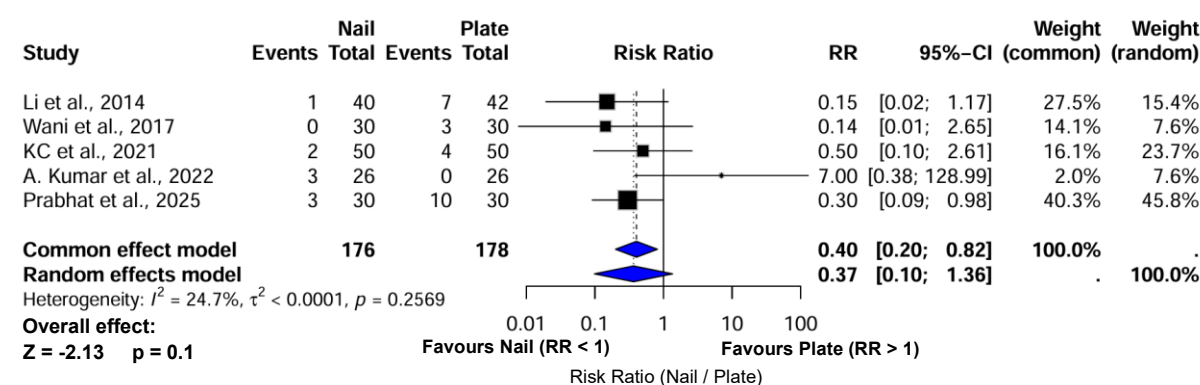

#### SI4.4.3 – Deep infections

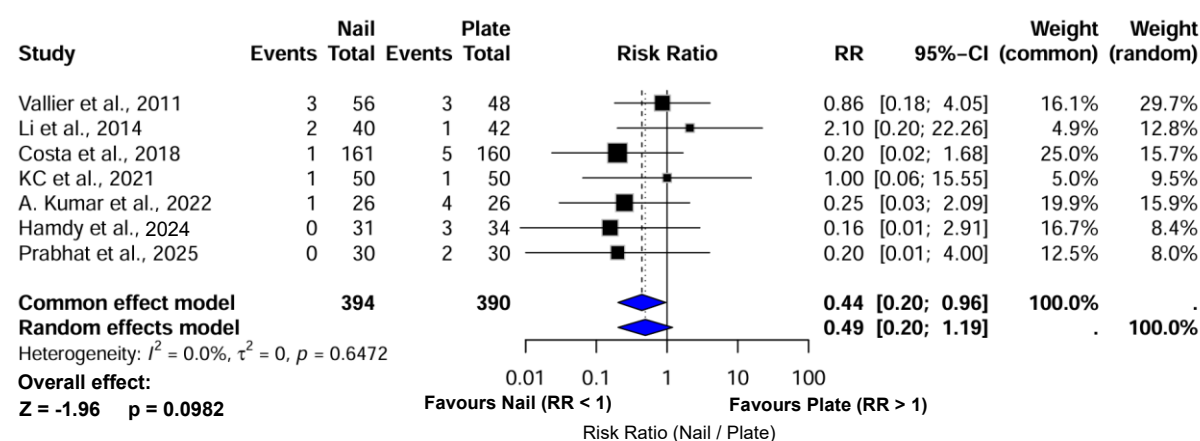

## PRISMA 2020 Checklist

| Section and Topic             | Item # | Checklist item                                                                                                                                                                                                                                                                                       | Location where item is reported |
|-------------------------------|--------|------------------------------------------------------------------------------------------------------------------------------------------------------------------------------------------------------------------------------------------------------------------------------------------------------|---------------------------------|
| <b>TITLE</b>                  |        |                                                                                                                                                                                                                                                                                                      |                                 |
| Title                         | 1      | Identify the report as a systematic review.                                                                                                                                                                                                                                                          | p. 1                            |
| <b>ABSTRACT</b>               |        |                                                                                                                                                                                                                                                                                                      |                                 |
| Abstract                      | 2      | See the PRISMA 2020 for Abstracts checklist.                                                                                                                                                                                                                                                         | p. 2                            |
| <b>INTRODUCTION</b>           |        |                                                                                                                                                                                                                                                                                                      |                                 |
| Rationale                     | 3      | Describe the rationale for the review in the context of existing knowledge.                                                                                                                                                                                                                          | p. 2                            |
| Objectives                    | 4      | Provide an explicit statement of the objective(s) or question(s) the review addresses.                                                                                                                                                                                                               | p. 2                            |
| <b>METHODS</b>                |        |                                                                                                                                                                                                                                                                                                      |                                 |
| Eligibility criteria          | 5      | Specify the inclusion and exclusion criteria for the review and how studies were grouped for the syntheses. <a href="#">p. 10 and SI1.1</a>                                                                                                                                                          |                                 |
| Information sources           | 6      | Specify all databases, registers, websites, organisations, reference lists and other sources searched or consulted to identify studies. Specify the date when each source was last searched or consulted.                                                                                            | p. 9                            |
| Search strategy               | 7      | Present the full search strategies for all databases, registers and websites, including any filters and limits used.                                                                                                                                                                                 | SI1.2                           |
| Selection process             | 8      | Specify the methods used to decide whether a study met the inclusion criteria of the review, including how many reviewers screened each record and each report retrieved, whether they worked independently, and if applicable, details of automation tools used in the process.                     | p. 10                           |
| Data collection process       | 9      | Specify the methods used to collect data from reports, including how many reviewers collected data from each report, whether they worked independently, any processes for obtaining or confirming data from study investigators, and if applicable, details of automation tools used in the process. | p. 10                           |
| Data items                    | 10a    | List and define all outcomes for which data were sought. Specify whether all results that were compatible with each outcome domain in each study were sought (e.g. for all measures, time points, analyses), and if not, the methods used to decide which results to collect.                        | p. 10                           |
|                               | 10b    | List and define all other variables for which data were sought (e.g. participant and intervention characteristics, funding sources). Describe any assumptions made about any missing or unclear information.                                                                                         | pp. 10-11                       |
| Study risk of bias assessment | 11     | Specify the methods used to assess risk of bias in the included studies, including details of the tool(s) used, how many reviewers assessed each study and whether they worked independently, and if applicable, details of automation tools used in the process.                                    | p. 11                           |
| Effect measures               | 12     | Specify for each outcome the effect measure(s) (e.g. risk ratio, mean difference) used in the synthesis or presentation of results.                                                                                                                                                                  | p. 11                           |
| Synthesis methods             | 13a    | Describe the processes used to decide which studies were eligible for each synthesis (e.g. tabulating the study intervention characteristics and comparing against the planned groups for each synthesis (item #5)).                                                                                 | pp. 10-11                       |
|                               | 13b    | Describe any methods required to prepare the data for presentation or synthesis, such as handling of missing summary statistics, or data conversions.                                                                                                                                                | pp. 10-11                       |
|                               | 13c    | Describe any methods used to tabulate or visually display results of individual studies and syntheses.                                                                                                                                                                                               | pp. 11-12                       |
|                               | 13d    | Describe any methods used to synthesize results and provide a rationale for the choice(s). If meta-analysis was performed, describe the model(s), method(s) to identify the presence and extent of statistical heterogeneity, and software package(s) used.                                          | p. 11                           |
|                               | 13e    | Describe any methods used to explore possible causes of heterogeneity among study results (e.g. subgroup analysis, meta-regression).                                                                                                                                                                 | p. 11                           |
|                               | 13f    | Describe any sensitivity analyses conducted to assess robustness of the synthesized results.                                                                                                                                                                                                         | p. 11                           |
| Reporting bias assessment     | 14     | Describe any methods used to assess risk of bias due to missing results in a synthesis (arising from reporting biases).                                                                                                                                                                              | p. 11                           |
| Certainty assessment          | 15     | Describe any methods used to assess certainty (or confidence) in the body of evidence for an outcome.                                                                                                                                                                                                | p. 11                           |

| Section and Topic                              | Item # | Checklist item                                                                                                                                                                                                                                                                       | Location where item is reported |
|------------------------------------------------|--------|--------------------------------------------------------------------------------------------------------------------------------------------------------------------------------------------------------------------------------------------------------------------------------------|---------------------------------|
| <b>RESULTS</b>                                 |        |                                                                                                                                                                                                                                                                                      |                                 |
| Study selection                                | 16a    | Describe the results of the search and selection process, from the number of records identified in the search to the number of studies included in the review, ideally using a flow diagram.                                                                                         | p. 3                            |
|                                                | 16b    | Cite studies that might appear to meet the inclusion criteria, but which were excluded, and explain why they were excluded.                                                                                                                                                          | p. 2                            |
| Study characteristics                          | 17     | Cite each included study and present its characteristics.                                                                                                                                                                                                                            | pp. 2/3, SI2.1.1, and SI2.2.1   |
| Risk of bias in studies                        | 18     | Present assessments of risk of bias for each included study.                                                                                                                                                                                                                         | pp.3/4 and SI3.1                |
| Results of individual studies                  | 19     | For all outcomes, present, for each study: (a) summary statistics for each group (where appropriate) and (b) an effect estimate and its precision (e.g. confidence/credible interval), ideally using structured tables or plots.                                                     | pp. 4-6 and SI2                 |
| Results of syntheses                           | 20a    | For each synthesis, briefly summarise the characteristics and risk of bias among contributing studies. pp. 2/3 and SI3.1                                                                                                                                                             |                                 |
|                                                | 20b    | Present results of all statistical syntheses conducted. If meta-analysis was done, present for each the summary estimate and its precision (e.g. confidence/credible interval) and measures of statistical heterogeneity. If comparing groups, describe the direction of the effect. | p. 6, SI4, and Fig. 2,3,4       |
|                                                | 20c    | Present results of all investigations of possible causes of heterogeneity among study results.                                                                                                                                                                                       | p. 6, SI4 and SI3.1             |
|                                                | 20d    | Present results of all sensitivity analyses conducted to assess the robustness of the synthesized results.                                                                                                                                                                           | p. 6 and SI4                    |
| Reporting biases                               | 21     | Present assessments of risk of bias due to missing results (arising from reporting biases) for each synthesis assessed. pp. 4,6 SI 3.2                                                                                                                                               |                                 |
| Certainty of evidence                          | 22     | Present assessments of certainty (or confidence) in the body of evidence for each outcome assessed.                                                                                                                                                                                  | Figure 5                        |
| <b>DISCUSSION</b>                              |        |                                                                                                                                                                                                                                                                                      |                                 |
| Discussion                                     | 23a    | Provide a general interpretation of the results in the context of other evidence.                                                                                                                                                                                                    | pp. 7-9                         |
|                                                | 23b    | Discuss any limitations of the evidence included in the review.                                                                                                                                                                                                                      | pp. 8-9                         |
|                                                | 23c    | Discuss any limitations of the review processes used.                                                                                                                                                                                                                                | p. 9                            |
|                                                | 23d    | Discuss implications of the results for practice, policy, and future research.                                                                                                                                                                                                       | p. 9                            |
| <b>OTHER INFORMATION</b>                       |        |                                                                                                                                                                                                                                                                                      |                                 |
| Registration and protocol                      | 24a    | Provide registration information for the review, including register name and registration number, or state that the review was not registered.                                                                                                                                       | p. 12                           |
|                                                | 24b    | Indicate where the review protocol can be accessed, or state that a protocol was not prepared.                                                                                                                                                                                       | p. 12                           |
|                                                | 24c    | Describe and explain any amendments to information provided at registration or in the protocol.                                                                                                                                                                                      | p.12                            |
| Support                                        | 25     | Describe sources of financial or non-financial support for the review, and the role of the funders or sponsors in the review.                                                                                                                                                        | p.12                            |
| Competing interests                            | 26     | Declare any competing interests of review authors.                                                                                                                                                                                                                                   | p. 12                           |
| Availability of data, code and other materials | 27     | Report which of the following are publicly available and where they can be found: template data collection forms; data extracted from included studies; data used for all analyses; analytic code; any other materials used in the review.                                           | SI1-4                           |
